# Supplementary material for: Sarcophyolides B–E, New Cembranoids from the Soft Coral Sarcophyton elegans
Source: PubMed Central journal article supplement (PMC3801120; doi:10.3390/md11093186), 2013-08-26
Supplement: marinedrugs-11-03186-s001.pdf [file marinedrugs-11-03186-s001.pdf]

# Supplementary Information

## Table of contents

### The structures and spectroscopic data of known analogues.

**Figure S1.**  $^1\text{H}$  NMR data of sarcophyolide B (1).

**Figure S2.**  $^{13}\text{C}$  NMR data of sarcophyolide B (1).

**Figure S3.** COSY spectrum of sarcophyolide B (1).

**Figure S4.** HMQC spectrum of sarcophyolide B (1).

**Figure S5.** HMBC spectrum of sarcophyolide B (1).

**Figure S6.** NOESY spectrum of sarcophyolide B (1).

**Figure S7.** IR spectrum of sarcophyolide B (1).

**Figure S8.** HRMS spectrum of sarcophyolide B (1).

**Figure S9.**  $^1\text{H}$  NMR data of sarcophyolide C (2).

**Figure S10.**  $^{13}\text{C}$  NMR data of sarcophyolide C (2).

**Figure S11.** COSY spectrum of sarcophyolide C (2).

**Figure S12.** HMQC spectrum of sarcophyolide C (2).

**Figure S13.** HMBC spectrum of sarcophyolide C (2).

**Figure S14.** NOESY spectrum of sarcophyolide C (2).

**Figure S15.** IR spectrum of sarcophyolide C (2).

**Figure S16.** HRMS spectrum of sarcophyolide C (2).

**Figure S17.**  $^1\text{H}$  NMR data of sarcophyolide D (3).

**Figure S18.**  $^{13}\text{C}$  NMR data of sarcophyolide D (3).

**Figure S19.** COSY spectrum of sarcophyolide D (3).

**Figure S20.** HMQC spectrum of sarcophyolide D (3).

**Figure S21.** HMBC spectrum of sarcophyolide D (3).

**Figure S22.** NOESY spectrum of sarcophyolide D (3).

**Figure S23.** IR spectrum of sarcophyolide D (3).

**Figure S24.** HRMS spectrum of sarcophyolide D (3).

**Figure S25.**  $^1\text{H}$  NMR data of sarcophyolide E (4).

**Figure S26.**  $^{13}\text{C}$  NMR data of sarcophyolide E (4).

**Figure S27.** COSY spectrum of sarcophyolide E (4).

**Figure S28.** HMQC spectrum of sarcophyolide E (4).

**Figure S29.** HMBC spectrum of sarcophyolide E (4).

**Figure S30.** NOESY spectrum of sarcophyolide E (4).

**Figure S31.** IR spectrum of sarcophyolide E (4).

**Figure S32.** HRMS spectrum of sarcophyolide E (4).

**Figure S33.** ORTEP depiction for X-ray crystal structure of 1.

**Table 1.** Crystal data and structure refinement for compound 1.

**Table 2.** fractional atomic coordinates and equivalent isotropic displacement parameters for compound 1.

**Table 3.** Anisotropic displacement parameters for compound 1.

**Table 4.** Bond lengths for compound 1.

**Table 5.** Bond angles for compound 1.

**Table 6.** Torsion angles for compound 1.

**Table 7.** Hydrogen atom coordinates and isotropic displacement parameters for compound 1.

**Figure S34.** ORTEP depiction for X-ray crystal structure of 2.

**Table 1.** Crystal data and structure refinement for compound 2.

**Table 2.** fractional atomic coordinates and equivalent isotropic displacement parameters for compound 2.

**Table 3.** Anisotropic displacement parameters for compound 2.

**Table 4.** Bond lengths for compound 2.

**Table 5.** Bond angles for compound 2.

**Table 6.** Torsion angles for compound 2.

**Table 7.** Hydrogen atom coordinates and isotropic displacement parameters for compound 2.

## The structures and spectroscopic data of known analogues

### 1. Sarcophytol L (5):

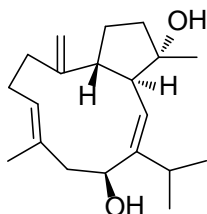

Colorless oil,  $[\alpha]_{\text{D}}^{32.5} -109^\circ$  (*c* 4.6,  $\text{CHCl}_3$ );  $^1\text{H-NMR}$  ( $\text{CDCl}_3$ , 500 MHz),  $\delta$  5.17 (1H, dd), 5.02 (1H, d), 4.87 (1H, brs), 4.86 (1H, brs), 4.54 (1H, dd), 2.54 (1H, d), 2.50 (1H, dd), 2.48 (1H, dd), 2.40 (1H, ddd), 2.38 (1H, dd), 2.27 (1H, ddd), 2.20 (1H, dd), 2.11 (1H, dd), 1.77 (1H, dd), 1.76 (1H, dd), 1.71 (3H, s), 1.65 (1H, ddd), 1.53 (1H, ddd), 1.27 (3H, d), 1.12 (3H, s), 1.09 (3H, d);  $^{13}\text{C-NMR}$  ( $\text{CDCl}_3$ , 125 MHz)  $\delta$  149.2 (s), 148.7 (s), 131.0 (s), 126.5 (d), 125.2 (d), 111.5 (t), 81.3 (s), 71.2 (d), 54.9 (d), 50.1 (d), 44.3 (t), 40.2 (t), 27.9 (t), 27.3 (t), 26.5 (q), 26.0 (d), 25.4 (t), 24.4 (q), 23.4 (q), 14.1 (q); EI-MS  $m/z$  304  $[\text{M}]^+$ .

### 2 13 $\alpha$ -Hydroxysarcophytol L (6)

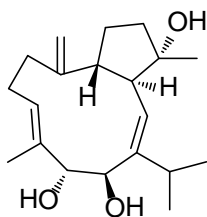

White powder.  $[\alpha]_{\text{D}}^{20} -54^\circ$  (*c* 2.3,  $\text{CHCl}_3$ ); IR(KBr) $\nu_{\text{max}}$  3360, 2961, 2918, 2862, 1650, 1603, 1460, 1398, 1213, 1030  $\text{cm}^{-1}$ ;  $^1\text{H NMR}$  ( $\text{CDCl}_3$ , 500 MHz)  $\delta$ : 5.04 (1H, d,  $J = 10.0$  Hz, H-2), 2.56 (1H, m, H-3), 1.80 (1H, m, H-5a), 1.72 (1H, m, H-5b), 1.88 (1H, m, H-6a), 1.79 (1H, m, H-6b), 2.41 (1H, m, H-7), 2.40 (1H, m, H-9a), 2.33 (1H, m, H-9b), 1.72 (1H, m, H-10a), 1.56 (1H, m, H-10b), 5.49 (1H, brt,  $J = 7.5$  Hz, H-11), 4.53 (1H, d,  $J = 9.5$  Hz, H-13), 3.83 (1H, d,  $J = 9.5$  Hz, H-14), 2.56 (1H, qq,  $J = 6.8$  Hz, H-15), 1.06 (3H, d,  $J = 6.8$  Hz, H-16), 1.16 (3H, d,  $J = 6.8$  Hz, H-17), 1.08 (3H, s, H-18), 4.80 (1H, brs, H-19a), 4.84 (1H, brs, H-19b), 1.68 (1H, s, H-20);  $^{13}\text{C NMR}$  ( $\text{CDCl}_3$ , 125 MHz)  $\delta$ : 146.8 (C-1), 120.7 (C-2), 50.6 (C-3), 81.5 (C-4), 40.5 (C-5), 27.7 (C-6), 54.4 (C-7), 149.5 (C-8), 27.5 (C-9), 25.5 (C-10), 127.3 (C-11), 134.5 (C-12), 71.4 (C-13), 76.7 (C-14), 27.7 (C-15), 24.1 (C-16), 26.5 (C-17), 23.2 (C-18), 111.7 (C-19), 15.0 (C-20); ESI-MS $^-$   $m/z$ : 319  $[\text{M-H}]^+$ .

### 3 Sarcophylide A (7)

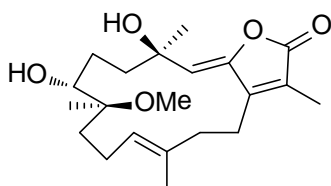

Colorless oil.  $[\alpha]_{\text{D}}^{20} +5^\circ$  (*c* 2.2,  $\text{CHCl}_3$ ); IR(KBr) $\nu_{\text{max}}$  3401, 2932, 2255, 1759, 1634, 1262, 1184, 1083  $\text{cm}^{-1}$ ;  $^1\text{H NMR}$  ( $\text{DMSO-}d_6$ , 500 MHz)  $\delta$ : 5.27 (1H, s, H-3), 1.88 (1H, dt,  $J = 6.8, 14.1$  Hz, H-5a), 1.62 (1H, m, H-5b), 1.27-1.30 (2H, m, H<sub>2</sub>-6), 3.16 (1H, brd,  $J = 7.9$  Hz, H-7), 1.58 (1H, m, H-9a), 1.38 (1H,

m, H-9b), 2.10 (1H, m, H-10a), 1.80 (1H, m, H-10b), 4.97 (1H, dd,  $J = 6.4, 6.5$  Hz, H-11), 2.25 (1H, m, H-13a), 2.12 (1H, m, H-13b), 2.59 (1H, m, H-14a), 2.48 (1H, m, H-14b), 1.84 (3H, s, H-16), 1.36 (3H, s, H-18), 0.94 (3H, s, H-19), 1.56 (3H, s, H-20), 3.04 (3H, s, OMe);  $^{13}\text{C}$  NMR (DMSO- $d_6$ , 125 MHz)  $\delta$ : 153.2 (s, C-1), 147.2 (s, C-2), 119.3 (d, C-3), 72.2 (s, C-4), 40.0 (t, C-5), 25.9 (t, C-6), 74.1 (d, C-7), 79.0 (s, C-8), 33.1 (t, C-9), 21.9 (t, C-10), 129.2 (d, C-11), 130.7 (s, C-12), 38.4 (t, C-13), 21.9 (t, C-14), 122.7 (s, C-15), 170.8 (s, C-17), 8.9 (q, C-16), 31.0 (q, C-18), 19.5 (q, C-19), 16.0 (q, C-20), 49.2 (q, MeO); HR-ESI-MS  $m/z$  387.2140 (calc. for  $\text{C}_{21}\text{H}_{32}\text{O}_5\text{Na}$ , 387.2140).

#### 4 Sarcophine (8)

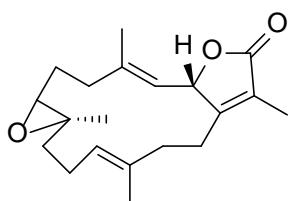

Colorless oil,  $[\alpha]_{\text{D}}^{26} +97^\circ$  (c 0.01,  $\text{CHCl}_3$ );  $^1\text{H}$ -NMR ( $\text{CDCl}_3$ , 500 MHz),  $\delta$  5.56 (1H, d), 5.13 (1H, m), 5.03 (1H, d), 0.8 (1H, m), 2.67 (1H, m), 2.36 (1H, brs), 2.28 (1H, m), 2.07 (1H, m), 2.02 (1H, m), 1.96 (1H, m), 1.92 (1H, d), 1.89 (3H, s), 1.85 (3H, s), 1.66 (1H, d), 1.62 (3H, s), 1.28 (3H, s), 1.09 (1H, m);  $^{13}\text{C}$ -NMR ( $\text{CDCl}_3$ , 125 MHz)  $\delta$  174.6 (s), 162.3 (s), 144.0 (s), 135.5 (s), 124.9 (d), 122.8 (s), 120.6 (d), 78.8 (d), 61.4 (d), 59.9 (s), 39.0 (t), 37.4 (t), 36.4 (t), 27.5 (t), 25.2 (t), 23.0 (t), 22.9 (q), 17.2 (q), 16.1 (q), 15.4 (q); EI-MS  $m/z$  316  $[\text{M}]^+$ .

#### 5 Sarcophinone (9)

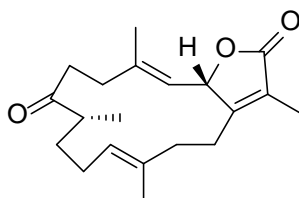

Colorless oil,  $[\alpha]_{\text{D}}^{20} +5^\circ$  (c 2.2,  $\text{CHCl}_3$ );  $^1\text{H}$ -NMR ( $\text{CDCl}_3$ , 500 MHz)  $\delta$  5.43 (1H, d,  $J=9.5$  Hz), 4.95 (1H, d,  $J=9.5$  Hz), 4.83 (1H, m), 2.74 (1H, m), 2.35 (2H, m), 2.35 (2H, m), 2.18 (1H, m), 2.14 (1H, m), 2.08 (1H, m), 2.04 (1H, m), 1.92 (1H, m), 1.86 (1H, m), 1.82 (3H, s), 1.80 (3H, s), 1.67 (1H, m), 1.56 (3H, s), 1.56 (1H, m), 1.17 (3H, d,  $J=6.5$  Hz), 1.08 (1H, m);  $^{13}\text{C}$ -NMR ( $\text{CDCl}_3$ , 125 MHz)  $\delta$  213.3 (s), 175.0 (s), 162.9 (s), 142.0 (s), 134.9 (s), 124.1 (d), 122.2 (d), 122.1 (s), 78.9 (d), 46.7 (d), 37.9 (t), 36.2 (t), 32.8 (t), 32.1 (t), 26.5 (t), 26.1 (t), 18.8 (q), 16.2 (q), 16.0 (q), 9.0 (q); EI-MS  $m/z$  316  $[\text{M}]^+$ .

#### 6 7 $\alpha$ -hydroxy- $\Delta^{8(19)}$ -deepoxysarcophine (10)

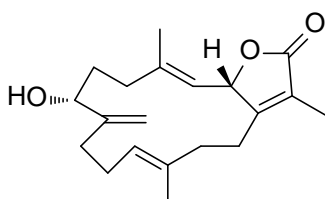

Colorless oil,  $[\alpha]_{\text{D}}^{25.6} +5^\circ$  (*c* 2.2,  $\text{CHCl}_3$ );  $^1\text{H-NMR}$  ( $\text{CDCl}_3$ , 500 MHz),  $\delta$  5.1 (1H, m), 5.09 (1H, brs), 4.95 (1H, brs), 4.11 (1H, s), 2.71 (1H, m), 2.44 (1H, ddd,  $J=13.8$  Hz, 12.8 Hz, 3.8 Hz), 2.34 (1H, m), 2.23 (1H, m), 2.19 (1H, m), 2.18 (1H, m), 2.16 (1H, m), 2.12 (1H, m), 2.06 (1H, m), 2.02 (1H, m), 1.91 (3H, s), 1.91 (1H, m), 1.86 (3H, s), 1.64 (3H, s), 1.41 (1H, m);  $^{13}\text{C-NMR}$  ( $\text{CDCl}_3$ , 125 MHz)  $\delta$  174.9(s), 162.6 (s), 154.5 (s), 143.6 (s), 134.9 (s), 125.8 (d), 123.0 (s), 121.4 (d), 109.9 (t), 78.7 (d), 70.5 (d), 36.8 (t), 36.0 (t), 33.8 (t), 32.1 (t), 29.9 (t), 26.3 (t), 16.0 (q), 15.4 (q), 8.9 (q); EI-MS  $m/z$  316  $[\text{M}]^+$ .

### 7 4 $\beta$ -hydroxy- $\Delta^{2(3)}$ -sarcophine (11)

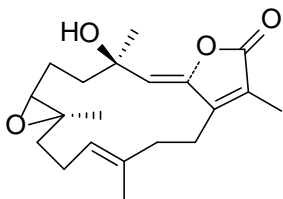

Colorless oil,  $[\alpha]_{\text{D}}^{25} -2^\circ$  (*c* 0.7,  $\text{CHCl}_3$ );  $^1\text{H-NMR}$  ( $\text{CDCl}_3$ , 500 MHz),  $\delta$  5.45 (1H, s), 5.01 (1H, t), 2.70 (1H, m), 2.56 (2H, m), 2.45 (1H, m), 2.30 (1H, m), 2.10 (1H, m), 2.09 (1H, m), 2.00 (1H, m), 1.97 (3H, s), 1.95 (1H, m), 1.85 (1H, m), 1.70 (1H, m), 1.65 (3H, s), 1.65 (1H, m), 1.53 (3H, s), 1.26 (3H, s);  $^{13}\text{C-NMR}$  ( $\text{CDCl}_3$ , 125 MHz)  $\delta$  170.2 (s), 151.9 (s), 147.8 (s), 133.3 (s), 128.1 (d), 123.5 (s), 117.6 (d), 72.6 (s), 61.6 (s), 60.5 (d), 39.6 (t), 37.6 (t), 35.8 (t), 29.6 (q), 23.5 (t), 22.9 (t), 22.7 (t), 18.8 (q), 16.4 (q), 9.0 (q); EI-MS  $m/z$  332  $[\text{M}]^+$ .

### 8 7 $\alpha$ ,8 $\beta$ -dihydroxydepoxy-sarcophine (12)

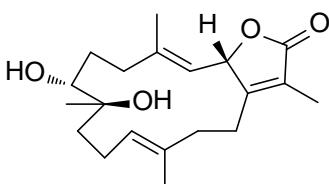

Colorless oil,  $[\alpha]_{\text{D}}^{26} +5^\circ$  (*c* 0.01,  $\text{CHCl}_3$ );  $^1\text{H-NMR}$  ( $\text{CDCl}_3$ , 500 MHz),  $\delta$  5.77 (1H, d,  $J=10$  Hz), 4.83 (1H, d,  $J=10$  Hz), 4.13 (2H, m), 4.01 (1H, m), 3.87 (1H, m), 2.64 (1H, m), 2.20 (1H, m), 2.20 (1H, m), 2.01 (1H, m), 2.00 (1H, m), 1.96 (1H, m), 1.82 (1H, s), 1.80 (3H, s), 1.75 (3H, s), 1.58 (3H, s), 1.35 (1H, m), 0.98 (3H, s);  $^{13}\text{C-NMR}$  ( $\text{CDCl}_3$ , 125 MHz)  $\delta$  174.7 (s), 164.8 (s), 144.3 (s), 133.5 (s), 125.2 (d), 121.2 (d), 121.5 (d), 79.3 (d), 74.1 (s), 71.6 (s), 70.9 (d), 37.4 (t), 36.2 (t), 29.5 (t), 27.7 (d), 26.6 (t), 26.2 (t), 25.0 (q), 19.3 (q), 16.0 (q), 9.0 (q); EI-MS  $m/z$  334  $[\text{M}]^+$ .

### 9 1,15 $\beta$ -epoxy-2-*epi*-16-deoxysarcophine (13)

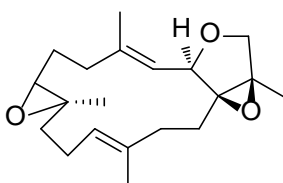

Colorless oil,  $[\alpha]_{\text{D}}^{25.9} -25^\circ$  (*c* 2.2,  $\text{CHCl}_3$ );  $^1\text{H-NMR}$  ( $\text{CDCl}_3$ , 500 MHz),  $\delta$  5.28 (1H, d,  $J=11$  Hz), 5.13 (1H, m), 4.88 (1H, d,  $J=11$  Hz), 3.92 (1H, d,  $J=10$  Hz), 3.38 (1H, d,  $J=10$  Hz), 2.67 (1H, dd), 2.35 (2H,

m), 2.34 (1H, m), 2.15 (2H, m), 1.95 (1H, m), 1.70 (2H, m), 1.62 (2H, m), 1.45 (3H, s), 1.29 (2H, d);  $^{13}\text{C}$ -NMR ( $\text{CDCl}_3$ , 125 MHz)  $\delta$  140.9 (s), 136.2 (s), 123.9 (d), 122.4 (d), 76.4 (d), 72.0 (s), 68.0 (s), 67.9 (t), 61.9 (d), 59.8 (s), 38.9 (t), 36.3 (t), 34.8 (t), 29.0 (t), 25.8 (t), 24.3 (t), 12.1 (q); EI-MS  $m/z$  322  $[\text{M}]^+$ .

### 10 Sarcophytol Q (14)

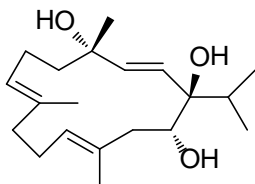

Colorless oil,  $[\alpha]_{\text{D}}^{32.5} -87^\circ$  (c 2.2,  $\text{CDCl}_3$ );  $^1\text{H}$ -NMR ( $\text{CDCl}_3$ , 500 MHz),  $\delta$  6.09 (1H, d,  $J=16.0\text{Hz}$ ), 5.81 (1H, d,  $J=16.0, 5.0\text{Hz}$ ), 5.36 (1H, t), 5.21 (1H, d), 4.08 (1H, dd), 2.38 (1H, m), 2.25 (1H, m), 2.01 (1H, m), 2.00 (2H, m), 1.99 (1H, m), 1.90 (1H, m), 1.88 (3H, s), 1.62 (3H, s), 1.55 (1H, m), 1.43 (3H, s), 1.06 (3H, d), 0.87 (3H, d);  $^{13}\text{C}$ -NMR ( $\text{CDCl}_3$ , 125 MHz)  $\delta$  136.8 (d), 132.9 (s), 128.8 (d), 128.5 (d), 128.1 (d), 79.8 (s), 72.4 (s), 70.2 (d), 46.0 (t), 43.7 (t), 38.9 (t), 32.4 (d), 32.4 (d), 22.4 (t), 17.9 (q), 16.8 (q), 15.8 (q), 14.8 (q); EI-MS  $m/z$  322  $[\text{M}]^+$ .

### 11 Lobocrasol (15)

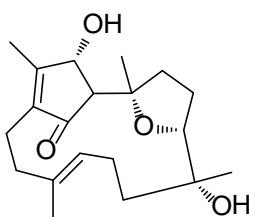

Colorless oil,  $[\alpha]_{\text{D}}^{20} -180^\circ$  (c 4.2,  $\text{CHCl}_3$ ); IR(KBr) $\nu_{\text{max}}$ : 3493, 2961, 2926, 2868, 1686, 1642, 1444, 1379, 1051, 1026, 910  $\text{cm}^{-1}$ ;  $^1\text{H}$  NMR ( $\text{CDCl}_3$ , 500 MHz)  $\delta$  4.70 (1H, s, H-2), 2.00 (1H, s, H-3), 2.85-2.80 (2H, m, H<sub>2</sub>-5), 1.94-1.90 (2H, m, H<sub>2</sub>-6), 3.65 (1H, dd,  $J = 5.4, 9.2\text{ Hz}$ ), 2.40 (1H, m, H-9a), 2.33 (1H, m, H-9b), 1.95 (1H, m, H-10a), 1.79 (1H, m, H-10b), 5.00 (1H, dd,  $J = 5.4, 9.2\text{ Hz}$ , H-11), 2.13 (1H, m, H-13a), 1.84 (1H, m, H-13b), 2.36 (1H, dt,  $J = 11.1, 12.7$ , H-14a), 1.79 (1H, m, H-14b), 1.99 (3H, s, H-17), 1.25 (3H, s, H-18), 0.87 (3H, s, H-19), 1.54 (3H, s, H-20);  $^{13}\text{C}$  NMR ( $\text{CDCl}_3$ , 125 MHz)  $\delta$  168.9 (C-1), 73.4 (C-2), 52.9 (C-3), 83.4 (C-4), 32.4 (C-5), 25.8 (C-6), 83.9 (C-7), 72.7 (C-8), 34.9 (C-9), 21.9 (C-10), 129.3 (C-11), 129.3 (C-12), 38.7 (C-13), 19.9 (C-14), 140.4 (C-15), 205.1 (C-16), 13.6 (C-17), 25.5 (C-18), 25.8 (C-19), 15.7 (C-20); HR-ESI-MS  $m/z$  357.2036 (calc. for  $\text{C}_{20}\text{H}_{30}\text{O}_4\text{Na}$ , 357.2036).

Figure S1. <sup>1</sup>H NMR data of sarcopholide B (1).

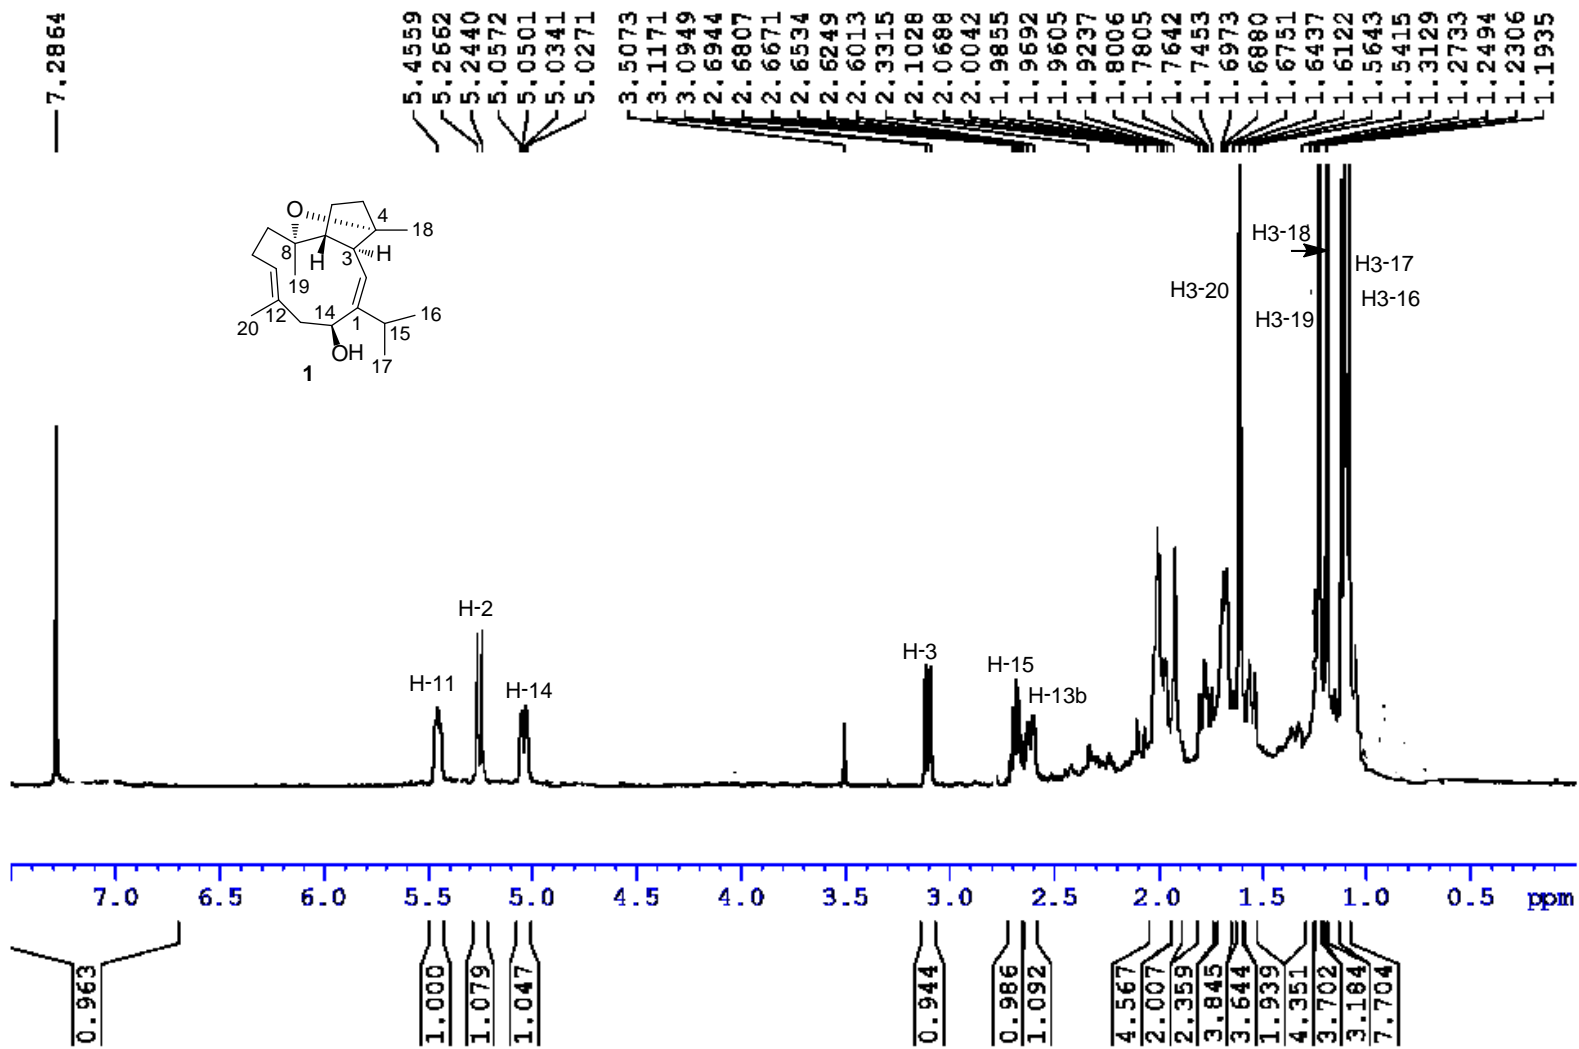

Figure S2.  $^{13}\text{C}$  NMR data of sarcophyllide B (1).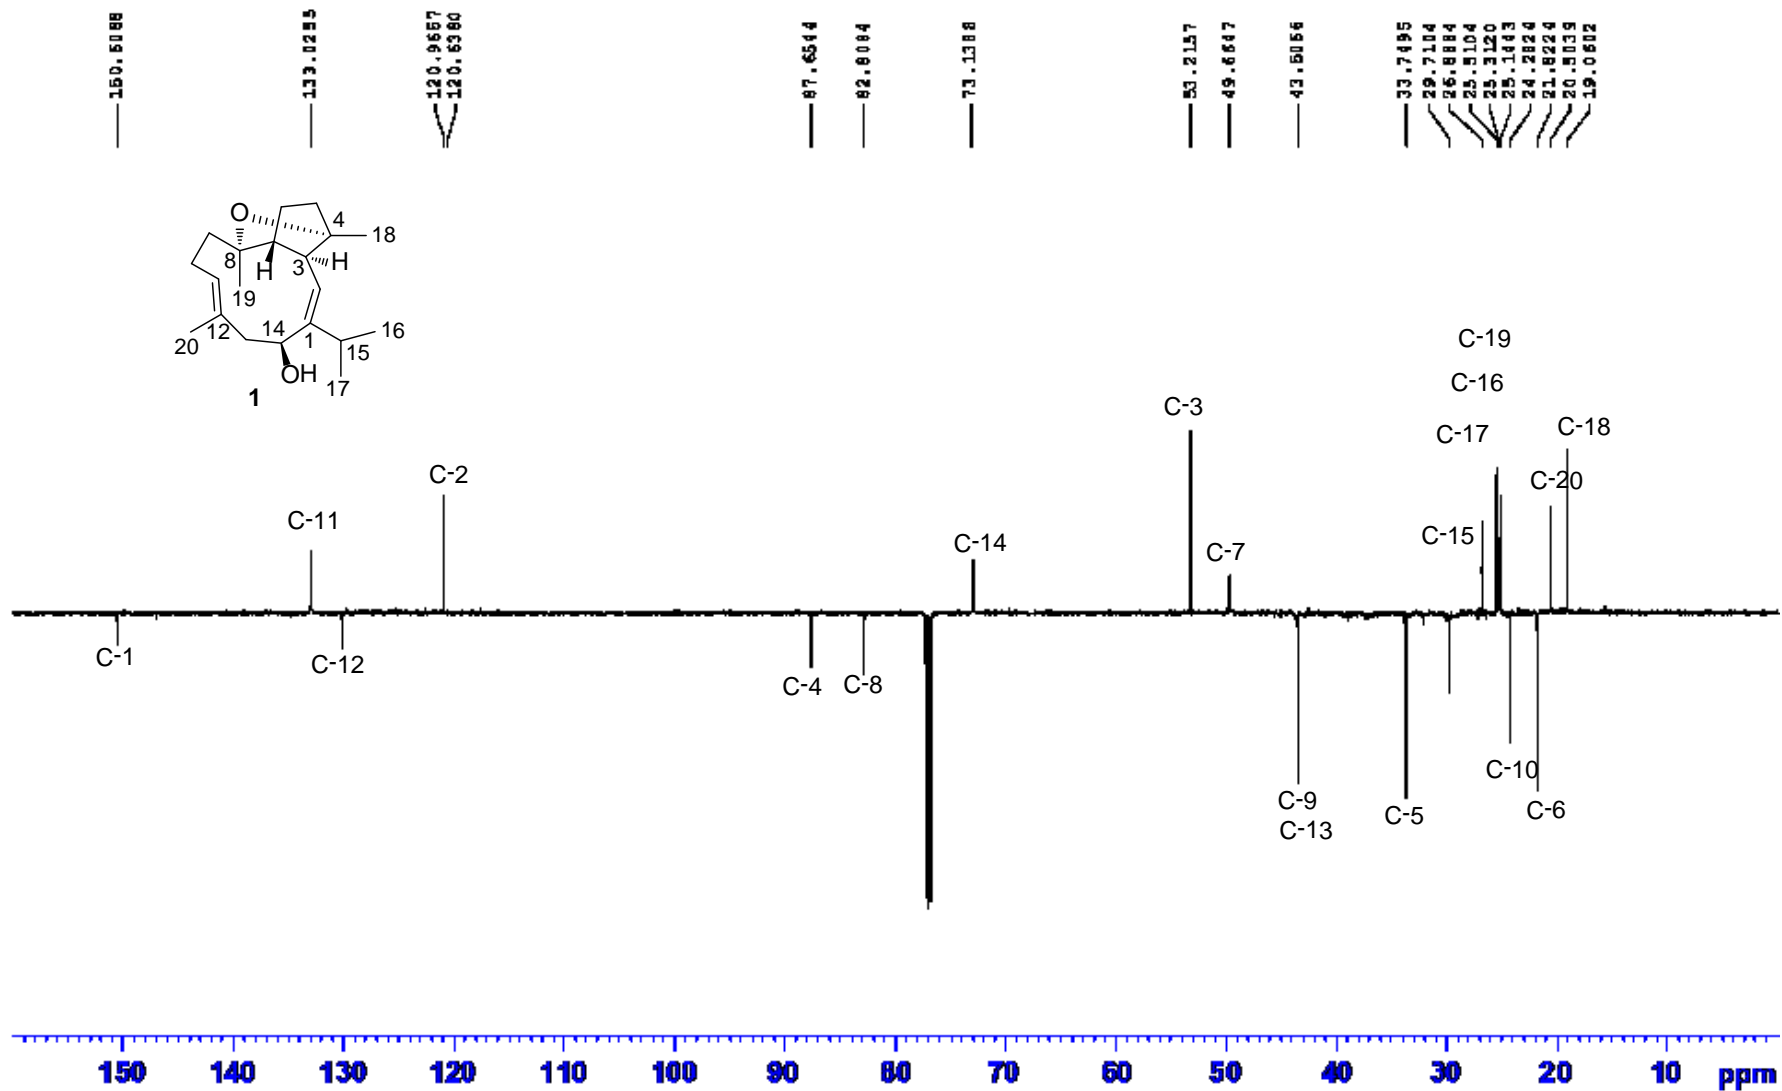

Figure S3. COSY spectrum of sarcophylide B (1).

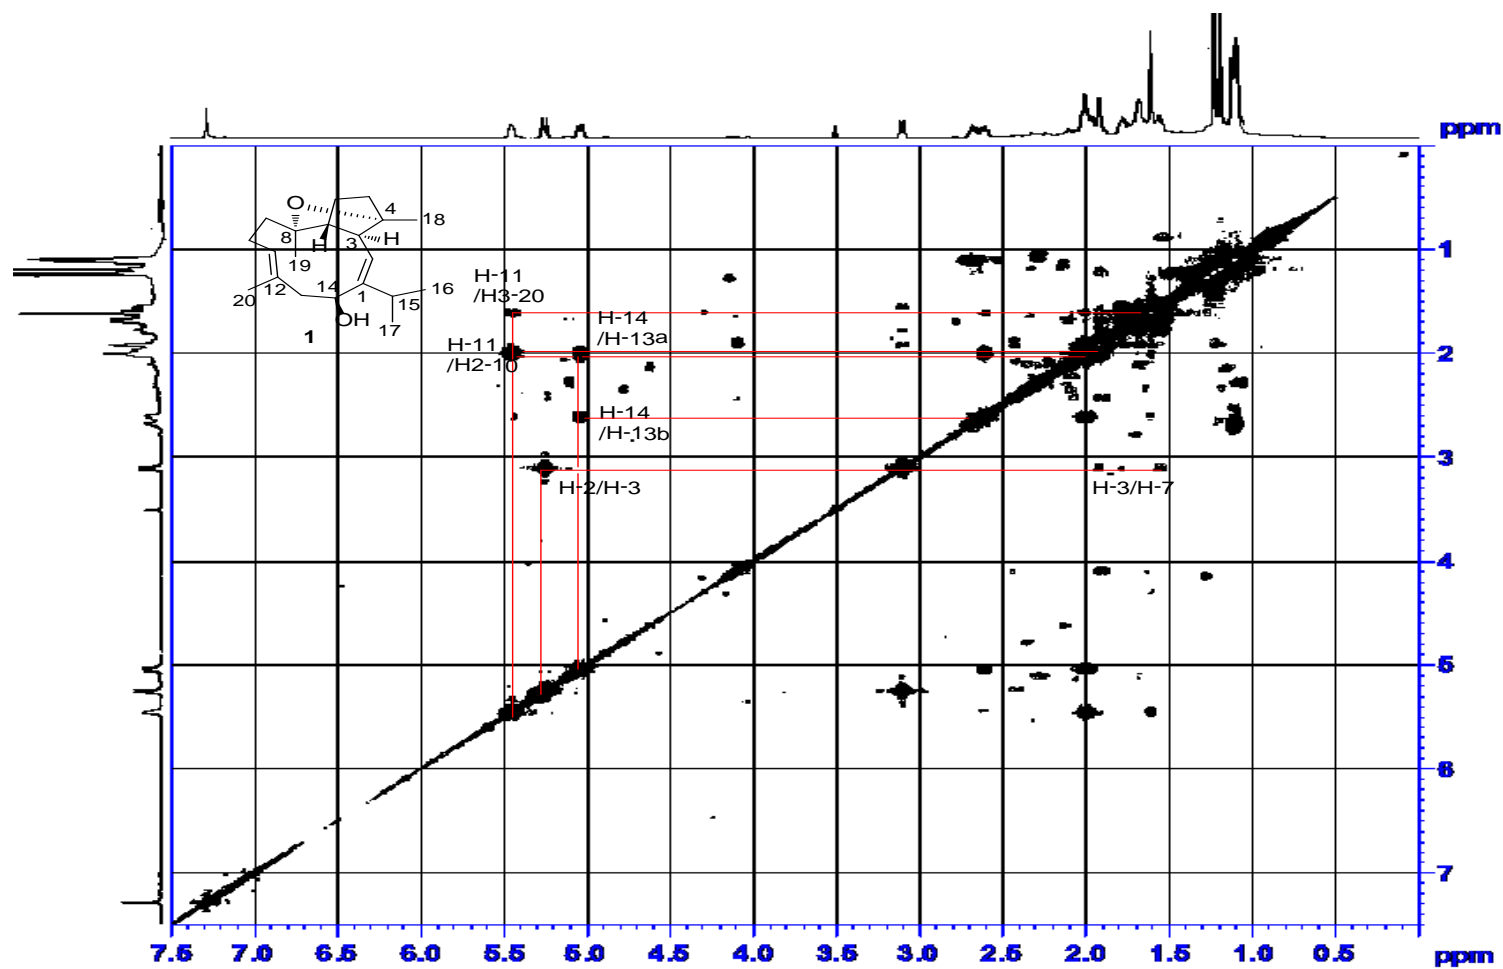



Figure S4. HMQC spectrum of sarcophylide B (1).

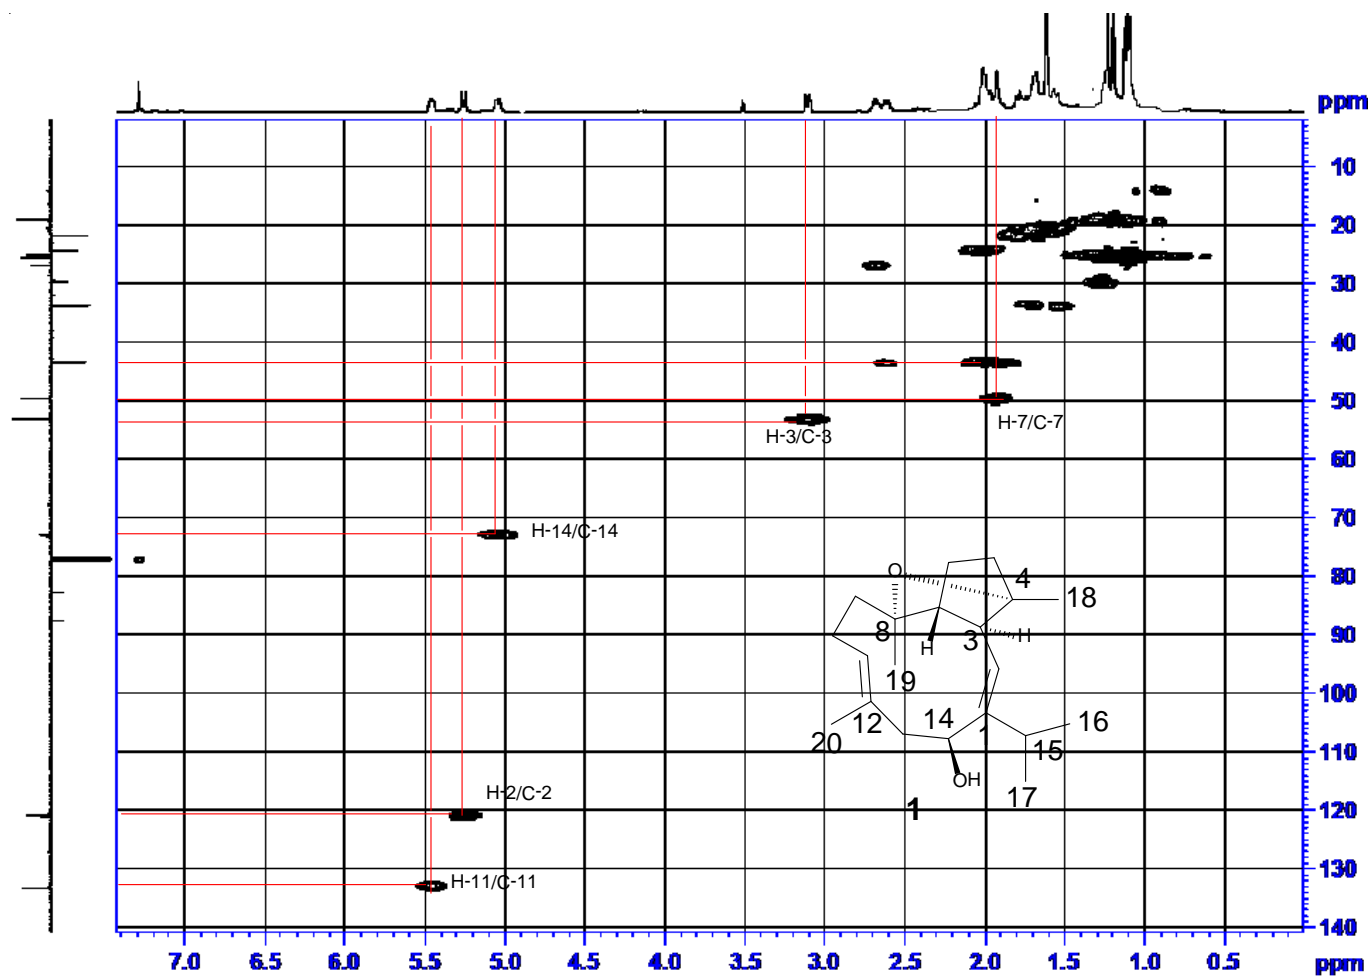

Figure S5. HMBC spectrum of sarcophyllide B (1).

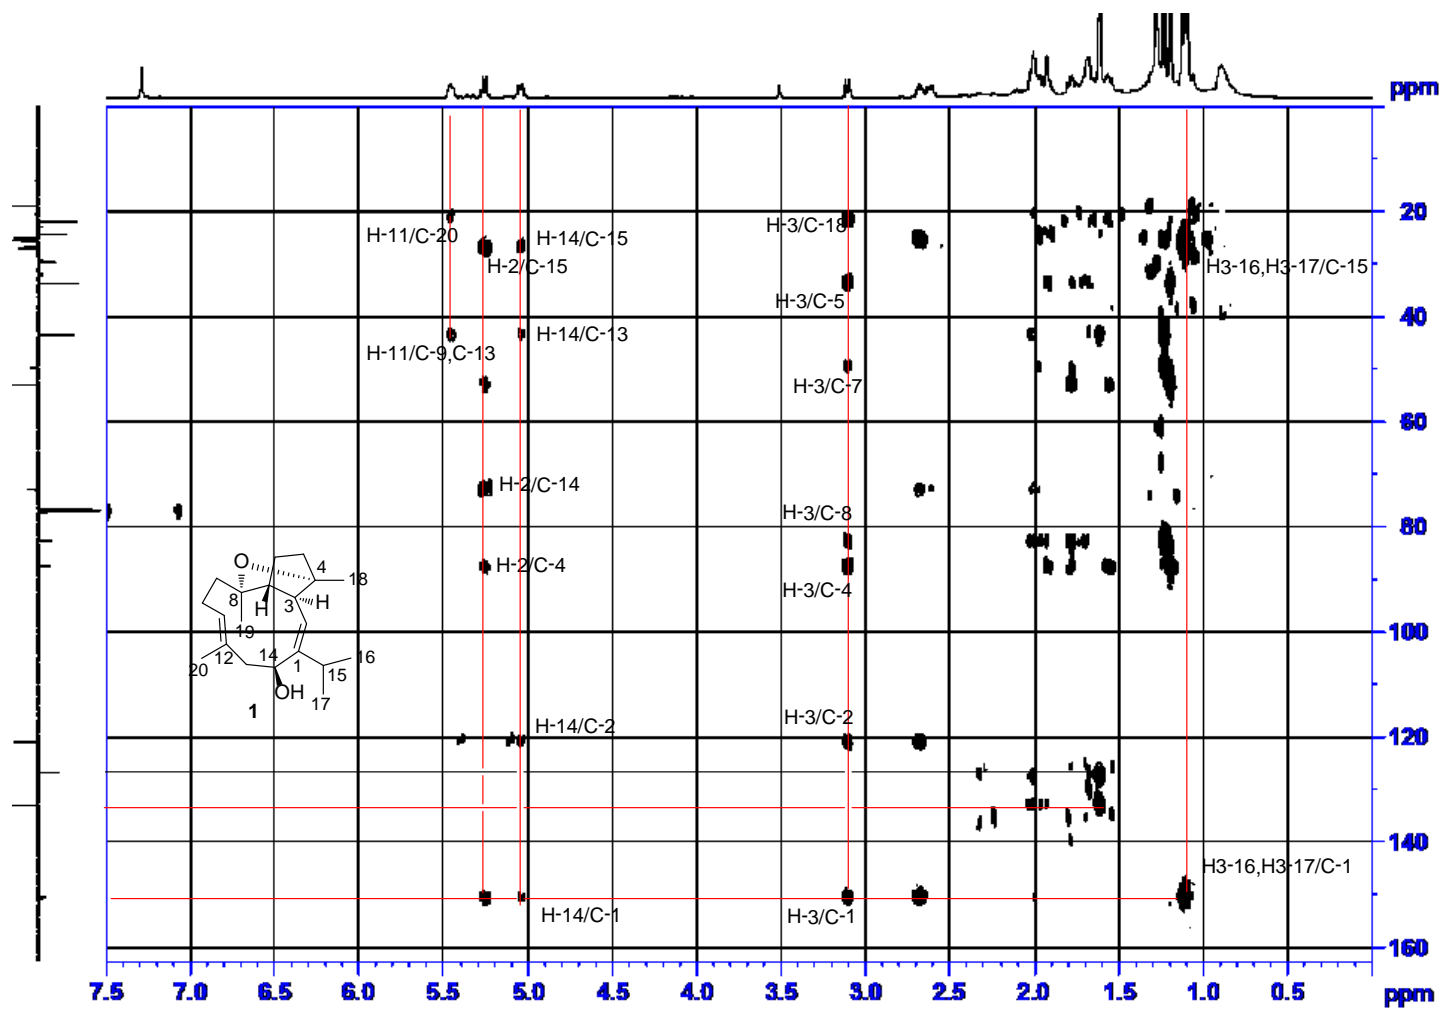

Figure S6. NOESY spectrum of sarcophylide B (1).

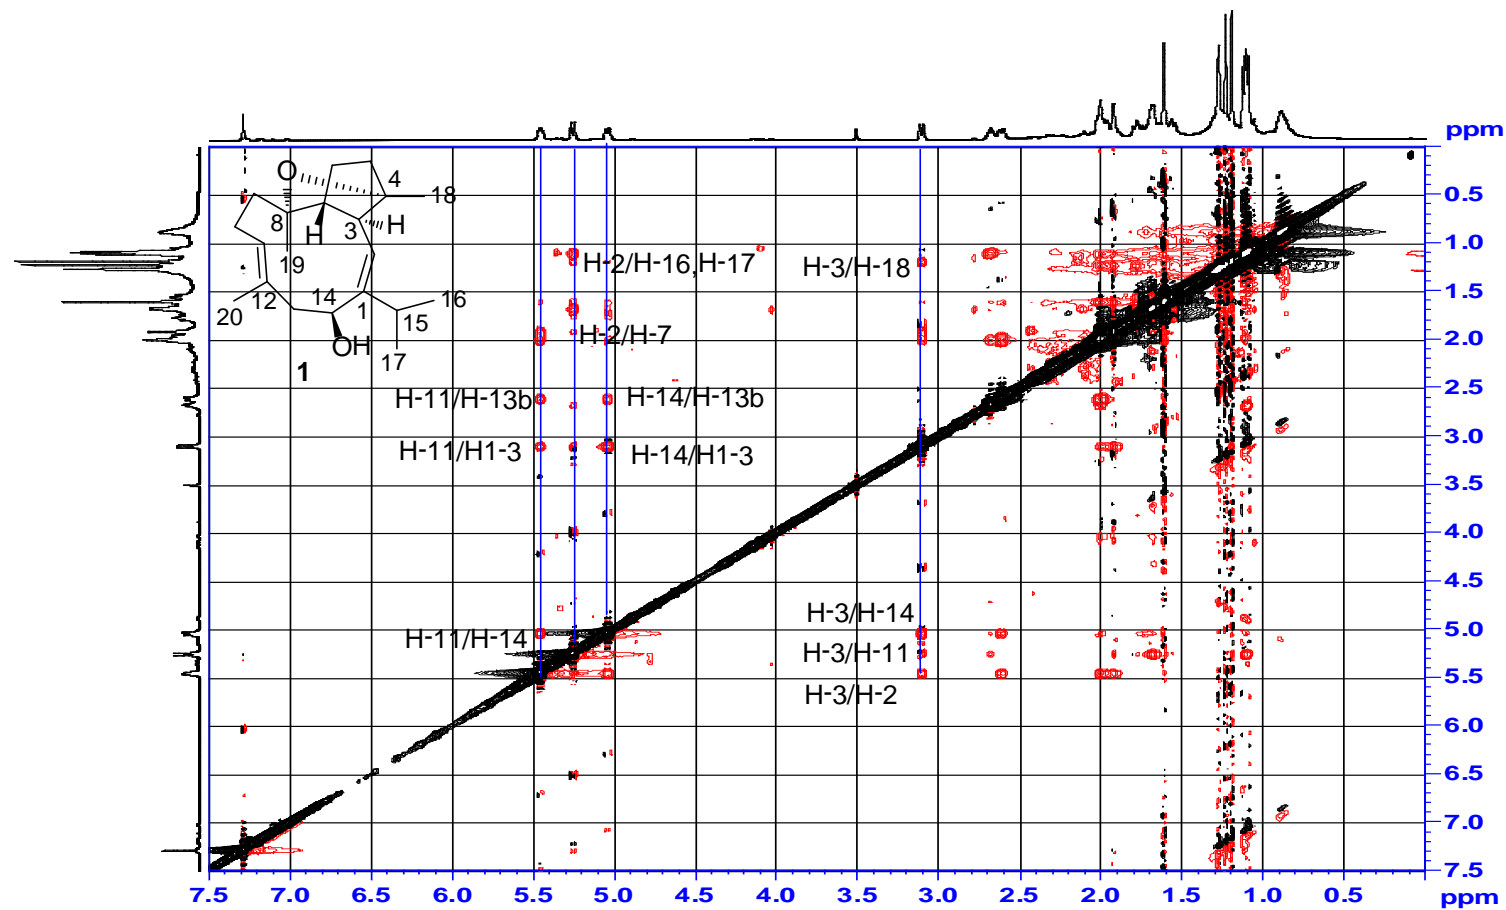

Figure S7. IR spectrum of sarcophyllide B (1).

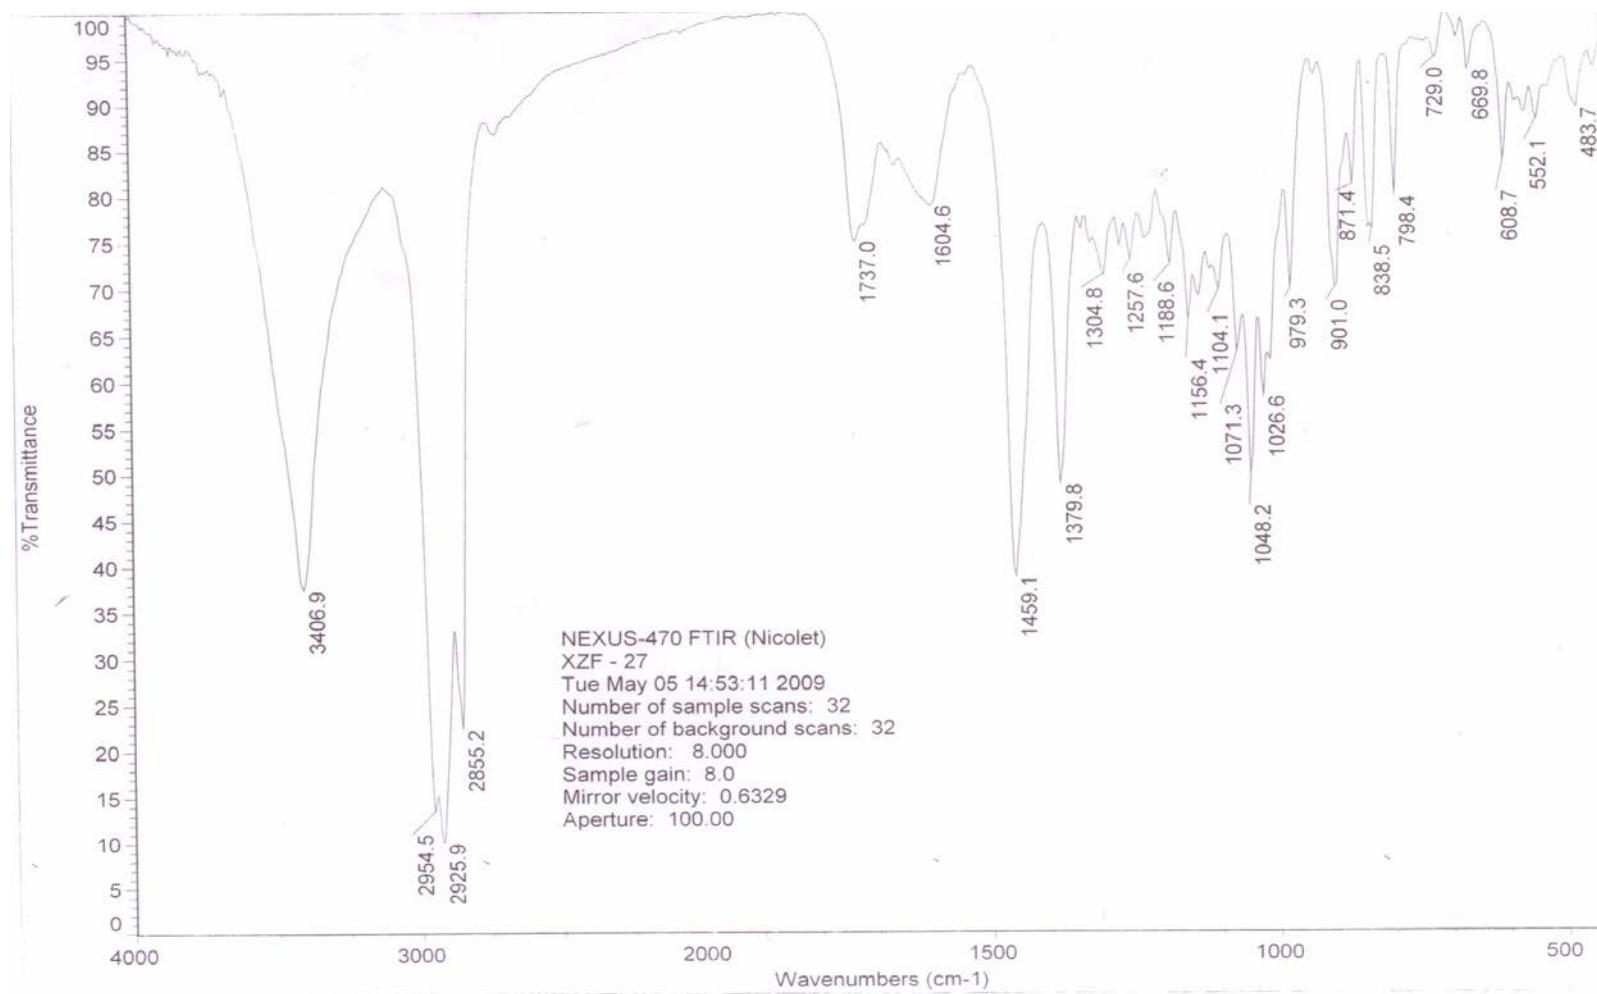

Figure S8. HRMS spectrum of sarcophyllide B (1).

| BJMU - BRUKER APEX IV FT-MS (7.0T) Spectrum Report |                                                                                                                                                                                                                      |                      |                     |                         |                                     |
|----------------------------------------------------|----------------------------------------------------------------------------------------------------------------------------------------------------------------------------------------------------------------------|----------------------|---------------------|-------------------------|-------------------------------------|
| <b>Analysis Info</b>                               | 北京大学医药卫生分析中心                                                                                                                                                                                                         |                      |                     | <b>Acquisition Date</b> | 1/15/2009 3:34:41 PM                |
| <b>Analysis Name</b>                               | C:\data_sample\ESI_090110_20\ESI_XZF_27_20090115\6                                                                                                                                                                   |                      |                     | <b>Operator</b>         | bpxsh@bjmu.edu.cn; Tel:010-82801437 |
|                                                    |                                                                                                                                                                                                                      |                      |                     | <b>Instrument</b>       | FT_MS_Bruker APEX IV (7.0 T)        |
| <b>Comment</b>                                     | ESI POS C20H32O2 MW 304.2402<br>CAL588; 226.16718;249.15695;340.25887;301.14158;<br>362.24081;391.28483;413.26647;453.34353;<br>475.32548;509.25407;509.25407;566.42760;<br>588.40954;679.51166;701.49361;826.47121; |                      |                     |                         |                                     |
| <b>Acquisition Result:</b>                         | <b>Exact Mass</b>                                                                                                                                                                                                    | <b>Measured Mass</b> | <b>Error ( mDa)</b> | <b>Error (ppm)</b>      | <b>Description</b>                  |
|                                                    | 305.24751                                                                                                                                                                                                            | 305.2473             | 0.21                | 0.68                    | M+H;-e                              |
|                                                    | 327.22945                                                                                                                                                                                                            | 327.2292             | 0.25                | 0.77                    | M +Na ;-e                           |

Table 'GenFormulaResults' could not be found in this analysis

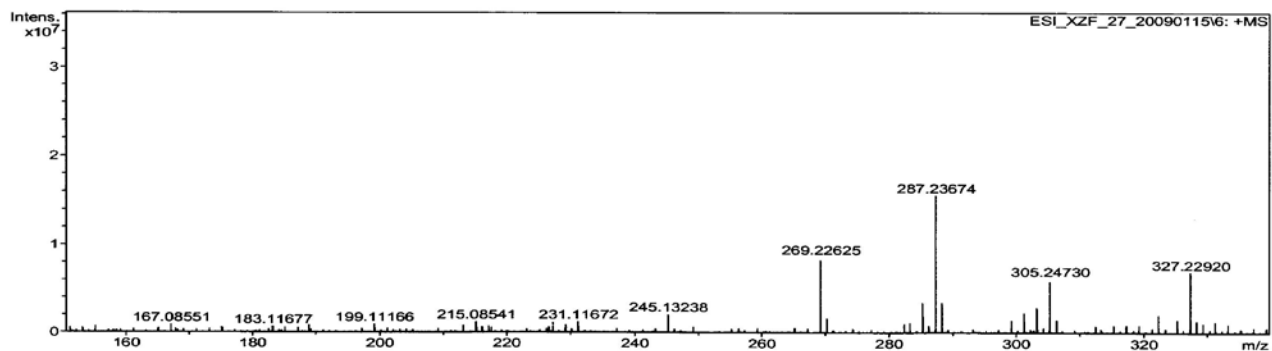

Figure S9.  $^1\text{H}$  NMR data of sarcophyllide C (2).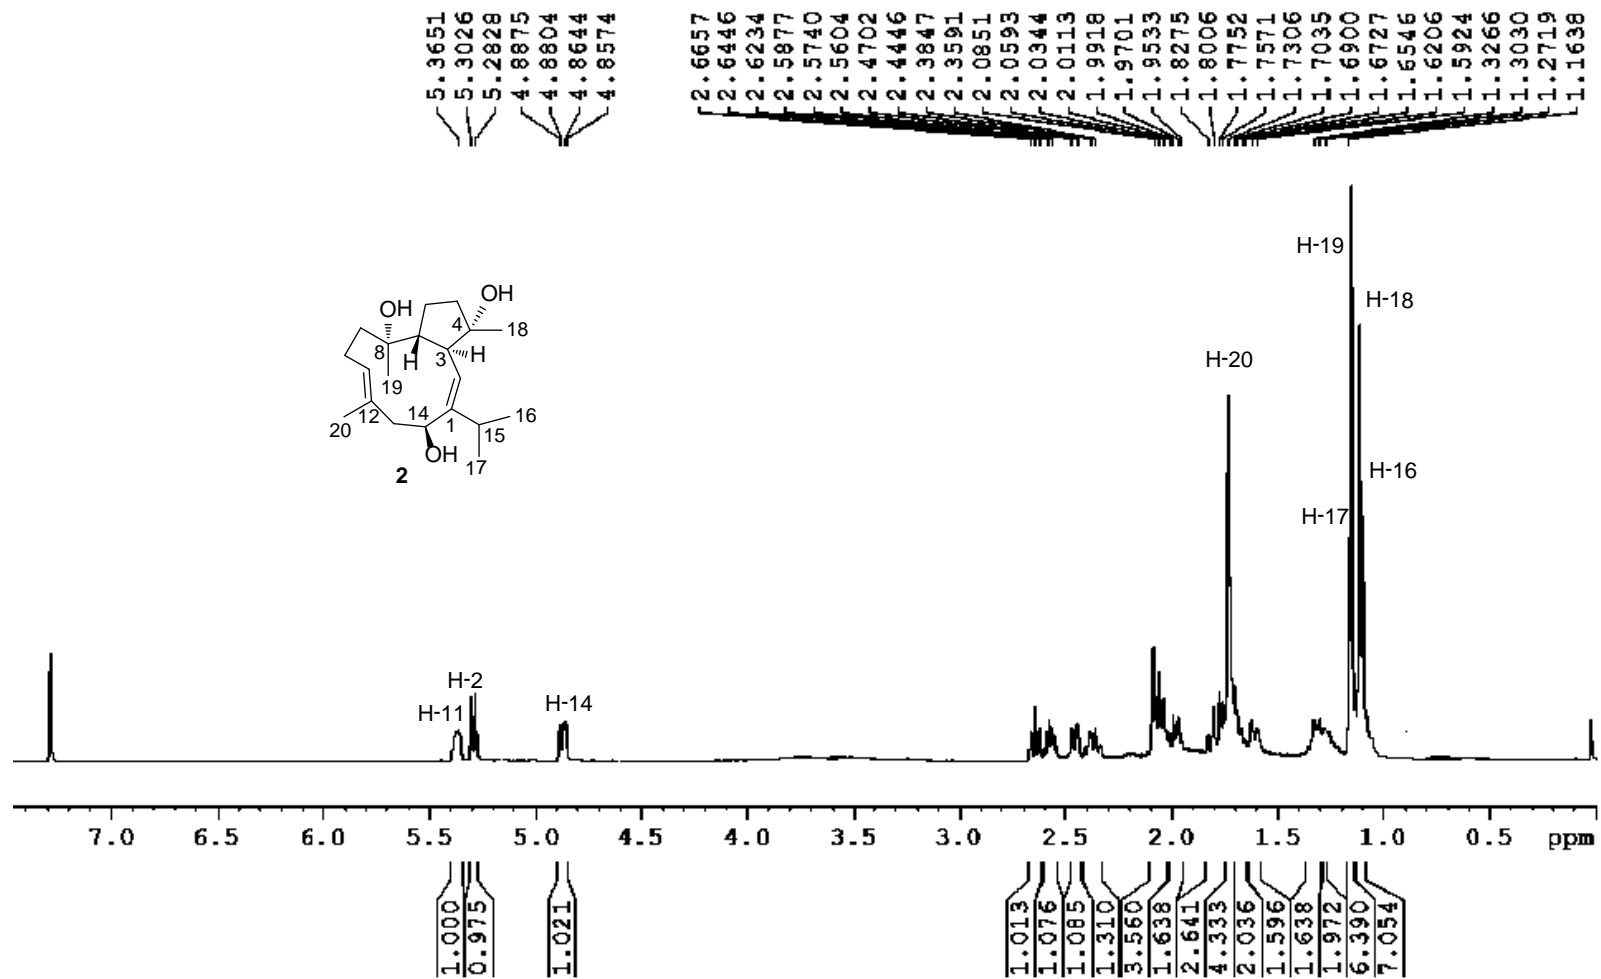

Figure S10.  $^{13}\text{C}$  NMR data of sarcophylide C (2).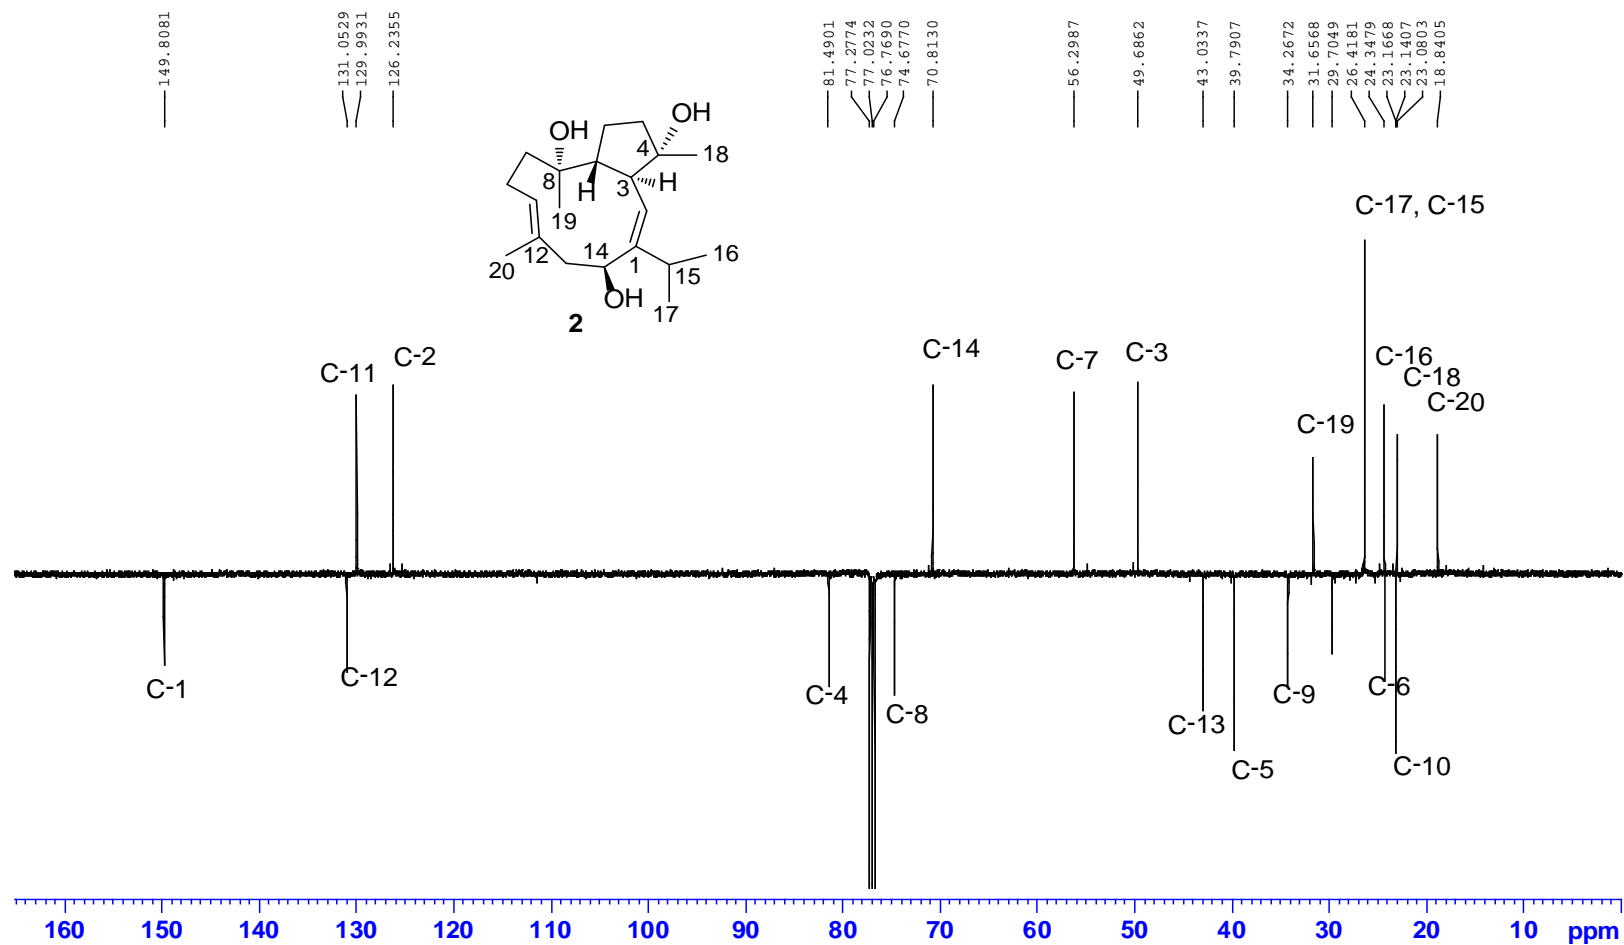

Figure S11. COSY spectrum of sarcophylide C (2).

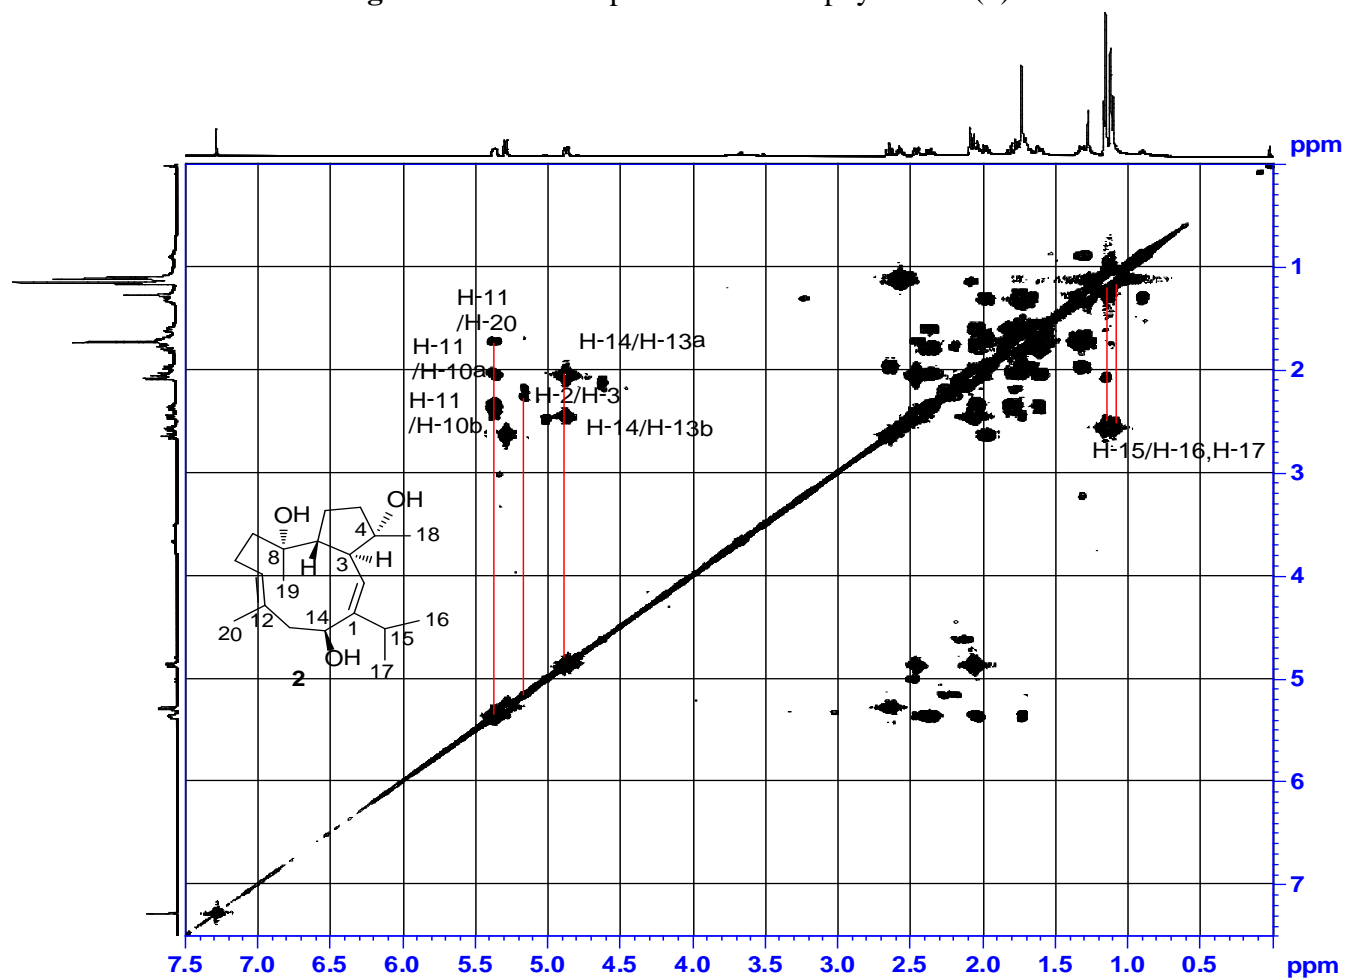



Figure S12. HMQC spectrum of sarcophylide C (2).

Avance 500 Bruker, A&T Center BNU  
sample: xzf-32 Solvent: cdcl3  
spectrum: 5 HMQC

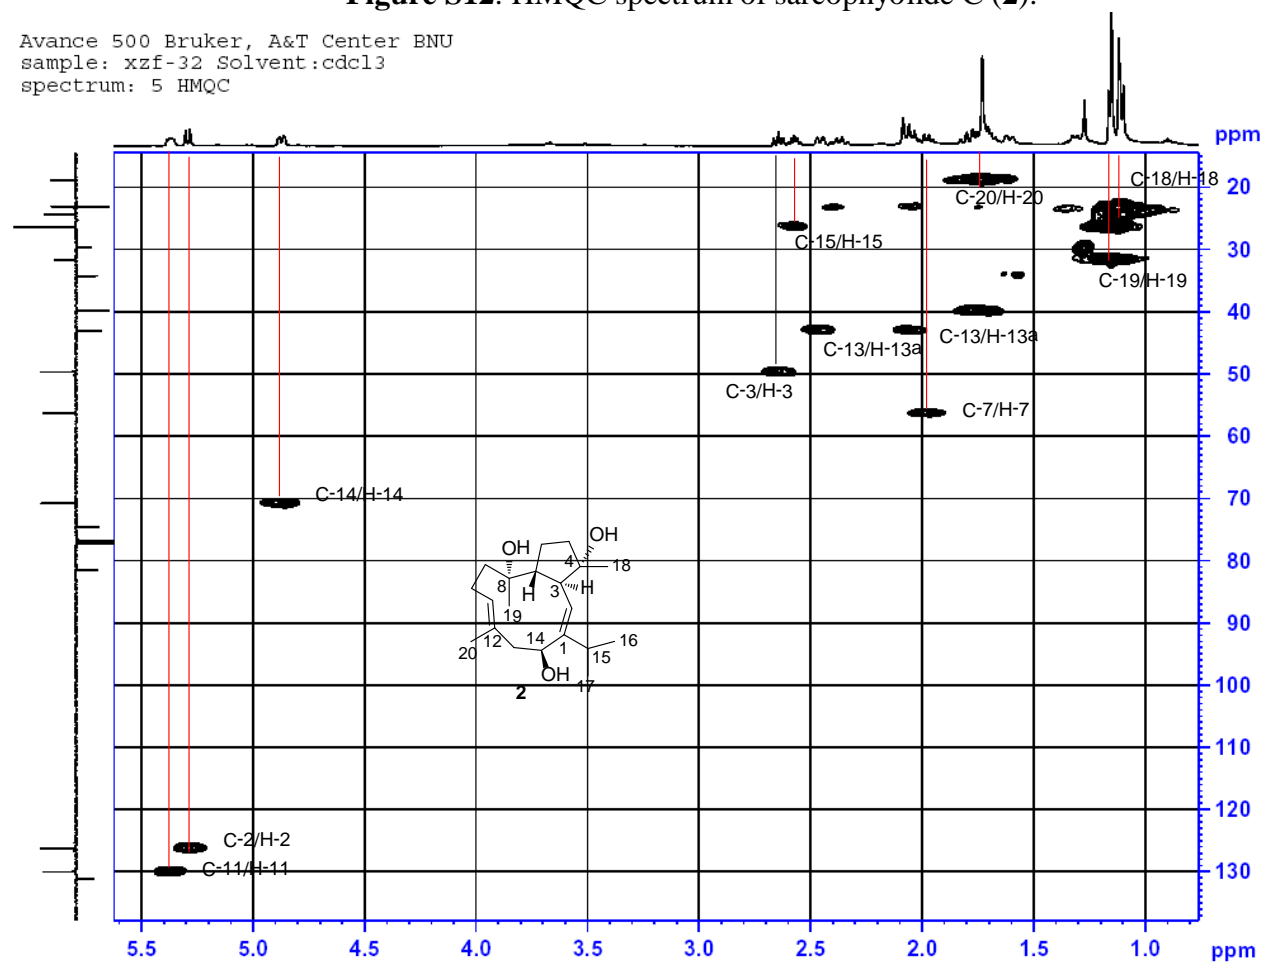

Figure S13. HMBC spectrum of sarcophyllide C (2).

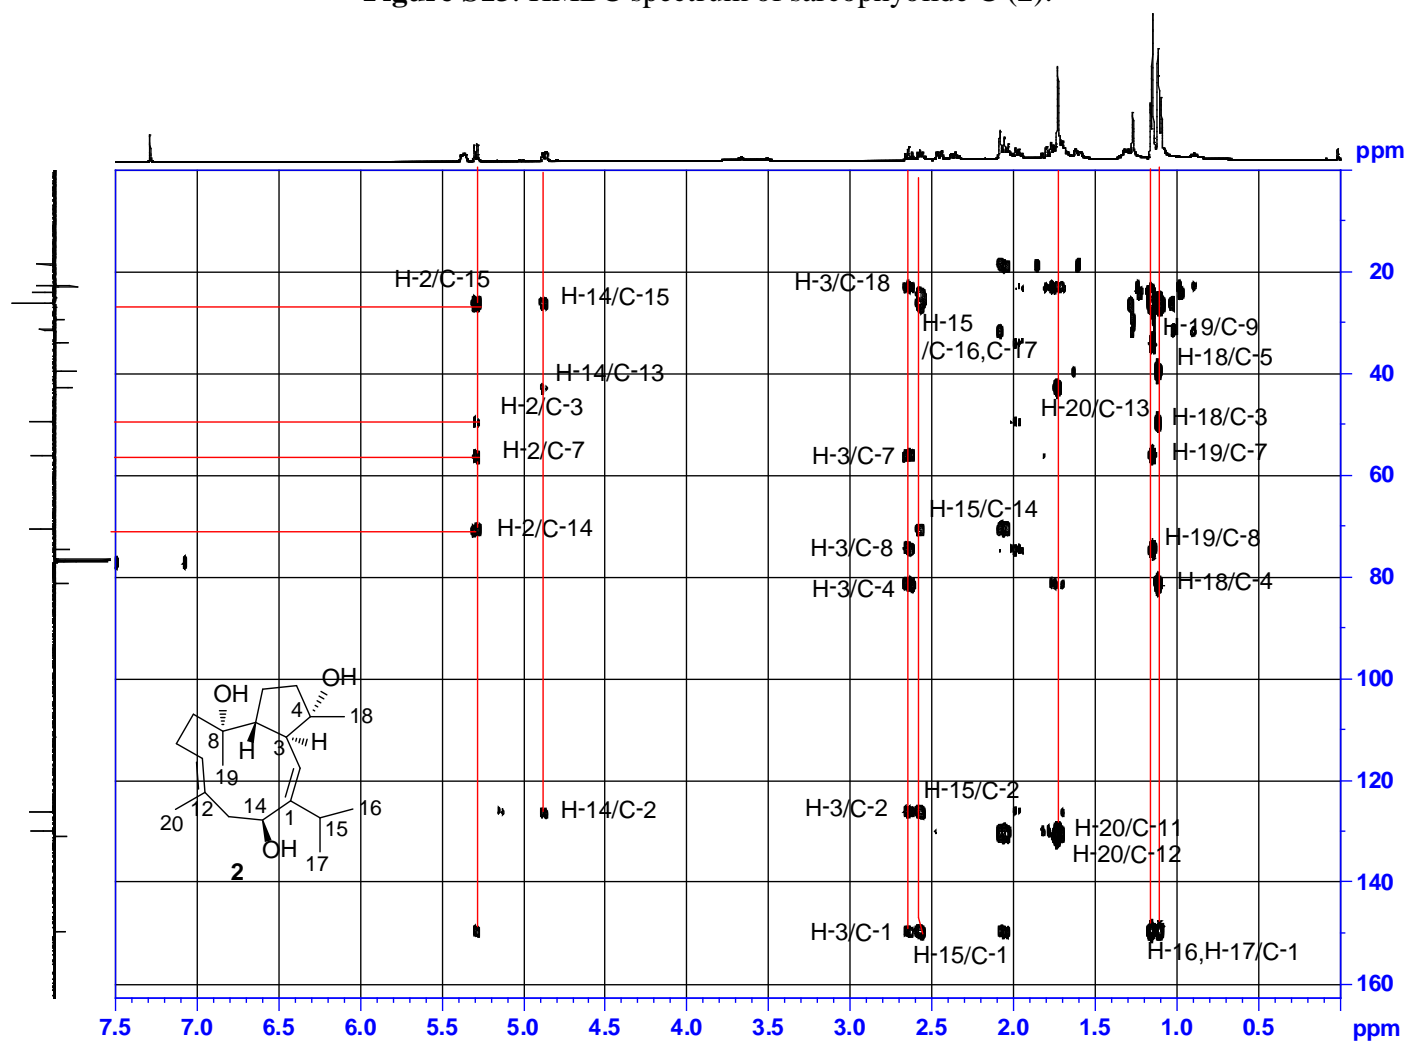

Figure S14. NOESY spectrum of sarcophylide C (2).

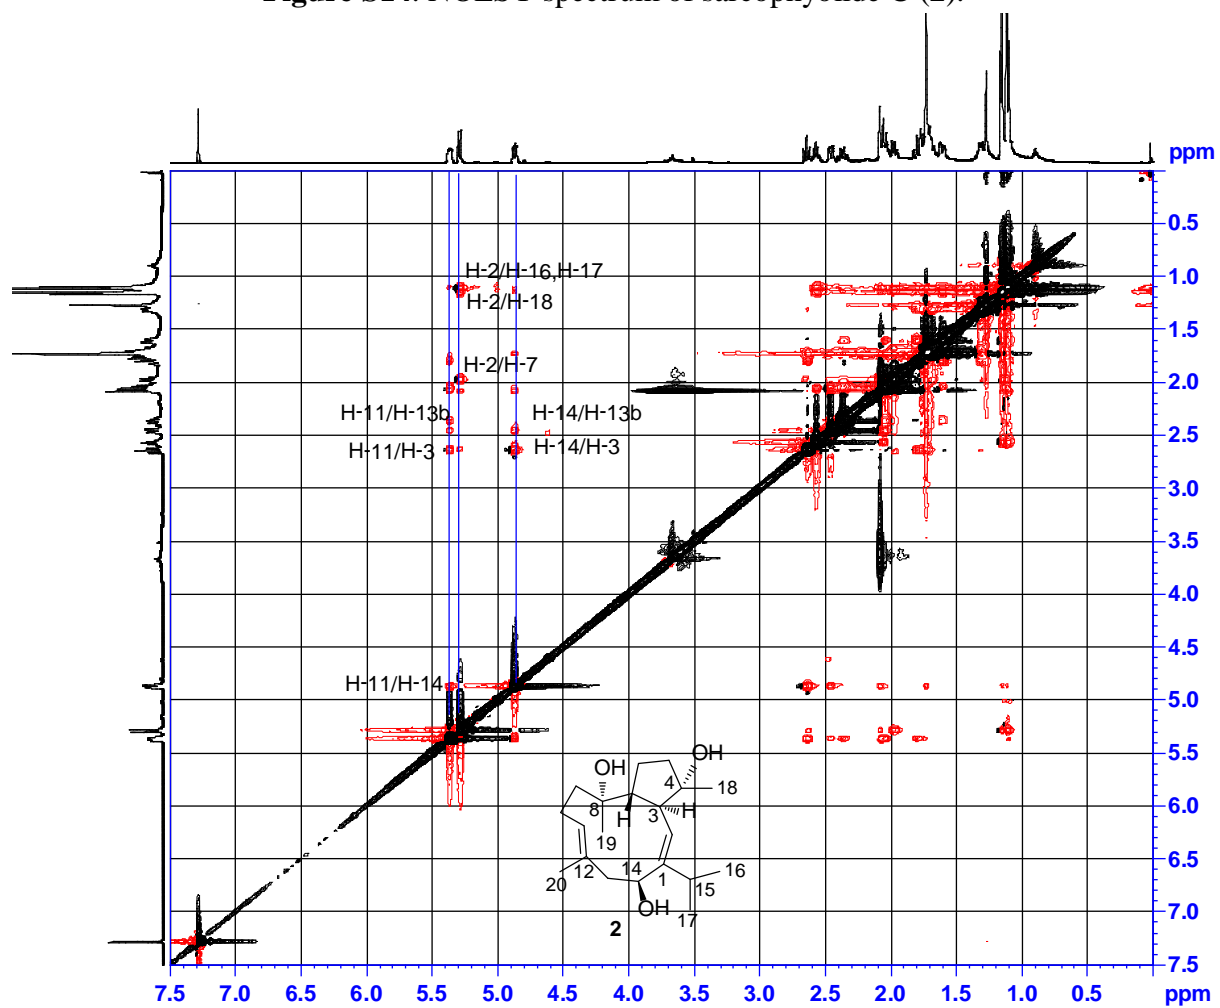

Figure S15. IR spectrum of sarcophyllide C (2).

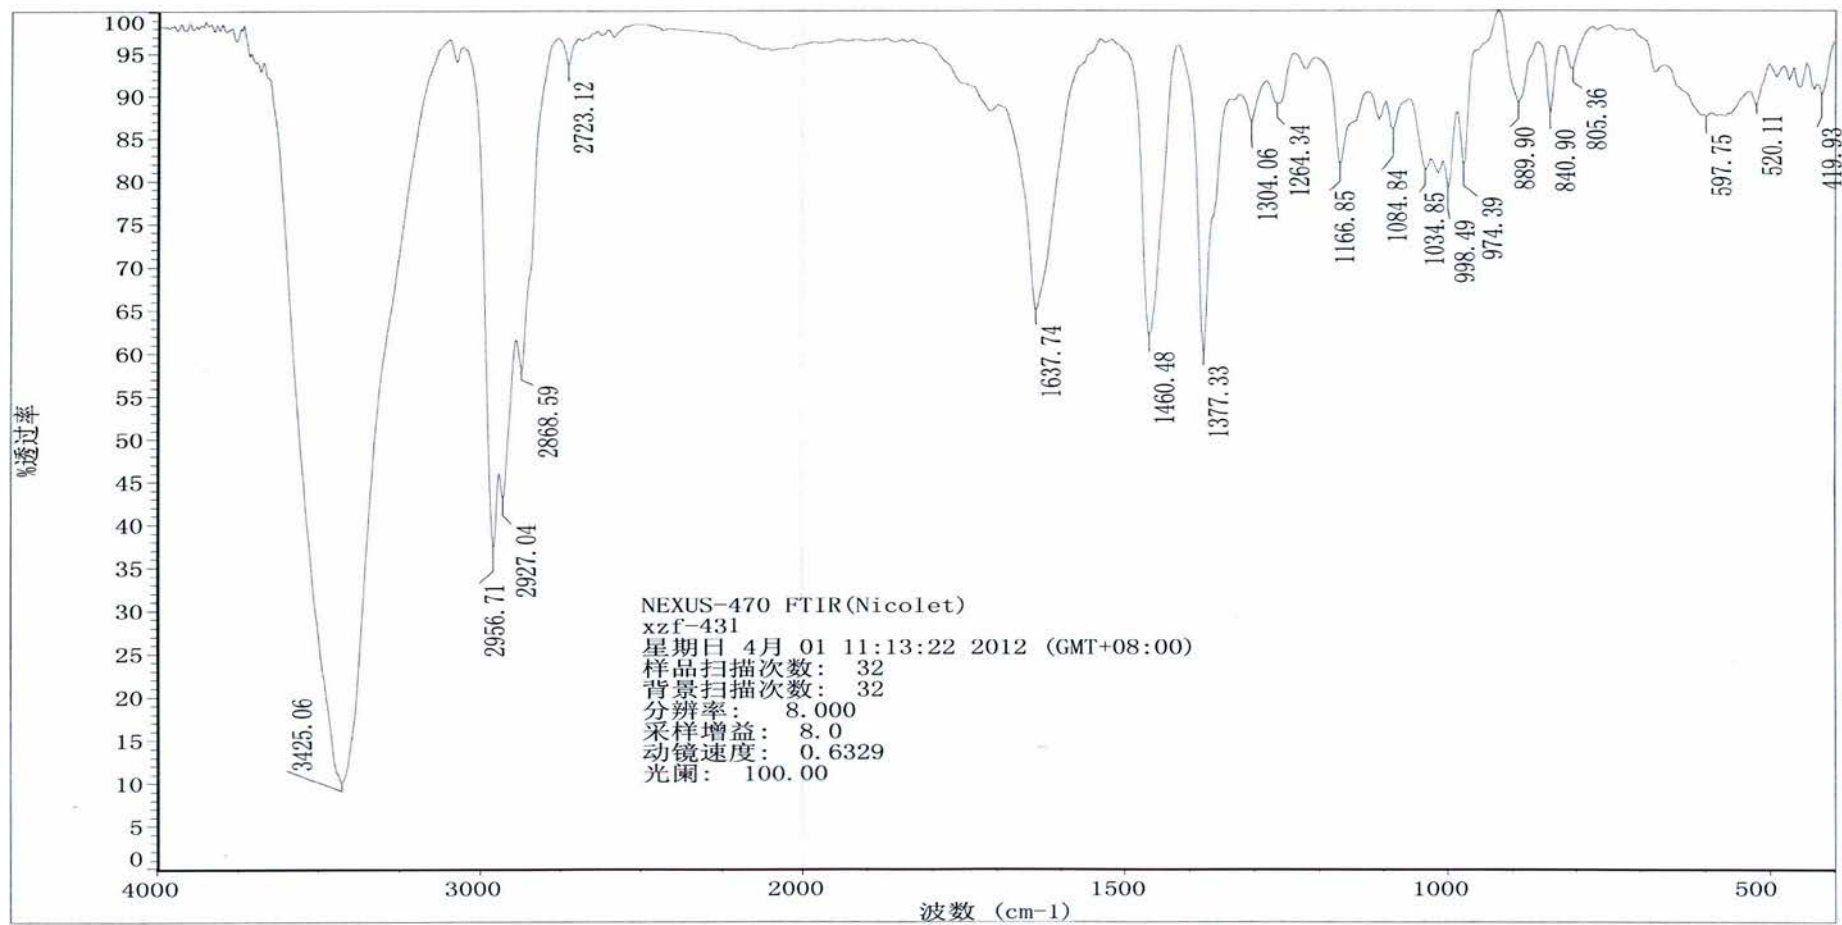

Figure S16. HRMS spectrum of sarcophyllide C (2).

| BJMU - BRUKER APEX IV FT-MS (7.0T) Spectrum Report |                                                                                                                                                                                                                      |                      |                     |                         |                                      |
|----------------------------------------------------|----------------------------------------------------------------------------------------------------------------------------------------------------------------------------------------------------------------------|----------------------|---------------------|-------------------------|--------------------------------------|
| <b>Analysis Info</b>                               | 北京大学医药卫生分析中心                                                                                                                                                                                                         |                      |                     | <b>Acquisition Date</b> | 1/15/2009 3:26:47 PM                 |
| <b>Analysis Name</b>                               | C:\data_sample\ESI_090110_20\ESI_XZF_32_20090115\5                                                                                                                                                                   |                      |                     | <b>Operator</b>         | bpfxsh@bjmu.edu.cn; Tel:010-82801437 |
|                                                    |                                                                                                                                                                                                                      |                      |                     | <b>Instrument</b>       | FT_MS_Bruker APEX IV (7.0 T)         |
| <b>Comment</b>                                     | ESI POS C20H34O3 MW 322.2508<br>CAL588; 226.16718;249.15695;340.25887;301.14158;<br>362.24081;391.28483;413.26647;453.34353;<br>475.32548;509.25407;509.25407;566.42760;<br>588.40954;679.51166;701.49361;826.47121; |                      |                     |                         |                                      |
| <b>Acquisition Result:</b>                         | <b>Exact Mass</b>                                                                                                                                                                                                    | <b>Measured Mass</b> | <b>Error ( mDa)</b> | <b>Error (ppm)</b>      | <b>Description</b>                   |
|                                                    | 345.24002                                                                                                                                                                                                            | 345.24066            | -0.64               | -1.87                   | M +Na ;-e                            |

Table 'GenFormulaResults' could not be found in this analysis

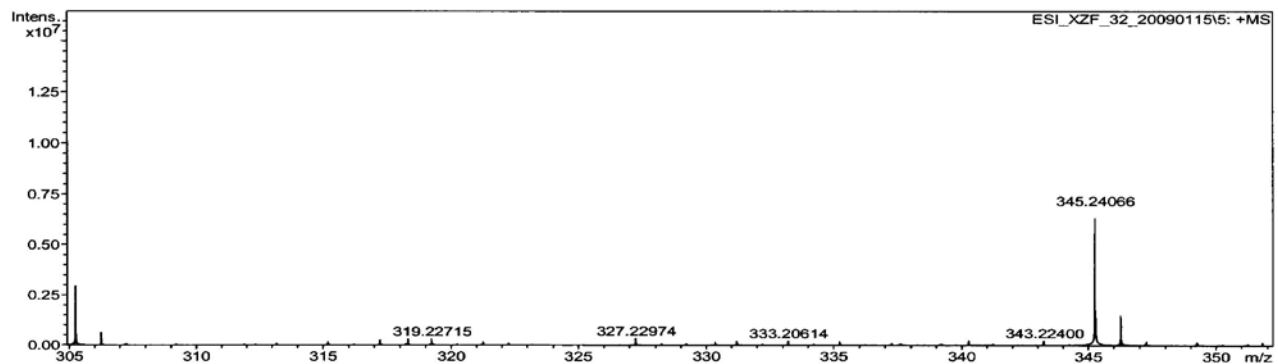

Figure S17.  $^1\text{H}$  NMR data of sarcophylide D (3).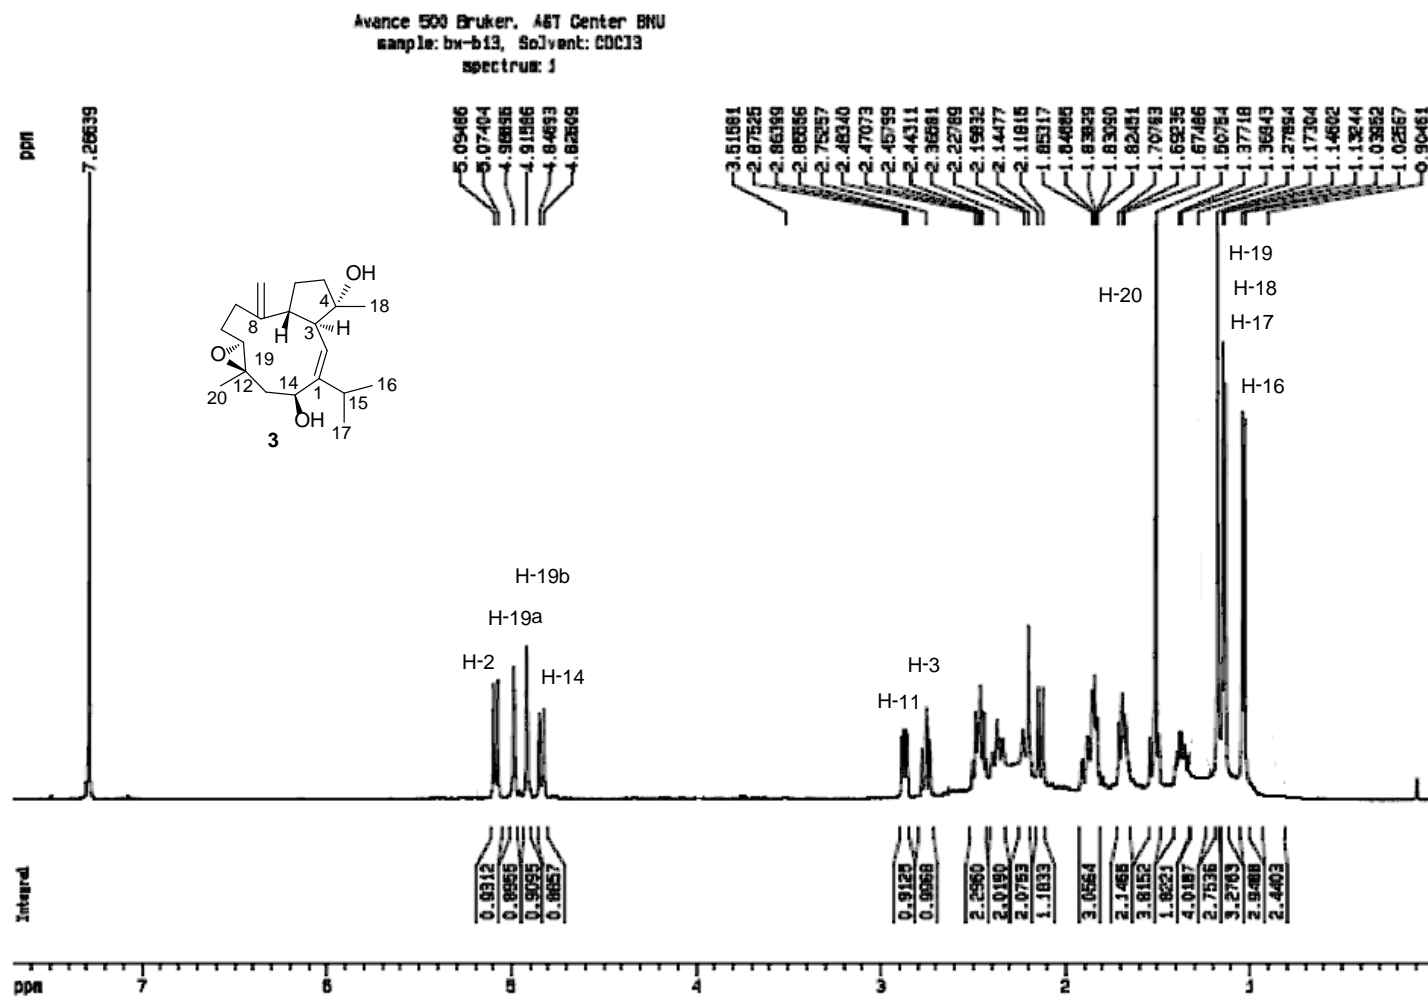

Figure S18.  $^{13}\text{C}$  NMR data of sarcophyllide D (3).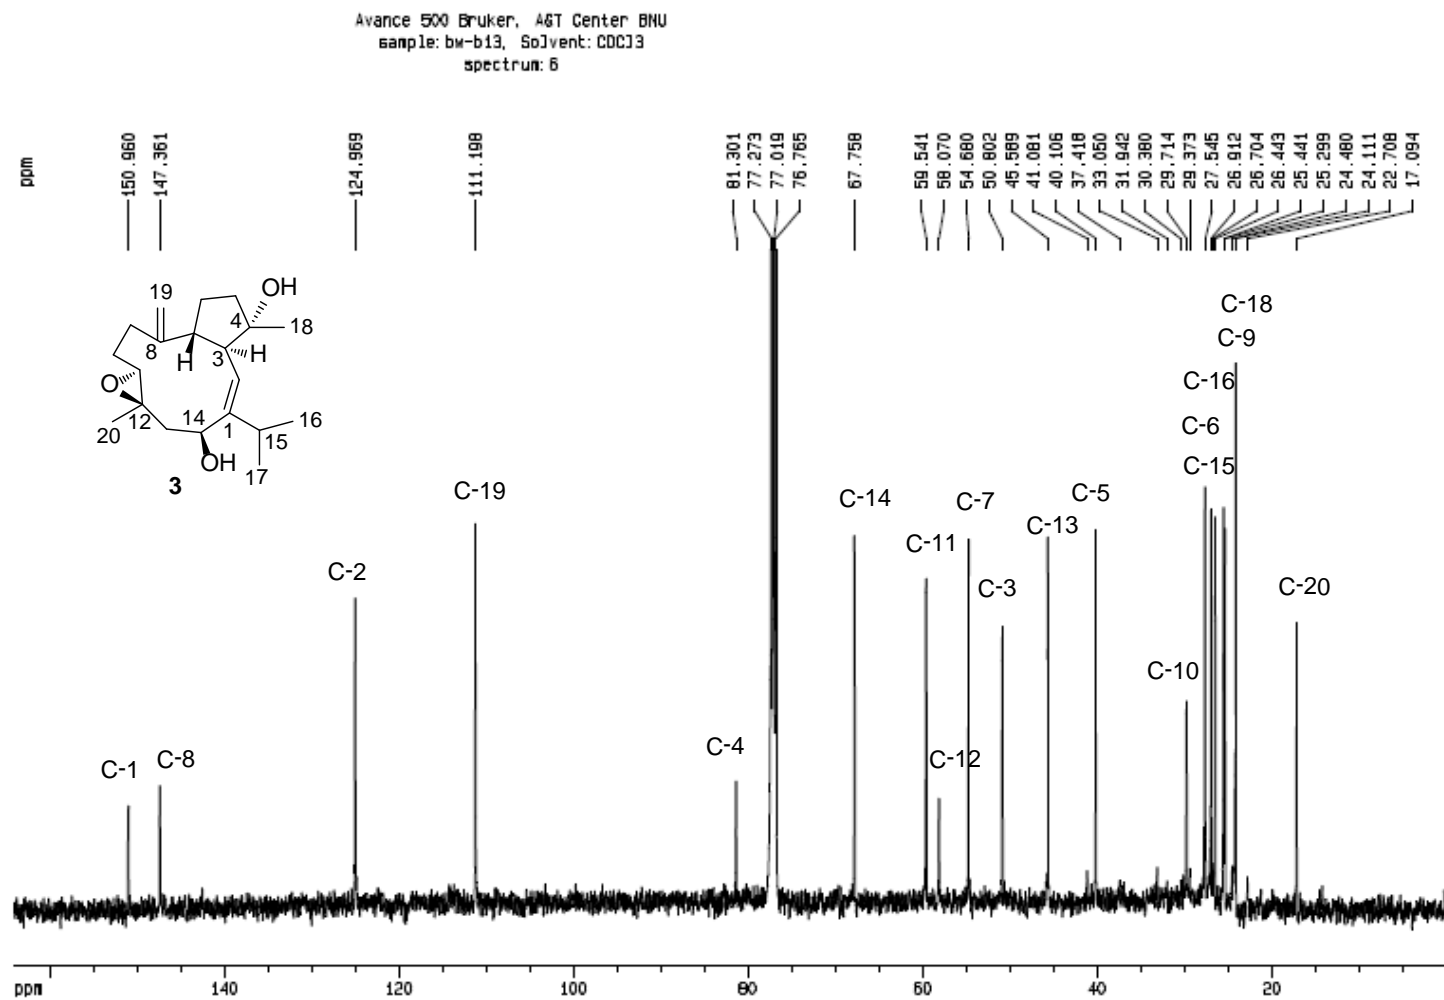

**Figure S19.** COSY spectrum of sarcopholide D (3).

Avance 500 Bruker, A&T Center BNU  
sample:bw-b13, Solvent:CDCl<sub>3</sub>  
spectrum:2

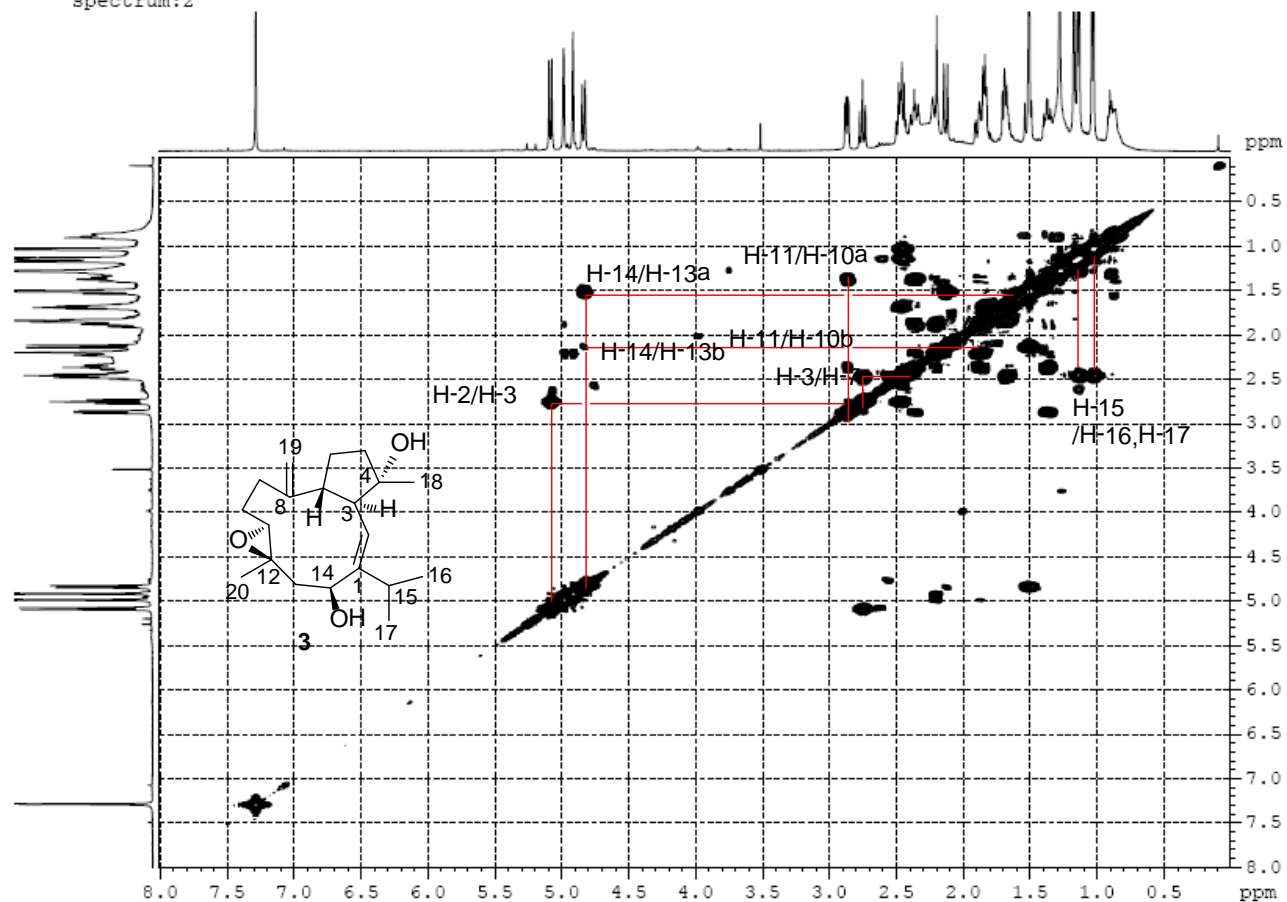



Figure S20. HMQC spectrum of sarcophylide D (3).

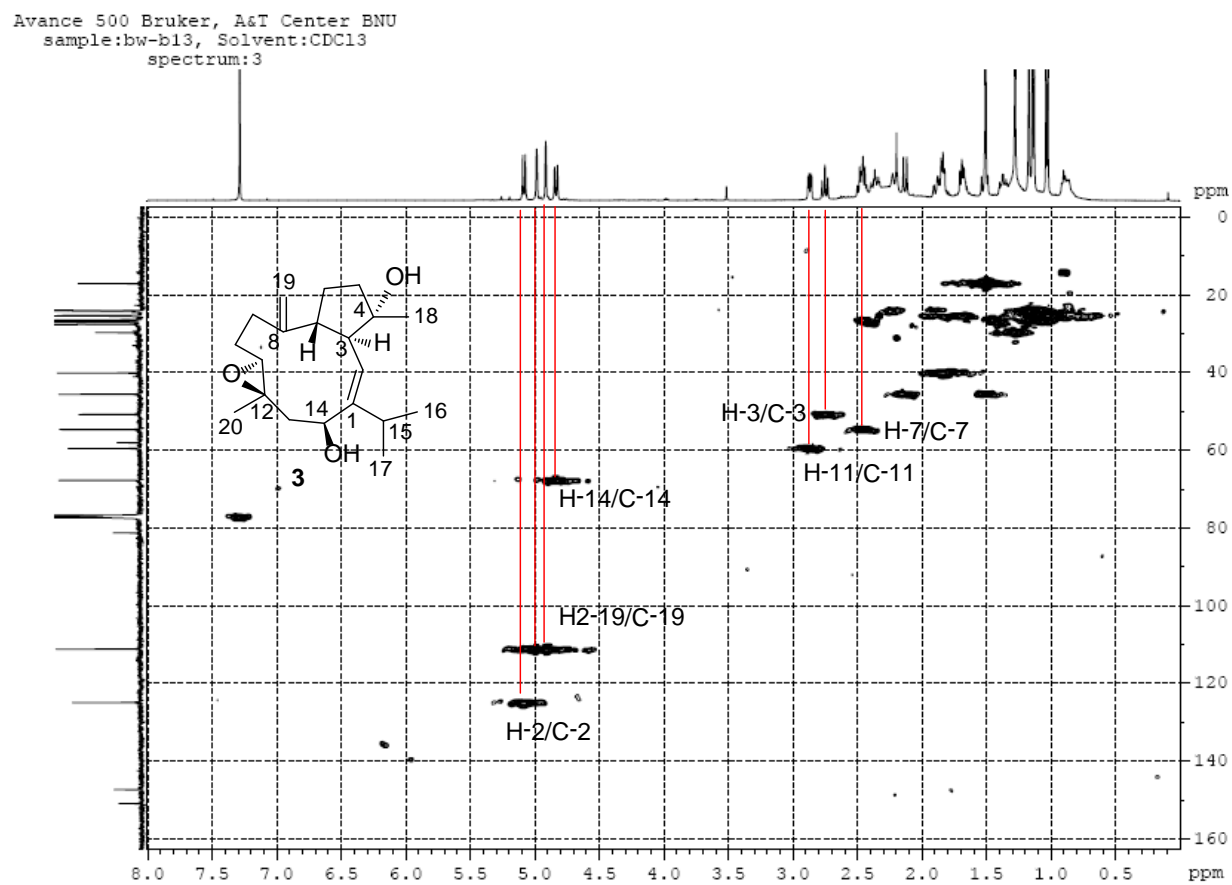

Figure S21. HMBC spectrum of sarcophyllide D (3).

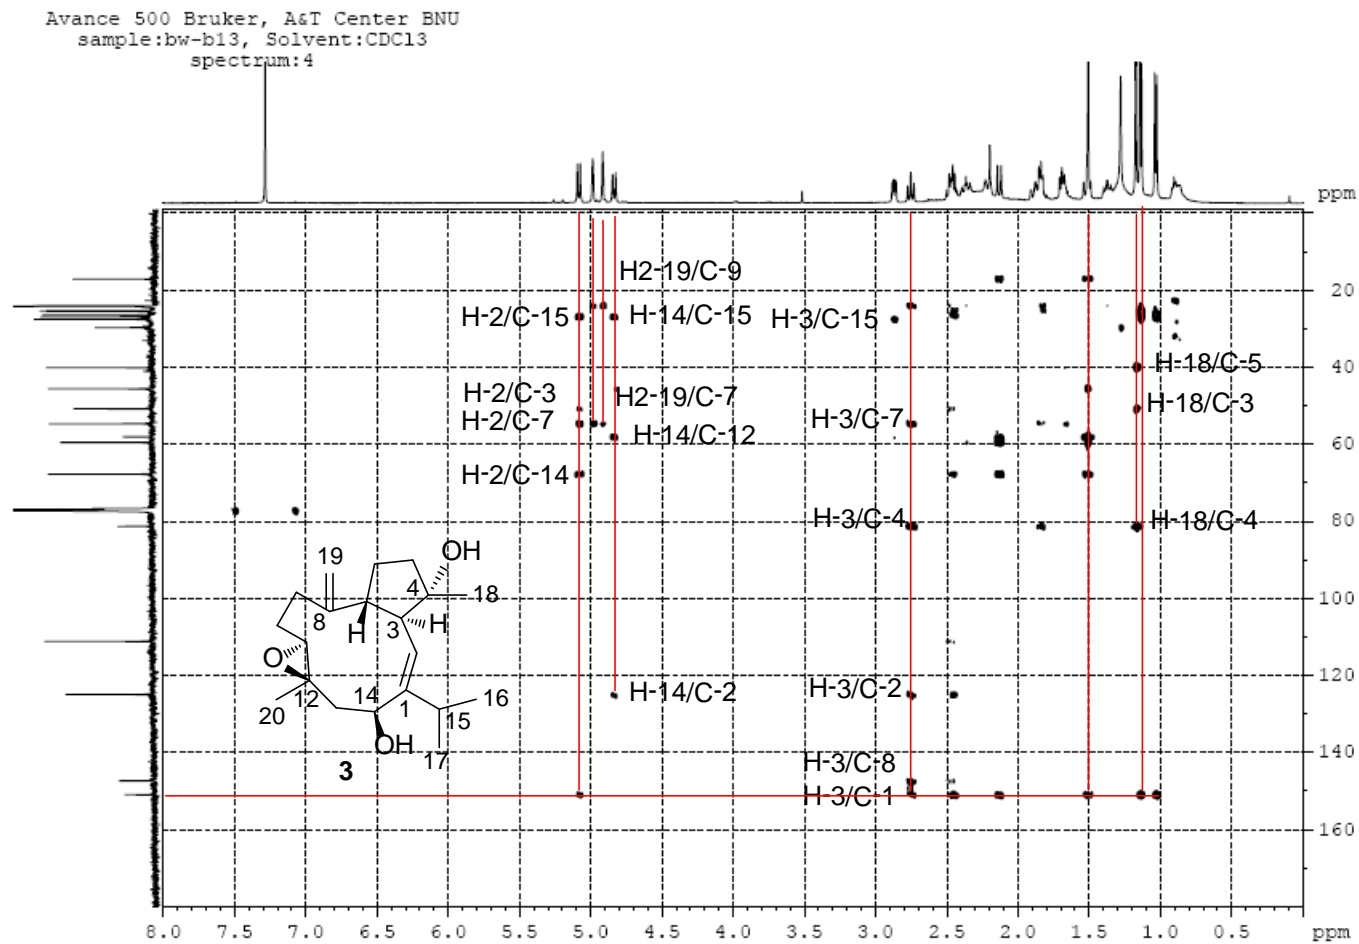

Figure S22. NOESY spectrum of sarcophylide D (3).

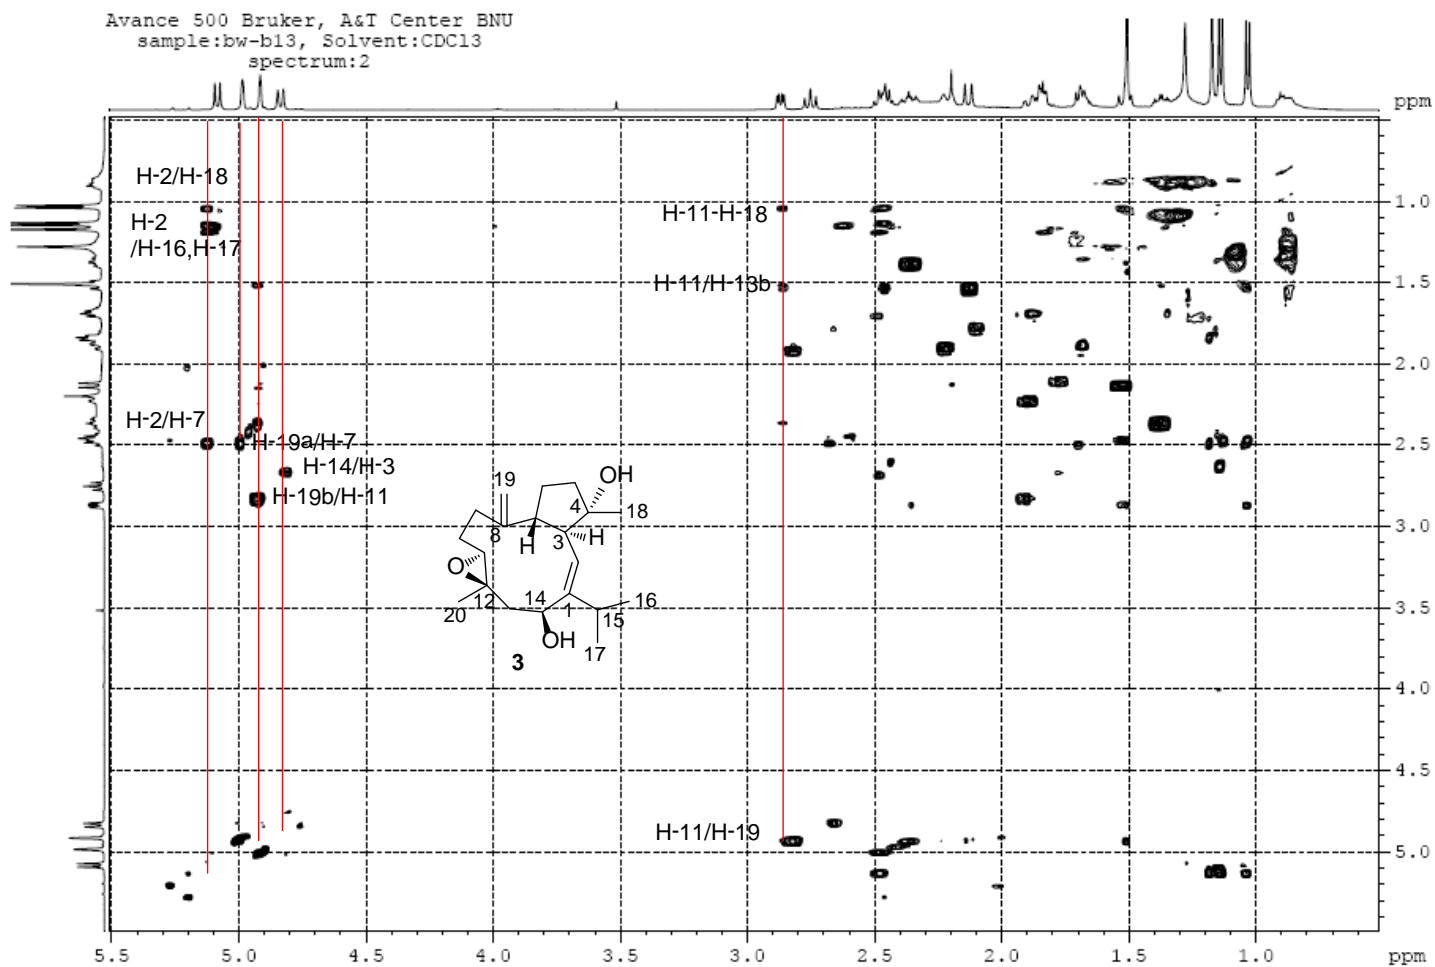

Figure S23. IR spectrum of sarcophyllide D (3).

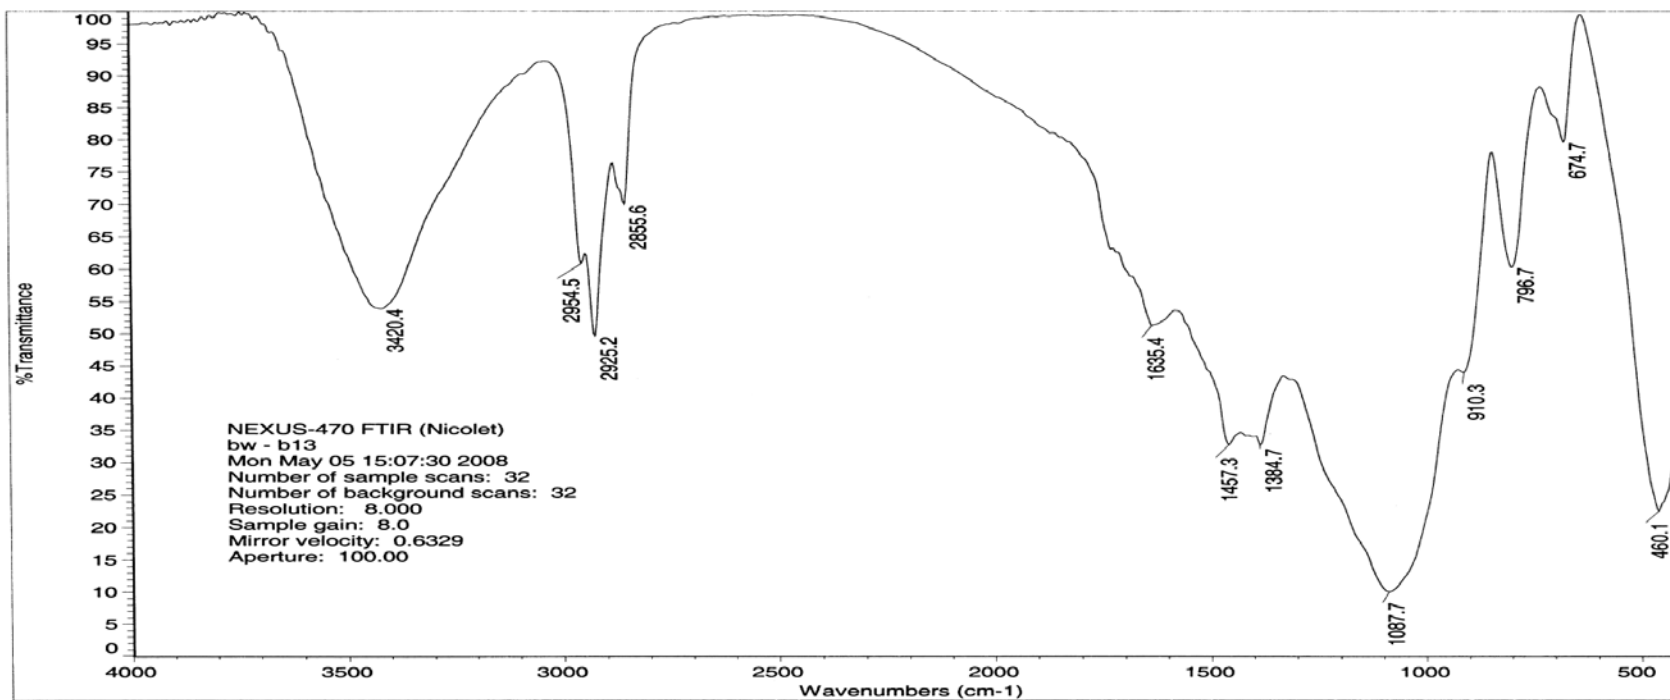

Figure S24. HRMS spectrum of sarcophyllide D (3).

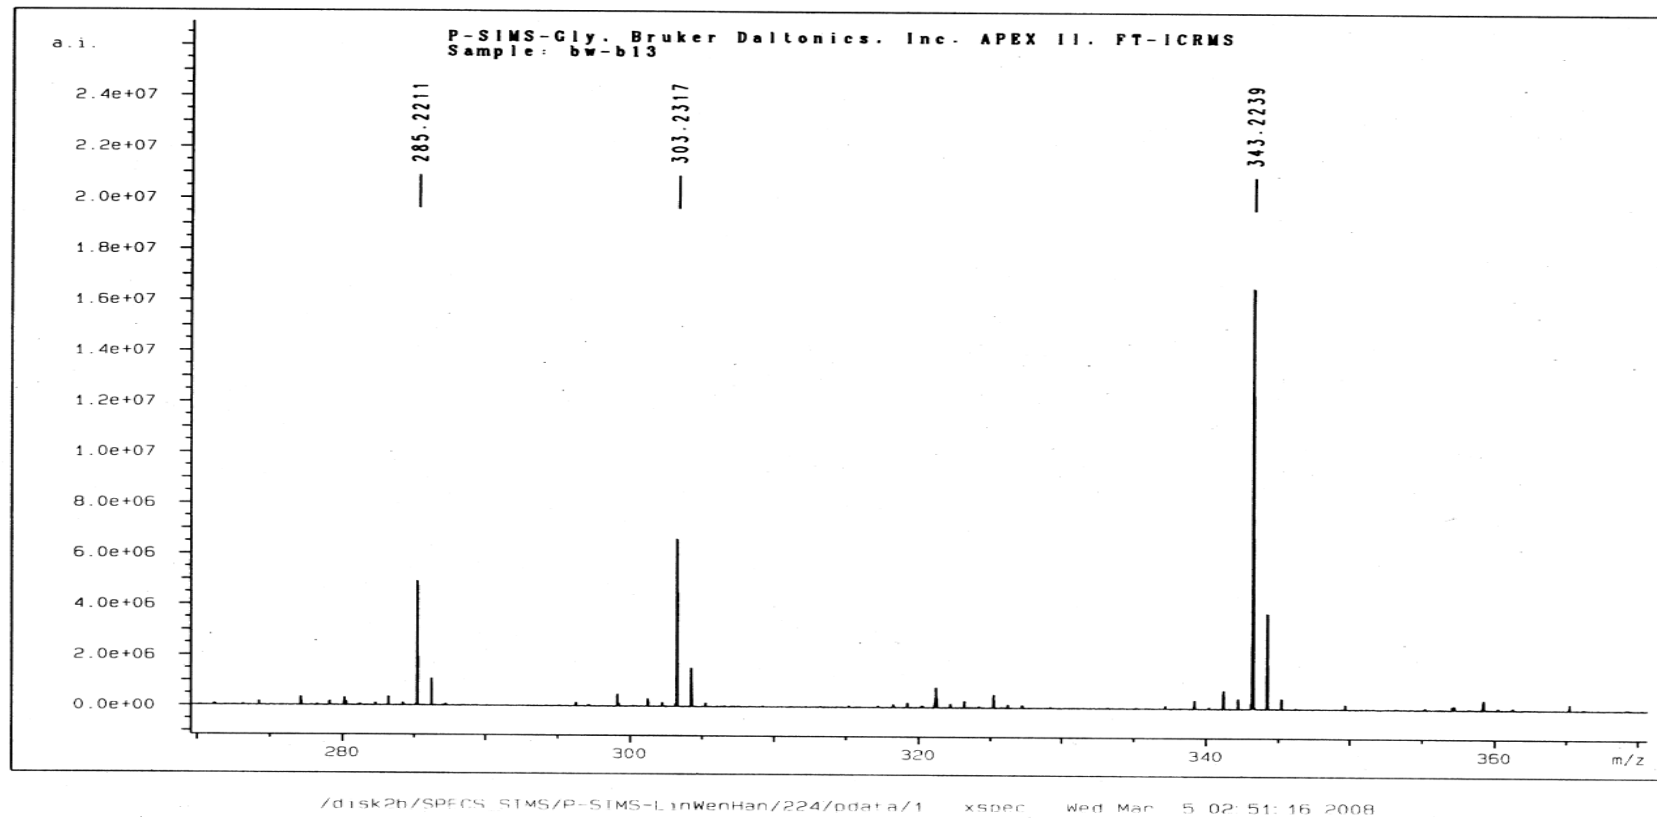

Figure S25.  $^1\text{H}$  NMR data of sarcophyllide E (4).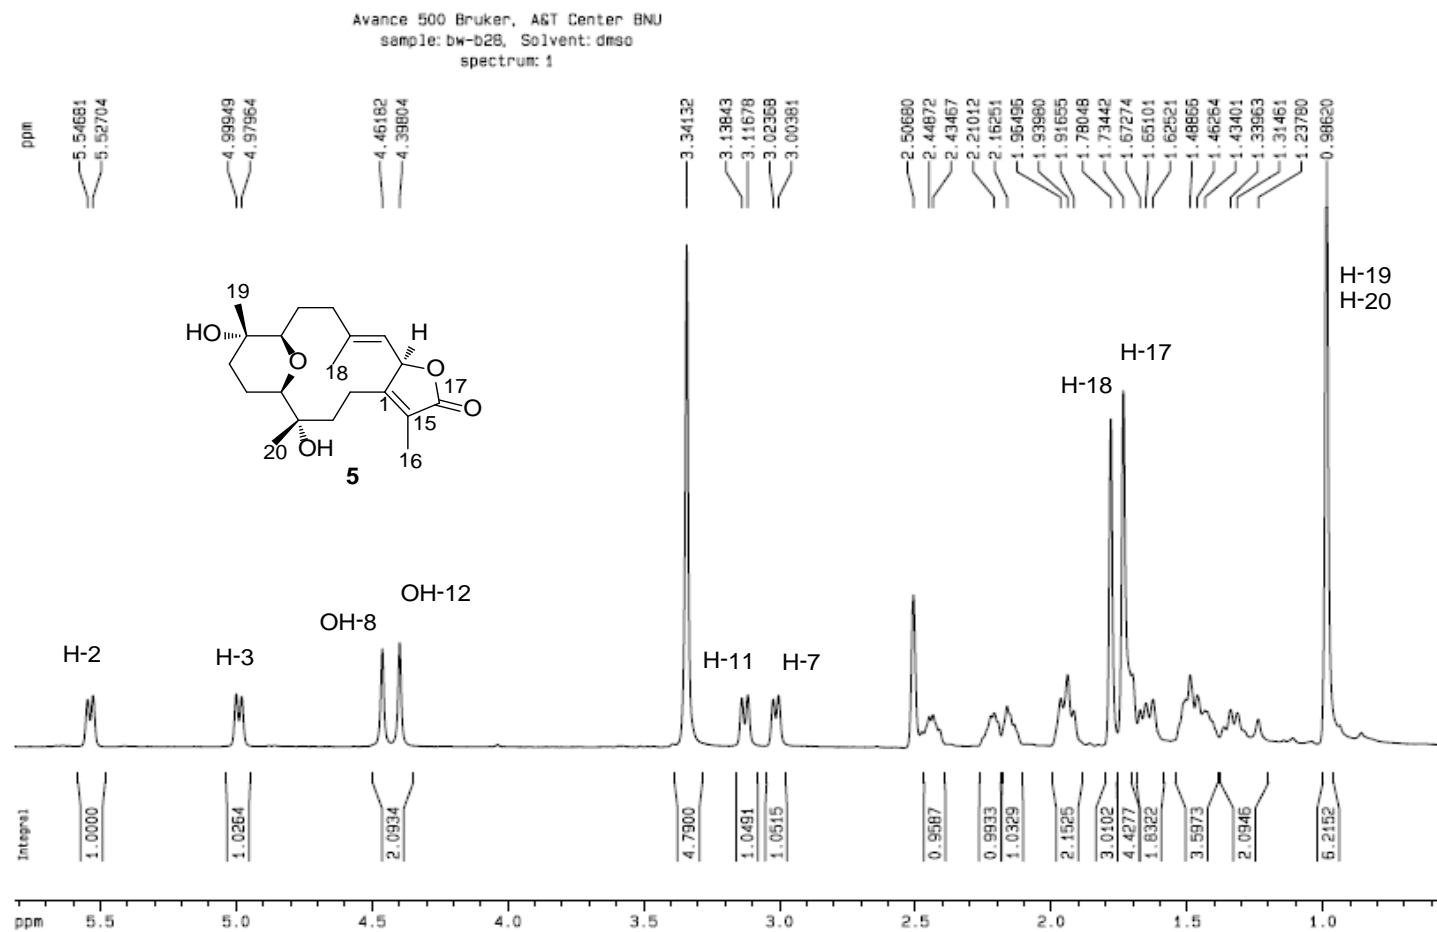

Figure S26.  $^{13}\text{C}$  NMR data of sarcophyllide E (4).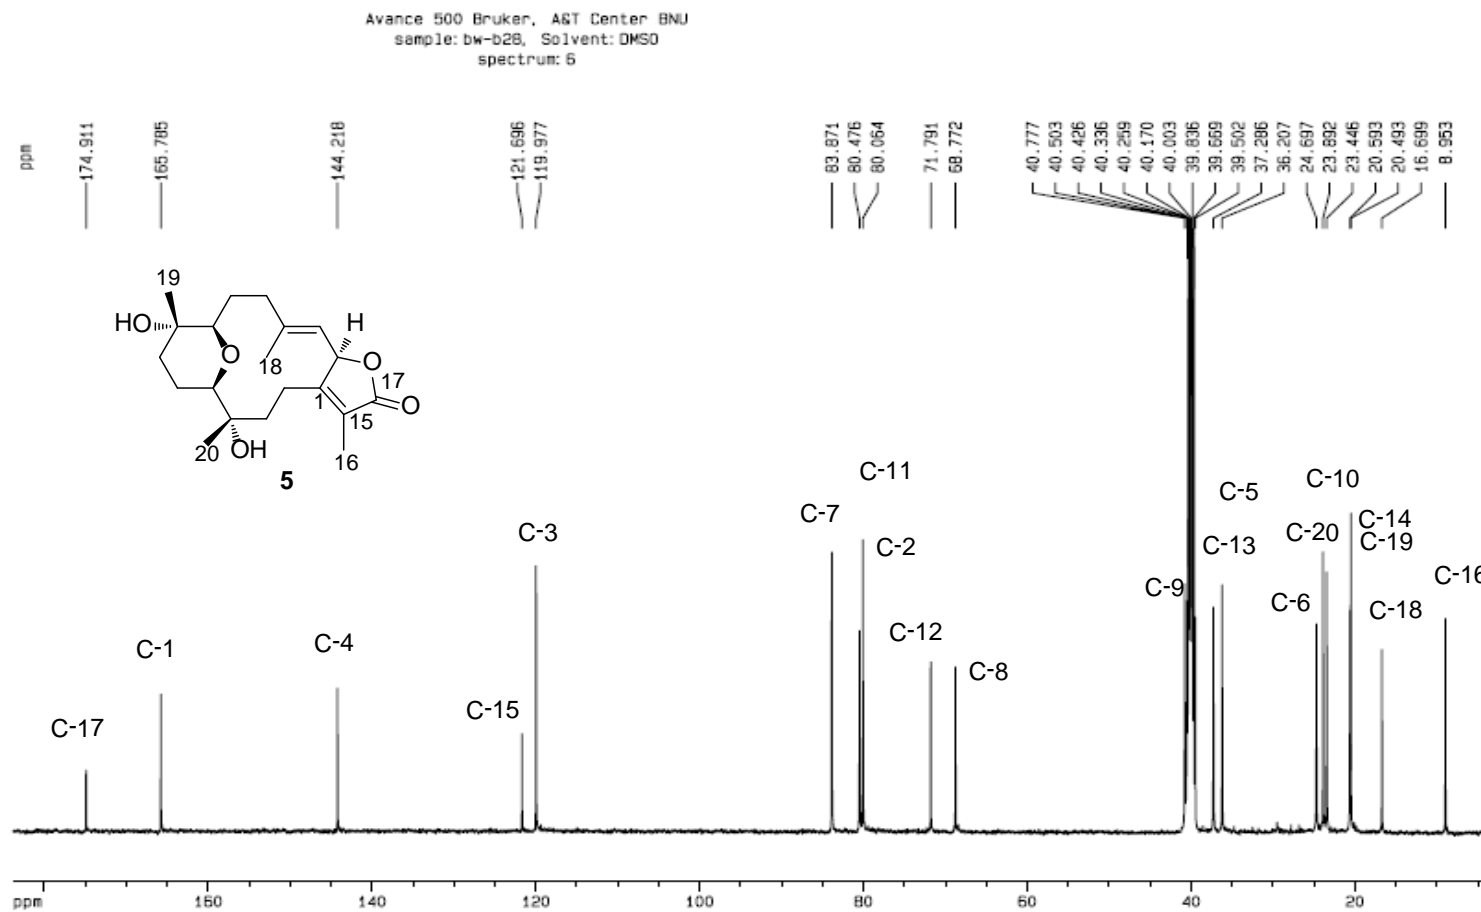

Figure S27. COSY spectrum of sarcophylide E (4).

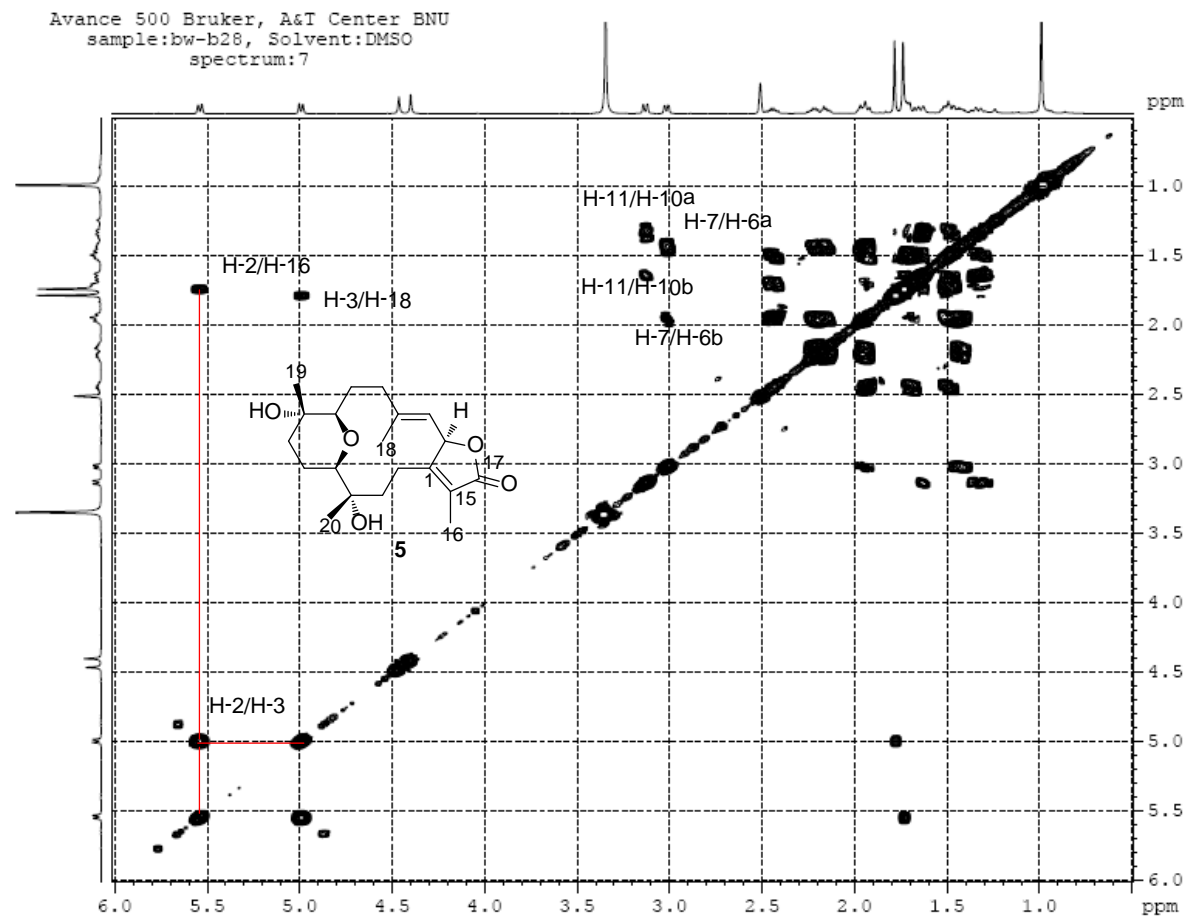



Figure S28. HMQC spectrum of sarcophylide E (4).

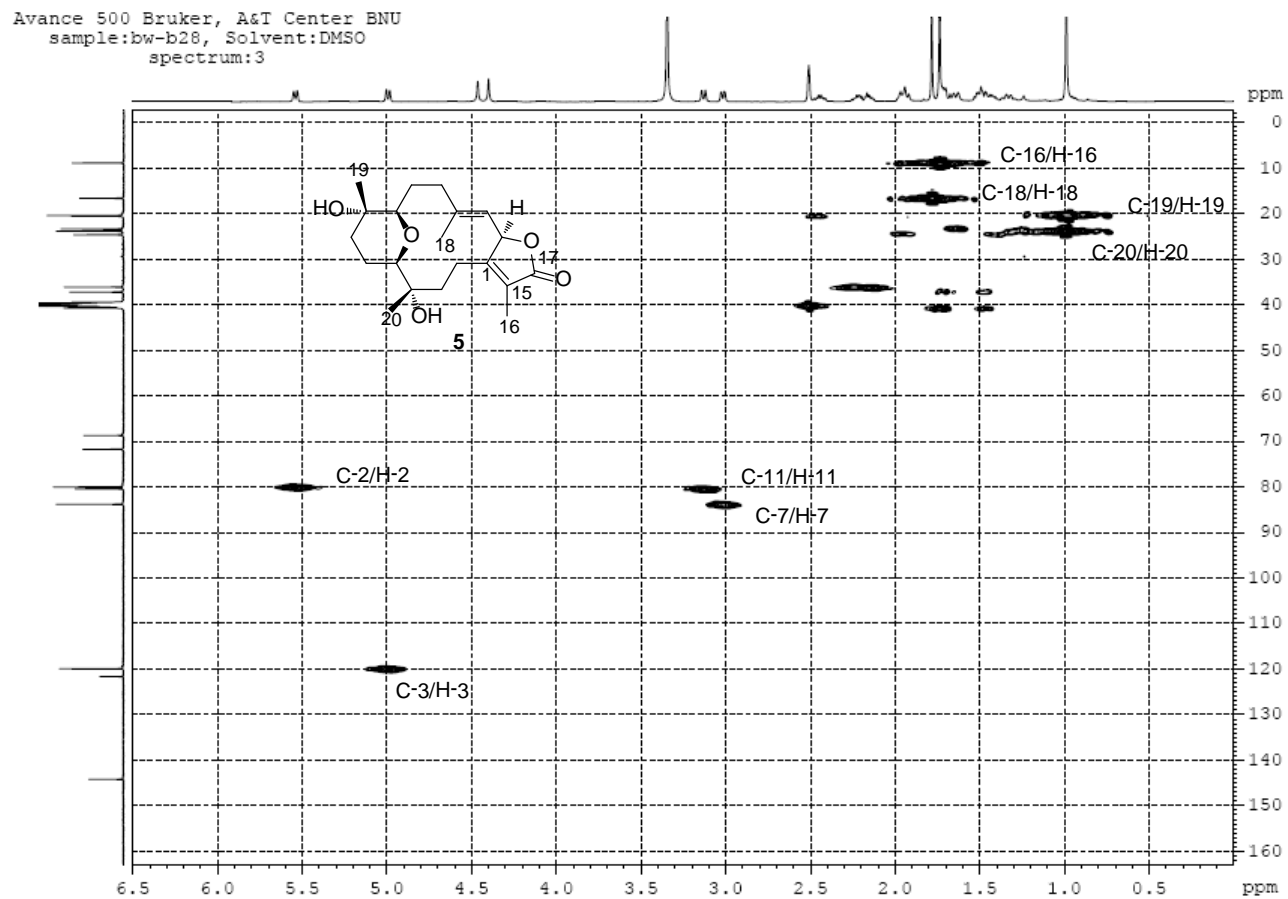

Figure S29. HMBC spectrum of sarcophyllide E (4).

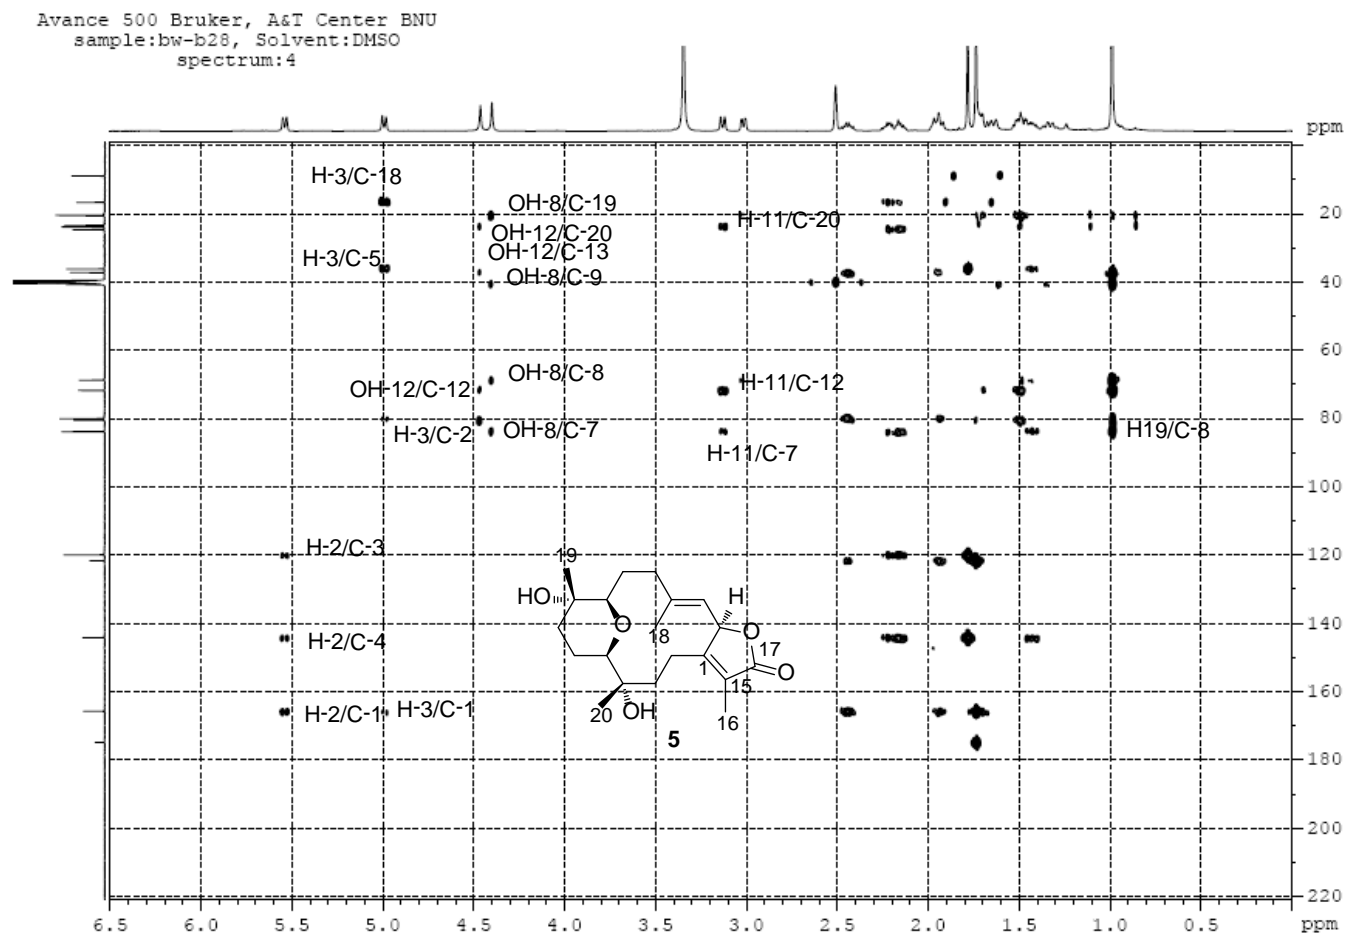

Figure S30. NOESY spectrum of sarcophylide E (4).

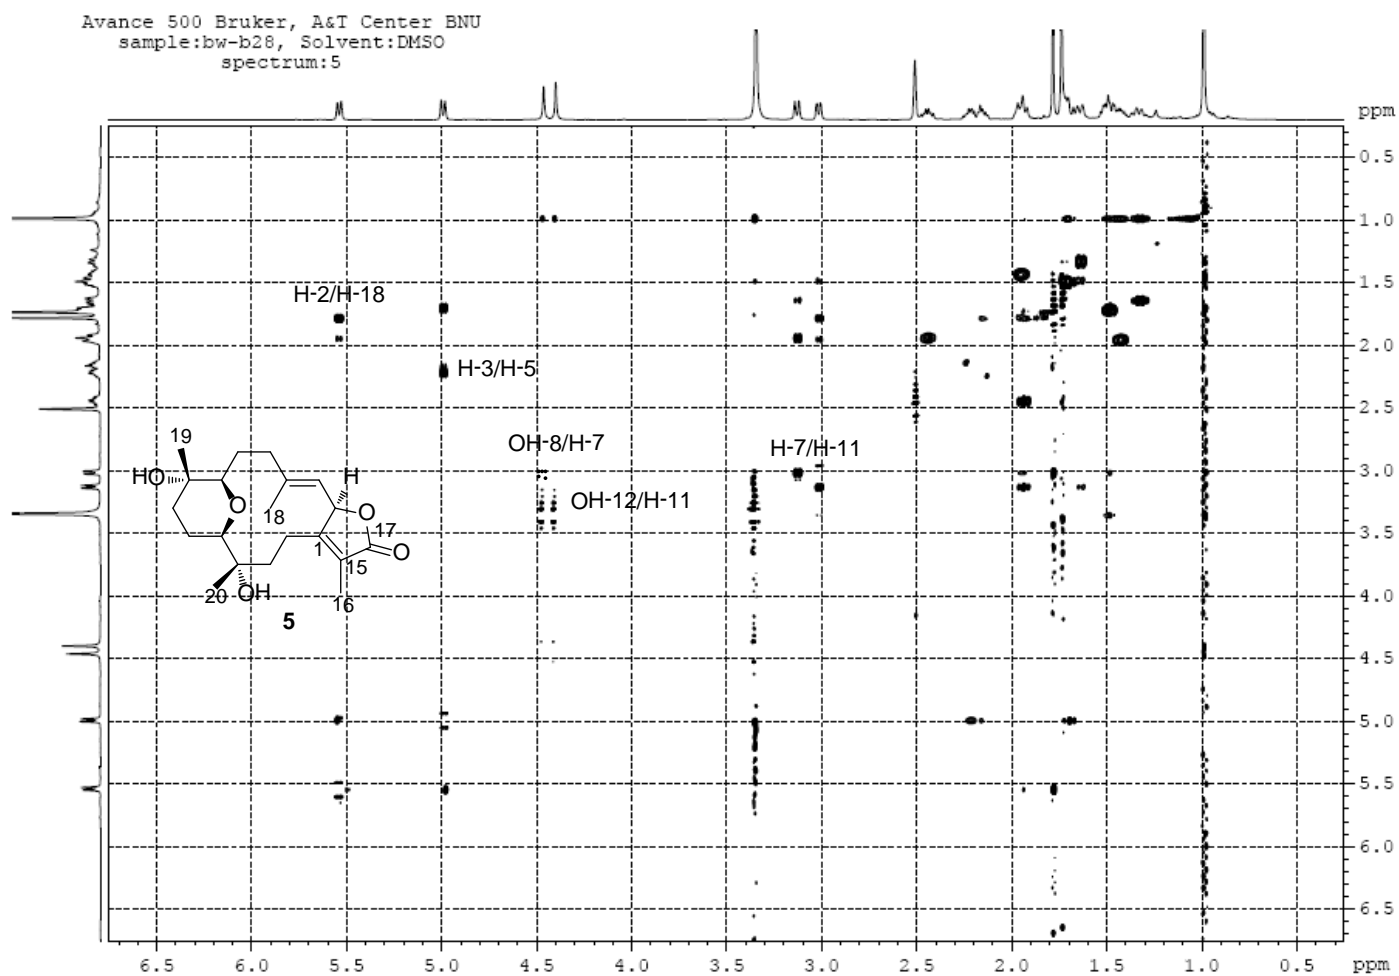

Figure S31. IR spectrum of sarcophyllide E (4).

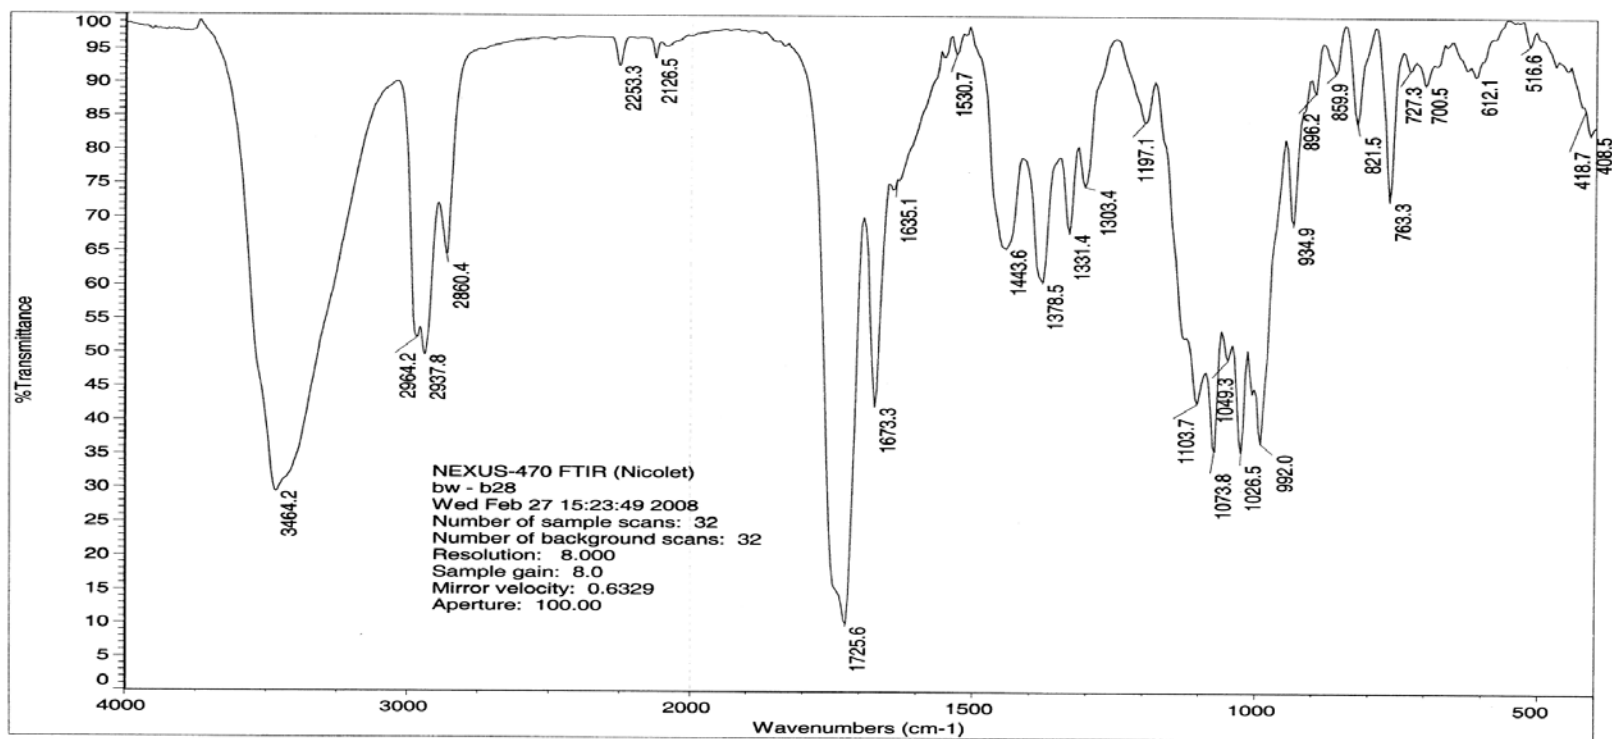

Figure S32. HRMS spectrum of sarcophylide E (4).

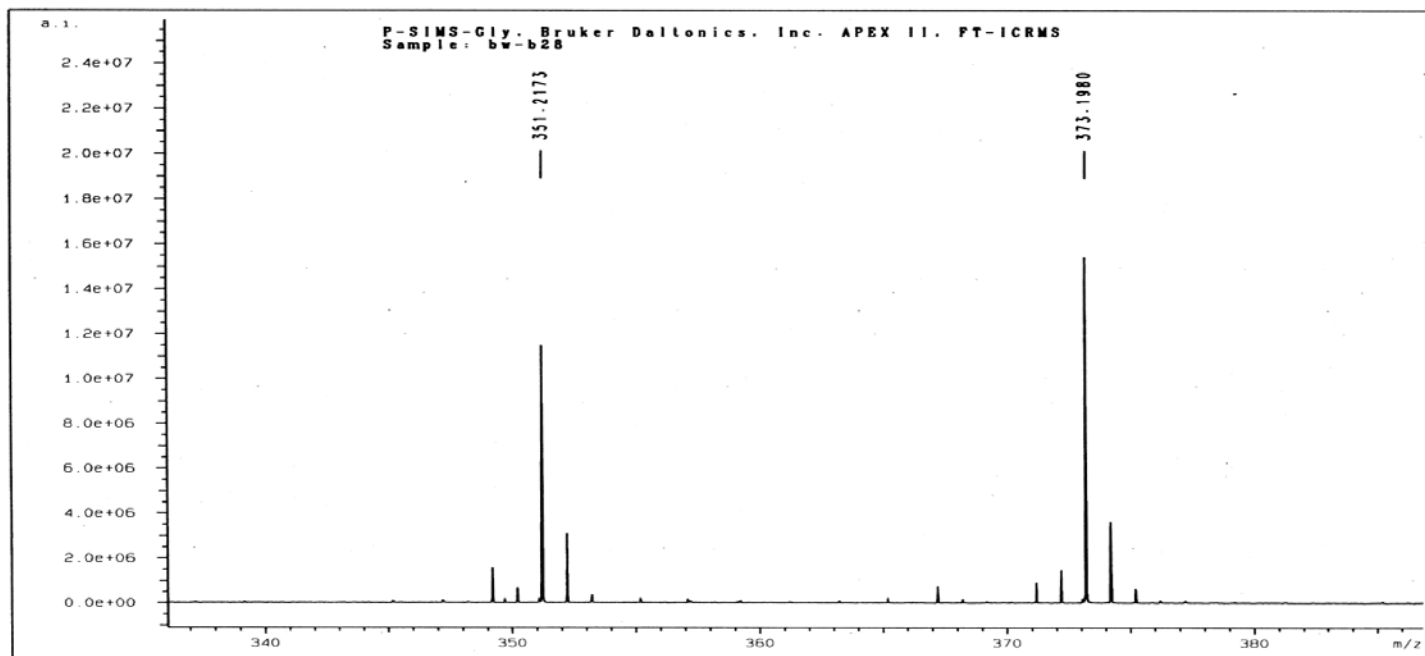

/diskPb/SPECS\_SIMS/P-SIMS-LinWenHan/222/pdata/1 xspec Wed Mar 5 02:52:15 2008

Figure S33. ORTEP depiction for X-ray crystal structure of 1.

## compound 1

Crystal Submitted by:  
 Crystal Submitted on:  
 Data Collected on:  
 Structure Solved by:

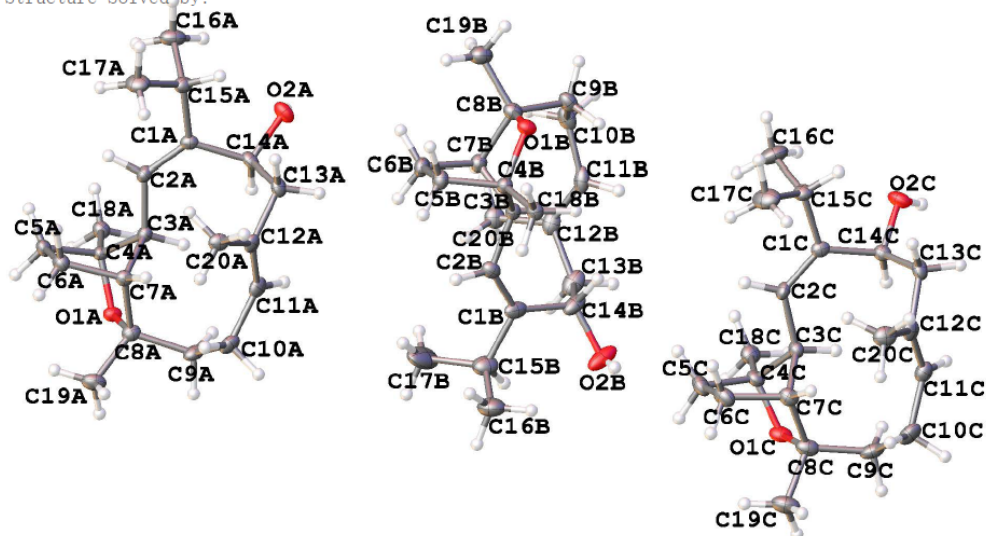

Table 1: Crystal data and structure refinement for compound 1

|                                                                          |                                                   |
|--------------------------------------------------------------------------|---------------------------------------------------|
| Identification code                                                      | exp_1415                                          |
| Empirical formula                                                        | C <sub>20</sub> H <sub>32</sub> O <sub>2</sub>    |
| Formula weight                                                           | 304.46                                            |
| Temperature/K                                                            | 97.3                                              |
| Crystal system                                                           | orthorhombic                                      |
| Space group                                                              | P2 <sub>1</sub> 2 <sub>1</sub> 2 <sub>1</sub>     |
| a/Å, b/Å, c/Å                                                            | 9.9686(2), 11.4498(3), 47.9528(18)                |
| α/°, β/°, γ/°                                                            | 90.00, 90.00, 90.00                               |
| Volume/Å <sup>3</sup>                                                    | 5473.2(3)                                         |
| Z                                                                        | 12                                                |
| ρ <sub>calc</sub> /mg mm <sup>-3</sup>                                   | 1.108                                             |
| μ/mm <sup>-1</sup>                                                       | 0.532                                             |
| F(000)                                                                   | 2016                                              |
| Crystal size/mm <sup>3</sup>                                             | 0.40 × 0.30 × 0.15                                |
| 2θ range for data collection                                             | 7.38 to 141°                                      |
| Index ranges                                                             | -10 ≤ h ≤ 12, -13 ≤ k ≤ 10, -58 ≤ l ≤ 57          |
| Reflections collected                                                    | 20784                                             |
| Independent reflections                                                  | 10157 [R(int) = 0.0455 (inf-0.9Å)]                |
| Data/restraints/parameters                                               | 10157/0/613                                       |
| Goodness-of-fit on F <sup>2</sup>                                        | 1.087                                             |
| Final R indexes [I > 2σ (I) i. e. F <sub>o</sub> > 4σ (F <sub>o</sub> )] | R <sub>1</sub> = 0.0526, wR <sub>2</sub> = 0.1243 |
| Final R indexes [all data]                                               | R <sub>1</sub> = 0.0592, wR <sub>2</sub> = 0.1279 |
| Largest diff. peak/hole/e Å <sup>-3</sup>                                | 0.216/-0.296                                      |
| Flack Parameters                                                         | 0.08(19)                                          |
| Completeness                                                             | 0.978                                             |

Table 2 Fractional Atomic Coordinates ( $\times 10^4$ ) and Equivalent Isotropic Displacement Parameters ( $\text{\AA}^2 \times 10^3$ ) for compound 1.  $U_{eq}$  is defined as 1/3 of the trace of the orthogonalised  $U_{ij}$  tensor.

| Atom | <i>x</i>      | <i>y</i>     | <i>z</i>    | $U(eq)$  |
|------|---------------|--------------|-------------|----------|
| O1A  | -15614.6 (15) | -7067.6 (13) | -391.5 (3)  | 16.5 (3) |
| O2A  | -12377.5 (18) | -2848.5 (14) | -952.1 (3)  | 22.3 (4) |
| C1A  | -12595 (2)    | -3787.4 (18) | -500.1 (5)  | 15.1 (4) |
| C2A  | -13343 (2)    | -4464.3 (19) | -334.0 (4)  | 15.4 (5) |
| C3A  | -14043 (2)    | -5576 (2)    | -414.4 (4)  | 14.6 (4) |
| C4A  | -15397 (2)    | -5894.8 (19) | -278.4 (4)  | 15.1 (5) |
| C5A  | -15057 (2)    | -6048 (2)    | 32.1 (5)    | 17.5 (5) |
| C6A  | -13613 (2)    | -6559 (2)    | 20.4 (5)    | 18.9 (5) |
| C7A  | -13369 (2)    | -6692.0 (19) | -296.0 (5)  | 16.0 (5) |
| C8A  | -14292 (2)    | -7634 (2)    | -419.9 (5)  | 18.4 (5) |
| C9A  | -14011 (2)    | -7874 (2)    | -734.1 (5)  | 21.2 (5) |
| C10A | -12514 (3)    | -7836 (2)    | -823.2 (5)  | 22.3 (5) |
| C11A | -12107 (2)    | -6622 (2)    | -907.8 (5)  | 19.9 (5) |
| C12A | -11213 (2)    | -5891 (2)    | -799.5 (5)  | 17.4 (5) |
| C13A | -11181 (2)    | -4632 (2)    | -898.3 (5)  | 18.8 (5) |
| C14A | -12457 (2)    | -3955 (2)    | -814.9 (5)  | 17.1 (5) |
| C15A | -11787 (2)    | -2759 (2)    | -384.0 (5)  | 19.2 (5) |
| C16A | -12654 (3)    | -1660 (2)    | -354.8 (6)  | 28.9 (6) |
| C17A | -11071 (3)    | -3032 (2)    | -109.0 (5)  | 29.0 (6) |
| C18A | -16622 (2)    | -5168 (2)    | -341.4 (5)  | 18.4 (5) |
| C19A | -14345 (3)    | -8786 (2)    | -263.1 (6)  | 25.8 (6) |
| C20A | -10234 (2)    | -6173 (2)    | -570.0 (5)  | 19.9 (5) |
| O1C  | -15154.0 (17) | -7162.9 (14) | -3850.3 (4) | 22.0 (4) |
| O2C  | -12620.7 (18) | -2299.2 (14) | -4159.1 (4) | 23.0 (4) |
| C1C  | -12511 (2)    | -3647.0 (19) | -3780.8 (5) | 16.5 (5) |
| C2C  | -13107 (2)    | -4546 (2)    | -3652.0 (4) | 17.3 (5) |
| C3C  | -13705 (2)    | -5604 (2)    | -3790.6 (5) | 16.5 (5) |
| C4C  | -15030 (3)    | -6112 (2)    | -3678.5 (5) | 19.9 (5) |
| C5C  | -14677 (3)    | -6536 (2)    | -3385.8 (5) | 25.6 (6) |
| C6C  | -13205 (3)    | -6949 (2)    | -3421.1 (5) | 26.7 (6) |
| C7C  | -12941 (2)    | -6760 (2)    | -3735.4 (5) | 20.6 (5) |
| C8C  | -13794 (3)    | -7589 (2)    | -3913.3 (6) | 23.9 (5) |
| C9C  | -13564 (3)    | -7469 (2)    | -4231.8 (6) | 25.8 (6) |
| C10C | -12103 (3)    | -7242 (2)    | -4327.3 (6) | 28.5 (6) |
| C11C | -11827 (2)    | -5945 (2)    | -4344.7 (5) | 21.9 (5) |
| C12C | -10987 (2)    | -5282 (2)    | -4202.1 (5) | 20.7 (5) |
| C13C | -11128 (2)    | -3961 (2)    | -4220.5 (5) | 20.7 (5) |
| C14C | -12453 (2)    | -3509.5 (19) | -4095.5 (5) | 16.8 (5) |
| C15C | -11841 (3)    | -2659 (2)    | -3618.0 (5) | 21.5 (5) |
| C16C | -12894 (3)    | -1816 (2)    | -3506.4 (7) | 37.8 (7) |
| C17C | -10934 (3)    | -3092 (2)    | -3382.1 (6) | 36.1 (7) |
| C18C | -16287 (2)    | -5405 (2)    | -3713.8 (5) | 23.3 (5) |
| C19C | -13712 (3)    | -8879 (2)    | -3832.9 (7) | 34.4 (7) |
| C20C | -9902 (3)     | -5711 (2)    | -4009.0 (5) | 26.0 (6) |
| O1B  | -9612.1 (16)  | -2767.7 (14) | -2036.5 (3) | 18.5 (3) |
| O2B  | -12659.4 (19) | -6705.9 (19) | -2743.4 (4) | 37.2 (5) |
| C1B  | -12421 (2)    | -6070 (2)    | -2257.6 (5) | 22.6 (5) |
| C2B  | -11750 (2)    | -5455 (2)    | -2067.9 (5) | 19.1 (5) |
| C3B  | -11126 (2)    | -4270 (2)    | -2107.2 (4) | 15.7 (5) |
| C4B  | -9771 (2)     | -4009 (2)    | -1967.6 (5) | 16.5 (5) |
| C5B  | -10074 (2)    | -4069 (2)    | -1653.2 (5) | 20.3 (5) |
| C6B  | -11545 (2)    | -3613 (2)    | -1638.6 (5) | 20.0 (5) |
| C7B  | -11829 (2)    | -3273 (2)    | -1944.3 (5) | 17.6 (5) |
| C8B  | -10952 (2)    | -2236 (2)    | -2035.0 (5) | 19.8 (5) |
| C9B  | -11277 (3)    | -1776 (2)    | -2332.0 (5) | 23.0 (5) |
| C10B | -12766 (3)    | -1851 (2)    | -2422.9 (5) | 25.4 (6) |
| C11B | -13076 (2)    | -3008 (2)    | -2553.8 (5) | 24.5 (6) |

|      |            |           |             |           |
|------|------------|-----------|-------------|-----------|
| C12B | -13922 (2) | -3846 (2) | -2475.3 (5) | 22.7 (5)  |
| C13B | -13859 (3) | -5017 (3) | -2622.2 (6) | 29.9 (6)  |
| C14B | -12571 (3) | -5717 (2) | -2562.7 (5) | 25.9 (6)  |
| C15B | -13121 (3) | -7213 (2) | -2178.5 (6) | 33.1 (6)  |
| C16B | -12142 (3) | -8235 (2) | -2177.1 (7) | 37.5 (7)  |
| C17B | -13848 (4) | -7148 (3) | -1897.3 (8) | 62.3 (12) |
| C18B | -8547 (2)  | -4658 (2) | -2065.2 (5) | 18.2 (5)  |
| C19B | -10909 (3) | -1200 (2) | -1834.1 (6) | 28.7 (6)  |
| C20B | -14931 (2) | -3763 (2) | -2242.7 (5) | 23.0 (5)  |

Table 3 Anisotropic Displacement Parameters ( $\text{\AA}^2 \times 10^3$ ) for compound **1**. The Anisotropic displacement factor exponent takes the form:  $-2 \pi^2 [h^2 a^*^2 U_{11} + \dots + 2hka \times b \times U_{12}]$

| Atom | $U_{11}$  | $U_{22}$  | $U_{33}$  | $U_{23}$   | $U_{13}$   | $U_{12}$  |
|------|-----------|-----------|-----------|------------|------------|-----------|
| O1A  | 13.3 (8)  | 14.6 (8)  | 21.5 (8)  | -1.7 (7)   | 0.2 (6)    | -0.5 (7)  |
| O2A  | 18.5 (9)  | 22.8 (8)  | 25.6 (9)  | 10.8 (7)   | -2.3 (7)   | -0.6 (8)  |
| C1A  | 11.8 (11) | 13.2 (10) | 20.2 (11) | -0.7 (8)   | -2.2 (9)   | 1.5 (9)   |
| C2A  | 14.4 (11) | 16.7 (11) | 15.1 (10) | -2.4 (9)   | 0.6 (8)    | 1.5 (9)   |
| C3A  | 13.4 (11) | 16.1 (11) | 14.4 (10) | -1.1 (9)   | 0.1 (8)    | 0.9 (9)   |
| C4A  | 18.2 (12) | 12.0 (11) | 15.1 (10) | 0.1 (9)    | 0.7 (9)    | -1.2 (9)  |
| C5A  | 17.3 (12) | 17.9 (11) | 17.3 (11) | 2.9 (9)    | 3.0 (9)    | -1.8 (10) |
| C6A  | 18.7 (12) | 19.5 (11) | 18.6 (11) | 1.5 (9)    | -0.8 (9)   | -1.3 (10) |
| C7A  | 13.3 (11) | 15.7 (11) | 18.9 (11) | 0.0 (9)    | -0.5 (9)   | 0.9 (9)   |
| C8A  | 14.4 (11) | 19.0 (12) | 21.8 (11) | -2.3 (10)  | -1.1 (9)   | -0.4 (10) |
| C9A  | 17.8 (13) | 19.9 (12) | 25.8 (12) | -8.8 (10)  | 0.6 (10)   | -3.8 (10) |
| C10A | 18.6 (13) | 24.3 (12) | 24.1 (12) | -9.4 (10)  | 1.7 (10)   | 2.7 (11)  |
| C11A | 13.2 (12) | 27.2 (12) | 19.3 (11) | -4.7 (10)  | 3.0 (9)    | 5.1 (10)  |
| C12A | 13.9 (11) | 21.5 (12) | 16.6 (10) | -3.6 (9)   | 4.8 (9)    | 3.4 (10)  |
| C13A | 14.9 (12) | 24.3 (12) | 17.3 (10) | 3.0 (9)    | 2.6 (9)    | -1.2 (10) |
| C14A | 13.6 (11) | 18.1 (11) | 19.5 (11) | 5.2 (9)    | -0.5 (9)   | -4 (1)    |
| C15A | 16.3 (12) | 18.1 (11) | 23.3 (11) | -3.3 (10)  | 2.2 (10)   | -3 (1)    |
| C16A | 24.4 (14) | 17.4 (12) | 45.0 (16) | -4.1 (11)  | -0.1 (12)  | -1.7 (11) |
| C17A | 28.8 (15) | 25.0 (14) | 33.2 (14) | -3.6 (11)  | -9.0 (11)  | -8.5 (12) |
| C18A | 16.2 (12) | 19.2 (11) | 20.0 (11) | 1.5 (9)    | 0.0 (9)    | -0.5 (10) |
| C19A | 23.1 (14) | 16.4 (12) | 38.1 (14) | 0.1 (11)   | -1.4 (11)  | 0.1 (10)  |
| C20A | 14.1 (12) | 18.4 (12) | 27.4 (12) | -2.1 (10)  | -0.2 (10)  | 2.5 (10)  |
| O1C  | 17.5 (9)  | 17.0 (8)  | 31.4 (9)  | 0.4 (7)    | -3.8 (7)   | -3.8 (7)  |
| O2C  | 23.9 (10) | 15.9 (8)  | 29.3 (9)  | 6.9 (7)    | -7.7 (7)   | -3.6 (7)  |
| C1C  | 11.4 (11) | 16.8 (11) | 21.4 (11) | -2.3 (9)   | -1.4 (9)   | 1.4 (10)  |
| C2C  | 17.3 (12) | 22.2 (12) | 12.4 (10) | -2.7 (9)   | 0.0 (9)    | -1 (1)    |
| C3C  | 16.8 (12) | 17.6 (11) | 15 (1)    | 2.0 (9)    | -0.6 (9)   | -2.5 (10) |
| C4C  | 20.6 (13) | 17.5 (11) | 21.6 (11) | 2.7 (10)   | -0.1 (10)  | -5.1 (10) |
| C5C  | 25.5 (14) | 27.9 (13) | 23.4 (12) | 7.2 (11)   | 0.6 (10)   | -9.5 (11) |
| C6C  | 28.8 (15) | 24.4 (13) | 26.9 (13) | 8.3 (10)   | -6.4 (11)  | -4.1 (11) |
| C7C  | 17.2 (12) | 20.1 (11) | 24.6 (12) | 2.9 (10)   | -2.8 (10)  | -0.4 (10) |
| C8C  | 18.4 (13) | 17.8 (12) | 35.6 (14) | 0.1 (10)   | -1.3 (11)  | -1.1 (10) |
| C9C  | 26.9 (14) | 18.1 (12) | 32.5 (13) | -9.8 (10)  | -5.2 (11)  | 1.9 (11)  |
| C10C | 27.8 (15) | 28.9 (14) | 28.8 (13) | -11.7 (11) | 1.0 (11)   | 7.4 (12)  |
| C11C | 18.7 (13) | 26.8 (13) | 20.1 (11) | -3.4 (10)  | 1.1 (10)   | 3.7 (11)  |
| C12C | 16.1 (12) | 26.4 (13) | 19.7 (11) | -1.9 (10)  | 5.8 (9)    | 3.6 (11)  |
| C13C | 17.1 (12) | 27.7 (13) | 17.2 (11) | 3.4 (10)   | 2.4 (9)    | -4.0 (11) |
| C14C | 15.0 (11) | 16.2 (11) | 19.3 (11) | 1.2 (9)    | -2.7 (9)   | -1 (1)    |
| C15C | 20.8 (13) | 19.7 (12) | 24.0 (12) | -3.3 (10)  | -2.2 (10)  | -5.4 (10) |
| C16C | 38.0 (18) | 26.7 (14) | 48.7 (17) | -17.9 (13) | -3.7 (14)  | 1.1 (13)  |
| C17C | 40.9 (18) | 30.8 (15) | 36.7 (15) | -4.5 (12)  | -16.4 (13) | -6.5 (13) |
| C18C | 19.0 (13) | 24.8 (13) | 26.3 (12) | -0.5 (10)  | 3.1 (10)   | -3.6 (11) |
| C19C | 32.3 (16) | 18.9 (13) | 52.0 (18) | 2.9 (12)   | -5.9 (14)  | -1.8 (12) |
| C20C | 17.4 (13) | 25.6 (13) | 35.1 (14) | -2.8 (11)  | -1.4 (10)  | 2.1 (11)  |
| O1B  | 15.8 (8)  | 15.9 (8)  | 23.7 (8)  | 1.5 (7)    | 0.4 (7)    | -1.2 (7)  |
| O2B  | 16.3 (9)  | 49.1 (12) | 46.3 (12) | -30.5 (10) | 0.8 (9)    | -2.7 (9)  |
| C1B  | 12.0 (12) | 20.8 (12) | 34.8 (13) | -8 (1)     | 5 (1)      | -0.8 (10) |



|      |           |           |           |            |           |            |
|------|-----------|-----------|-----------|------------|-----------|------------|
| C2B  | 15.5 (12) | 17.0 (11) | 24.9 (12) | 1.7 (9)    | 2.2 (10)  | 2 (1)      |
| C3B  | 14.9 (11) | 17.5 (11) | 14.8 (10) | 0.5 (9)    | 0.3 (9)   | 2.2 (10)   |
| C4B  | 17.7 (12) | 15.3 (11) | 16.5 (11) | -0.3 (9)   | -0.1 (9)  | -0.2 (9)   |
| C5B  | 19.4 (13) | 25.1 (12) | 16.4 (11) | 0.9 (10)   | -1.5 (9)  | -0.8 (10)  |
| C6B  | 21.3 (13) | 22.9 (12) | 15.8 (11) | -2.2 (9)   | 2.6 (9)   | -2.1 (10)  |
| C7B  | 15.3 (12) | 19.8 (11) | 17.7 (11) | -0.4 (9)   | 0.1 (9)   | -0.9 (10)  |
| C8B  | 16.4 (12) | 18.8 (12) | 24.1 (12) | 1.6 (10)   | -0.2 (9)  | -1.6 (10)  |
| C9B  | 21.4 (13) | 20.8 (12) | 26.7 (12) | 7.2 (10)   | 2.7 (10)  | 1.8 (11)   |
| C10B | 22.1 (13) | 29.3 (14) | 24.8 (12) | 11.1 (10)  | 0.2 (10)  | 4.0 (11)   |
| C11B | 17.2 (13) | 41.5 (16) | 14.7 (11) | 3.8 (10)   | -0.5 (9)  | 7.1 (12)   |
| C12B | 12.6 (12) | 36.5 (15) | 19.1 (11) | -0.9 (10)  | -4.3 (9)  | 5.3 (11)   |
| C13B | 16.6 (14) | 45.1 (17) | 28.1 (13) | -10.2 (12) | -4.6 (10) | -0.6 (12)  |
| C14B | 15.5 (12) | 33.1 (14) | 29.3 (13) | -15.2 (11) | 1 (1)     | -3.7 (12)  |
| C15B | 26.3 (15) | 28.2 (14) | 44.9 (16) | -6.1 (13)  | 2.1 (12)  | -6.1 (13)  |
| C16B | 40.5 (18) | 23.8 (14) | 48.2 (18) | -3.6 (12)  | -5.6 (14) | -5.7 (13)  |
| C17B | 61 (3)    | 36.9 (18) | 89 (3)    | -8.5 (19)  | 44 (2)    | -22.5 (18) |
| C18B | 15.6 (12) | 20.9 (12) | 18.3 (11) | 2.0 (9)    | -0.5 (9)  | 2.1 (10)   |
| C19B | 29.0 (15) | 21.7 (13) | 35.3 (14) | -2.9 (11)  | 2.4 (12)  | -1.5 (12)  |
| C20B | 13.6 (12) | 29.0 (14) | 26.4 (12) | 0.6 (11)   | -0.7 (10) | 2.1 (11)   |

Table 4 Bond Lengths for compound 1.

| Atom | Atom | Length/Å  | Atom | Atom | Length/Å  |
|------|------|-----------|------|------|-----------|
| O1A  | C4A  | 1.464 (3) | C7C  | C8C  | 1.534 (3) |
| O1A  | C8A  | 1.476 (3) | C8C  | C9C  | 1.551 (4) |
| O2A  | C14A | 1.429 (3) | C8C  | C19C | 1.528 (3) |
| C1A  | C2A  | 1.338 (3) | C10C | C9C  | 1.548 (4) |
| C1A  | C14A | 1.527 (3) | C10C | C11C | 1.512 (4) |
| C1A  | C15A | 1.531 (3) | C12C | C11C | 1.322 (4) |
| C2A  | C3A  | 1.503 (3) | C12C | C13C | 1.522 (3) |
| C3A  | C7A  | 1.551 (3) | C12C | C20C | 1.506 (3) |
| C4A  | C3A  | 1.542 (3) | C14C | C13C | 1.540 (3) |
| C4A  | C18A | 1.508 (3) | C15C | C16C | 1.523 (4) |
| C5A  | C4A  | 1.537 (3) | C15C | C17C | 1.531 (3) |
| C5A  | C6A  | 1.555 (3) | C18C | C4C  | 1.501 (3) |
| C6A  | C7A  | 1.545 (3) | O1B  | C4B  | 1.467 (3) |
| C8A  | C7A  | 1.537 (3) | O1B  | C8B  | 1.468 (3) |
| C8A  | C9A  | 1.557 (3) | O2B  | C14B | 1.428 (3) |
| C8A  | C19A | 1.519 (3) | C1B  | C14B | 1.525 (4) |
| C10A | C9A  | 1.552 (3) | C1B  | C15B | 1.530 (4) |
| C11A | C10A | 1.504 (3) | C2B  | C1B  | 1.331 (3) |
| C11A | C12A | 1.328 (3) | C2B  | C3B  | 1.504 (3) |
| C13A | C12A | 1.518 (3) | C4B  | C3B  | 1.537 (3) |
| C14A | C13A | 1.543 (3) | C4B  | C5B  | 1.539 (3) |
| C15A | C16A | 1.533 (3) | C4B  | C18B | 1.503 (3) |
| C15A | C17A | 1.532 (3) | C6B  | C5B  | 1.558 (3) |
| C20A | C12A | 1.506 (3) | C7B  | C3B  | 1.550 (3) |
| O1C  | C4C  | 1.464 (3) | C7B  | C6B  | 1.543 (3) |
| O1C  | C8C  | 1.472 (3) | C7B  | C8B  | 1.537 (3) |
| O2C  | C14C | 1.429 (3) | C8B  | C9B  | 1.553 (3) |
| C1C  | C2C  | 1.340 (3) | C8B  | C19B | 1.529 (3) |
| C1C  | C14C | 1.518 (3) | C9B  | C10B | 1.549 (4) |
| C1C  | C15C | 1.528 (3) | C11B | C10B | 1.498 (4) |
| C3C  | C2C  | 1.505 (3) | C11B | C12B | 1.332 (4) |
| C3C  | C4C  | 1.540 (3) | C13B | C12B | 1.515 (4) |
| C3C  | C7C  | 1.550 (3) | C13B | C14B | 1.540 (4) |
| C4C  | C5C  | 1.526 (3) | C15B | C16B | 1.524 (4) |
| C6C  | C5C  | 1.551 (4) | C15B | C17B | 1.533 (4) |
| C7C  | C6C  | 1.545 (3) | C20B | C12B | 1.505 (3) |

Table 5 Bond Angles for compound 1.

| Atom | Atom | Atom | Angle/ °    | Atom | Atom | Atom | Angle/ °    |
|------|------|------|-------------|------|------|------|-------------|
| C4A  | O1A  | C8A  | 107.72 (16) | O1C  | C8C  | C7C  | 101.03 (19) |
| C2A  | C1A  | C14A | 124.4 (2)   | O1C  | C8C  | C9C  | 108.0 (2)   |
| C2A  | C1A  | C15A | 121.5 (2)   | O1C  | C8C  | C19C | 108.5 (2)   |
| C14A | C1A  | C15A | 114.10 (19) | C7C  | C8C  | C9C  | 114.2 (2)   |
| C1A  | C2A  | C3A  | 126.6 (2)   | C19C | C8C  | C7C  | 115.3 (2)   |
| C2A  | C3A  | C4A  | 119.89 (18) | C19C | C8C  | C9C  | 109.1 (2)   |
| C2A  | C3A  | C7A  | 113.73 (18) | C10C | C9C  | C8C  | 116.5 (2)   |
| C4A  | C3A  | C7A  | 91.71 (17)  | C11C | C10C | C9C  | 110.6 (2)   |
| O1A  | C4A  | C3A  | 100.95 (17) | C12C | C11C | C10C | 130.7 (2)   |
| O1A  | C4A  | C5A  | 106.65 (17) | C11C | C12C | C13C | 118.9 (2)   |
| O1A  | C4A  | C18A | 108.15 (18) | C11C | C12C | C20C | 125.8 (2)   |
| C5A  | C4A  | C3A  | 104.11 (18) | C20C | C12C | C13C | 115.2 (2)   |
| C18A | C4A  | C3A  | 119.58 (19) | C12C | C13C | C14C | 113.0 (2)   |
| C18A | C4A  | C5A  | 115.79 (19) | O2C  | C14C | C1C  | 107.94 (18) |
| C4A  | C5A  | C6A  | 102.24 (18) | O2C  | C14C | C13C | 110.04 (19) |
| C7A  | C6A  | C5A  | 102.63 (18) | C1C  | C14C | C13C | 112.60 (19) |
| C6A  | C7A  | C3A  | 102.12 (18) | C1C  | C15C | C17C | 113.3 (2)   |
| C8A  | C7A  | C3A  | 100.18 (18) | C16C | C15C | C1C  | 110.4 (2)   |
| C8A  | C7A  | C6A  | 110.75 (19) | C16C | C15C | C17C | 110.7 (2)   |
| O1A  | C8A  | C7A  | 101.03 (17) | C4B  | O1B  | C8B  | 107.59 (17) |
| O1A  | C8A  | C9A  | 109.12 (18) | C2B  | C1B  | C14B | 124.4 (2)   |
| O1A  | C8A  | C19A | 107.70 (19) | C2B  | C1B  | C15B | 120.8 (2)   |
| C7A  | C8A  | C9A  | 112.99 (19) | C14B | C1B  | C15B | 114.8 (2)   |
| C19A | C8A  | C7A  | 116.0 (2)   | C1B  | C2B  | C3B  | 126.8 (2)   |
| C19A | C8A  | C9A  | 109.4 (2)   | C2B  | C3B  | C4B  | 118.98 (19) |
| C10A | C9A  | C8A  | 115.71 (19) | C2B  | C3B  | C7B  | 114.46 (19) |
| C11A | C10A | C9A  | 111.1 (2)   | C4B  | C3B  | C7B  | 91.96 (17)  |
| C12A | C11A | C10A | 131.2 (2)   | O1B  | C4B  | C3B  | 100.67 (17) |
| C11A | C12A | C13A | 119.4 (2)   | O1B  | C4B  | C5B  | 106.56 (18) |
| C11A | C12A | C20A | 125.8 (2)   | O1B  | C4B  | C18B | 108.73 (18) |
| C20A | C12A | C13A | 114.7 (2)   | C3B  | C4B  | C5B  | 104.19 (19) |
| C12A | C13A | C14A | 112.27 (19) | C18B | C4B  | C3B  | 118.78 (19) |
| O2A  | C14A | C1A  | 110.41 (18) | C18B | C4B  | C5B  | 116.2 (2)   |
| O2A  | C14A | C13A | 106.26 (18) | C4B  | C5B  | C6B  | 102.35 (18) |
| C1A  | C14A | C13A | 113.17 (19) | C7B  | C6B  | C5B  | 102.37 (18) |
| C1A  | C15A | C16A | 111.6 (2)   | C6B  | C7B  | C3B  | 102.15 (18) |
| C1A  | C15A | C17A | 113.6 (2)   | C8B  | C7B  | C3B  | 99.74 (18)  |
| C17A | C15A | C16A | 110.6 (2)   | C8B  | C7B  | C6B  | 111.07 (19) |
| C4C  | O1C  | C8C  | 108.10 (18) | O1B  | C8B  | C7B  | 101.47 (18) |
| C2C  | C1C  | C14C | 123.7 (2)   | O1B  | C8B  | C9B  | 109.04 (19) |
| C2C  | C1C  | C15C | 121.8 (2)   | O1B  | C8B  | C19B | 107.4 (2)   |
| C14C | C1C  | C15C | 114.51 (19) | C7B  | C8B  | C9B  | 113.8 (2)   |
| C1C  | C2C  | C3C  | 126.2 (2)   | C19B | C8B  | C7B  | 115.9 (2)   |
| C2C  | C3C  | C4C  | 119.27 (19) | C19B | C8B  | C9B  | 108.7 (2)   |
| C2C  | C3C  | C7C  | 114.69 (19) | C10B | C9B  | C8B  | 116.1 (2)   |
| C4C  | C3C  | C7C  | 92.28 (17)  | C11B | C10B | C9B  | 111.4 (2)   |
| O1C  | C4C  | C3C  | 100.72 (18) | C12B | C11B | C10B | 130.5 (2)   |
| O1C  | C4C  | C5C  | 105.97 (19) | C11B | C12B | C13B | 118.7 (2)   |
| O1C  | C4C  | C18C | 108.0 (2)   | C11B | C12B | C20B | 125.9 (2)   |
| C5C  | C4C  | C3C  | 104.1 (2)   | C20B | C12B | C13B | 115.3 (2)   |
| C18C | C4C  | C3C  | 118.3 (2)   | C12B | C13B | C14B | 114.2 (2)   |
| C18C | C4C  | C5C  | 117.9 (2)   | O2B  | C14B | C1B  | 112.2 (2)   |
| C4C  | C5C  | C6C  | 102.4 (2)   | O2B  | C14B | C13B | 104.4 (2)   |
| C7C  | O6C  | C5C  | 103.0 (2)   | C1B  | C14B | C13B | 113.4 (2)   |
| C6C  | C7C  | C3C  | 101.70 (19) | C1B  | C15B | C17B | 113.1 (2)   |
| C8C  | C7C  | C3C  | 99.26 (18)  | C16B | C15B | C1B  | 111.5 (2)   |
| C8C  | C7C  | C6C  | 111.2 (2)   | C16B | C15B | C17B | 109.6 (3)   |

Table 6 Torsion Angles for compound 1.

|      | A    | B    | C    | D | Angle/°      |
|------|------|------|------|---|--------------|
| 01A  | C4A  | C3A  | C2A  |   | -173.91 (18) |
| 01A  | C4A  | C3A  | C7A  |   | -55.13 (18)  |
| 01A  | C8A  | C7A  | C3A  |   | -39.2 (2)    |
| 01A  | C8A  | C7A  | C6A  |   | 68.1 (2)     |
| 01A  | C8A  | C9A  | C10A |   | 149.0 (2)    |
| 02A  | C14A | C13A | C12A |   | -172.26 (18) |
| C1A  | C2A  | C3A  | C4A  |   | -146.2 (2)   |
| C1A  | C2A  | C3A  | C7A  |   | 106.9 (3)    |
| C1A  | C14A | C13A | C12A |   | 66.4 (3)     |
| C2A  | C1A  | C14A | O2A  |   | 143.5 (2)    |
| C2A  | C1A  | C14A | C13A |   | -97.6 (3)    |
| C2A  | C1A  | C15A | C16A |   | -83.9 (3)    |
| C2A  | C1A  | C15A | C17A |   | 42.0 (3)     |
| C2A  | C3A  | C7A  | C6A  |   | 67.2 (2)     |
| C2A  | C3A  | C7A  | C8A  |   | -178.80 (18) |
| C4A  | O1A  | C8A  | C7A  |   | 3.3 (2)      |
| C4A  | O1A  | C8A  | C9A  |   | -115.97 (19) |
| C4A  | O1A  | C8A  | C19A |   | 125.40 (19)  |
| C4A  | C3A  | C7A  | C6A  |   | -56.70 (19)  |
| C4A  | C3A  | C7A  | C8A  |   | 57.30 (18)   |
| C4A  | C5A  | C6A  | C7A  |   | -3.2 (2)     |
| C5A  | C4A  | C3A  | C2A  |   | -63.4 (2)    |
| C5A  | C4A  | C3A  | C7A  |   | 55.34 (19)   |
| C5A  | C6A  | C7A  | C3A  |   | 38.7 (2)     |
| C5A  | C6A  | C7A  | C8A  |   | -67.2 (2)    |
| C6A  | C5A  | C4A  | O1A  |   | 72.5 (2)     |
| C6A  | C5A  | C4A  | C3A  |   | -33.8 (2)    |
| C6A  | C5A  | C4A  | C18A |   | -167.16 (19) |
| C7A  | C8A  | C9A  | C10A |   | 37.5 (3)     |
| C8A  | O1A  | C4A  | C3A  |   | 34.1 (2)     |
| C8A  | O1A  | C4A  | C5A  |   | -74.4 (2)    |
| C8A  | O1A  | C4A  | C18A |   | 160.39 (18)  |
| C9A  | C8A  | C7A  | C3A  |   | 77.3 (2)     |
| C9A  | C8A  | C7A  | C6A  |   | -175.50 (19) |
| C10A | C11A | C12A | C13A |   | -169.4 (2)   |
| C10A | C11A | C12A | C20A |   | 7.3 (4)      |
| C11A | C10A | C9A  | C8A  |   | -89.3 (2)    |
| C12A | C11A | C10A | C9A  |   | 116.9 (3)    |
| C14A | C1A  | C2A  | C3A  |   | 7.7 (4)      |
| C14A | C1A  | C15A | C16A |   | 96.3 (2)     |
| C14A | C1A  | C15A | C17A |   | -137.8 (2)   |
| C14A | C13A | C12A | C11A |   | 66.6 (3)     |
| C14A | C13A | C12A | C20A |   | -110.5 (2)   |
| C15A | C1A  | C2A  | C3A  |   | -172.1 (2)   |
| C15A | C1A  | C14A | O2A  |   | -36.7 (3)    |
| C15A | C1A  | C14A | C13A |   | 82.2 (2)     |
| C18A | C4A  | C3A  | C2A  |   | 67.8 (3)     |
| C18A | C4A  | C3A  | C7A  |   | -173.5 (2)   |
| C19A | C8A  | C7A  | C3A  |   | -155.3 (2)   |
| C19A | C8A  | C7A  | C6A  |   | -48.0 (3)    |
| C19A | C8A  | C9A  | C10A |   | -93.4 (2)    |
| O1C  | C4C  | C5C  | C6C  |   | 71.9 (2)     |
| O1C  | C8C  | C9C  | C10C |   | 149.5 (2)    |
| O2C  | C14C | C13C | C12C |   | -170.72 (19) |
| C1C  | C14C | C13C | C12C |   | 68.8 (3)     |
| C2C  | C1C  | C14C | O2C  |   | 141.6 (2)    |
| C2C  | C1C  | C14C | C13C |   | -96.7 (3)    |
| C2C  | C1C  | C15C | C16C |   | -78.1 (3)    |

|      |      |      |      |              |
|------|------|------|------|--------------|
| C2C  | C1C  | C15C | C17C | 46.6 (3)     |
| C2C  | C3C  | C4C  | 01C  | -174.46 (19) |
| C2C  | C3C  | C4C  | C5C  | -64.8 (3)    |
| C2C  | C3C  | C4C  | C18C | 68.2 (3)     |
| C2C  | C3C  | C7C  | C6C  | 67.9 (2)     |
| C2C  | C3C  | C7C  | C8C  | -178.08 (19) |
| C3C  | C4C  | C5C  | C6C  | -33.8 (2)    |
| C3C  | C7C  | C6C  | C5C  | 38.0 (2)     |
| C3C  | C7C  | C8C  | 01C  | -41.0 (2)    |
| C3C  | C7C  | C8C  | C9C  | 74.7 (2)     |
| C3C  | C7C  | C8C  | C19C | -157.8 (2)   |
| C4C  | 01C  | C8C  | C7C  | 5.9 (2)      |
| C4C  | 01C  | C8C  | C9C  | -114.3 (2)   |
| C4C  | 01C  | C8C  | C19C | 127.6 (2)    |
| C4C  | C3C  | C2C  | C1C  | -140.5 (2)   |
| C4C  | C3C  | C7C  | C6C  | -56.0 (2)    |
| C4C  | C3C  | C7C  | C8C  | 58.1 (2)     |
| C6C  | C7C  | C8C  | 01C  | 65.5 (2)     |
| C6C  | C7C  | C8C  | C9C  | -178.8 (2)   |
| C6C  | C7C  | C8C  | C19C | -51.3 (3)    |
| C7C  | C3C  | C2C  | C1C  | 111.6 (3)    |
| C7C  | C3C  | C4C  | 01C  | -54.36 (18)  |
| C7C  | C3C  | C4C  | C5C  | 55.3 (2)     |
| C7C  | C3C  | C4C  | C18C | -171.7 (2)   |
| C7C  | C6C  | C5C  | C4C  | -2.8 (2)     |
| C7C  | C8C  | C9C  | C10C | 37.9 (3)     |
| C8C  | 01C  | C4C  | C3C  | 31.7 (2)     |
| C8C  | 01C  | C4C  | C5C  | -76.4 (2)    |
| C8C  | 01C  | C4C  | C18C | 156.38 (19)  |
| C8C  | C7C  | C6C  | C5C  | -66.9 (2)    |
| C9C  | C10C | C11C | C12C | 115.9 (3)    |
| C11C | C10C | C9C  | C8C  | -90.8 (3)    |
| C11C | C12C | C13C | C14C | 65.2 (3)     |
| C13C | C12C | C11C | C10C | -167.1 (2)   |
| C14C | C1C  | C2C  | C3C  | 5.6 (4)      |
| C14C | C1C  | C15C | C16C | 101.1 (3)    |
| C14C | C1C  | C15C | C17C | -134.1 (2)   |
| C15C | C1C  | C2C  | C3C  | -175.2 (2)   |
| C15C | C1C  | C14C | 02C  | -37.6 (3)    |
| C15C | C1C  | C14C | C13C | 84.1 (2)     |
| C18C | C4C  | C5C  | C6C  | -167.1 (2)   |
| C19C | C8C  | C9C  | C10C | -92.7 (3)    |
| C20C | C12C | C11C | C10C | 10.4 (4)     |
| C20C | C12C | C13C | C14C | -112.6 (2)   |
| 01B  | C4B  | C3B  | C2B  | -174.95 (18) |
| 01B  | C4B  | C3B  | C7B  | -55.44 (18)  |
| 01B  | C4B  | C5B  | C6B  | 73.0 (2)     |
| 01B  | C8B  | C9B  | C10B | 146.0 (2)    |
| C1B  | C2B  | C3B  | C4B  | -142.0 (2)   |
| C1B  | C2B  | C3B  | C7B  | 110.8 (3)    |
| C2B  | C1B  | C14B | 02B  | 148.5 (2)    |
| C2B  | C1B  | C14B | C13B | -93.4 (3)    |
| C2B  | C1B  | C15B | C16B | -82.4 (3)    |
| C2B  | C1B  | C15B | C17B | 41.7 (4)     |
| C3B  | C2B  | C1B  | C14B | 5.7 (4)      |
| C3B  | C2B  | C1B  | C15B | -173.8 (2)   |
| C3B  | C4B  | C5B  | C6B  | -32.9 (2)    |
| C3B  | C7B  | C6B  | C5B  | 39.2 (2)     |
| C3B  | C7B  | C8B  | 01B  | -38.8 (2)    |
| C3B  | C7B  | C8B  | C9B  | 78.1 (2)     |
| C3B  | C7B  | C8B  | C19B | -154.8 (2)   |
| C4B  | 01B  | C8B  | C7B  | 3.0 (2)      |

|      |      |      |      |              |
|------|------|------|------|--------------|
| C4B  | O1B  | C8B  | C9B  | -117.4 (2)   |
| C4B  | O1B  | C8B  | C19B | 125.0 (2)    |
| C5B  | C4B  | C3B  | C2B  | -64.7 (2)    |
| C5B  | C4B  | C3B  | C7B  | 54.9 (2)     |
| C6B  | C7B  | C3B  | C2B  | 66.3 (2)     |
| C6B  | C7B  | C3B  | C4B  | -56.9 (2)    |
| C6B  | C7B  | C8B  | O1B  | 68.3 (2)     |
| C6B  | C7B  | C8B  | C9B  | -174.7 (2)   |
| C6B  | C7B  | C8B  | C19B | -47.7 (3)    |
| C7B  | C6B  | C5B  | C4B  | -4.0 (2)     |
| C7B  | C8B  | C9B  | C10B | 33.6 (3)     |
| C8B  | O1B  | C4B  | C3B  | 34.4 (2)     |
| C8B  | O1B  | C4B  | C5B  | -74.0 (2)    |
| C8B  | O1B  | C4B  | C18B | 159.94 (18)  |
| C8B  | C7B  | C3B  | C2B  | -179.50 (19) |
| C8B  | C7B  | C3B  | C4B  | 57.26 (19)   |
| C8B  | C7B  | C6B  | C5B  | -66.3 (2)    |
| C8B  | C9B  | C10B | C11B | -87.7 (3)    |
| C10B | C11B | C12B | C13B | -169.8 (2)   |
| C10B | C11B | C12B | C20B | 7.9 (4)      |
| C12B | C11B | C10B | C9B  | 117.8 (3)    |
| C12B | C13B | C14B | O2B  | -173.8 (2)   |
| C12B | C13B | C14B | C1B  | 63.8 (3)     |
| C14B | C1B  | C15B | C16B | 98.0 (3)     |
| C14B | C1B  | C15B | C17B | -138.0 (3)   |
| C14B | C13B | C12B | C11B | 68.3 (3)     |
| C14B | C13B | C12B | C20B | -109.6 (3)   |
| C15B | C1B  | C14B | O2B  | -31.9 (3)    |
| C15B | C1B  | C14B | C13B | 86.2 (3)     |
| C18B | C4B  | C3B  | C2B  | 66.6 (3)     |
| C18B | C4B  | C3B  | C7B  | -173.9 (2)   |
| C18B | C4B  | C5B  | C6B  | -165.7 (2)   |
| C19B | C8B  | C9B  | C10B | -97.2 (3)    |

Table 7 Hydrogen Atom Coordinates ( $\text{\AA} \times 10^4$ ) and Isotropic Displacement Parameters ( $\text{\AA}^2 \times 10^3$ ) for compound **1**.

| Atom | <i>x</i> | <i>y</i> | <i>z</i> | U(eq) |
|------|----------|----------|----------|-------|
| H2A  | -13146   | -2645    | -1005    | 33    |
| H2B  | -13440   | -4216    | -146     | 19    |
| H3A  | -14115   | -5632    | -622     | 18    |
| H5A  | -15075   | -5291    | 132      | 21    |
| H5B  | -15686   | -6596    | 124      | 21    |
| H6A  | -12956   | -6018    | 106      | 23    |
| H6B  | -13563   | -7323    | 117      | 23    |
| H7A  | -12403   | -6780    | -348     | 19    |
| H9A  | -14375   | -8654    | -781     | 25    |
| H9B  | -14510   | -7292    | -846     | 25    |
| H10A | -11946   | -8100    | -666     | 27    |
| H10B | -12371   | -8377    | -981     | 27    |
| H11A | -12568   | -6328    | -1066    | 24    |
| H13A | -10387   | -4238    | -818     | 23    |
| H13B | -11087   | -4618    | -1104    | 23    |
| H14A | -13261   | -4385    | -886     | 20    |
| H15A | -11074   | -2576    | -524     | 23    |
| H16A | -12089   | -1000    | -298     | 43    |
| H16B | -13347   | -1792    | -213     | 43    |
| H16C | -13081   | -1484    | -534     | 43    |
| H17A | -10473   | -2384    | -60      | 43    |
| H17B | -11738   | -3137    | 39       | 43    |
| H17C | -10545   | -3750    | -130     | 43    |

|      |        |       |       |    |
|------|--------|-------|-------|----|
| H18A | -16481 | -4369 | -275  | 28 |
| H18B | -17403 | -5506 | -247  | 28 |
| H18C | -16780 | -5158 | -543  | 28 |
| H19A | -14598 | -8641 | -69   | 39 |
| H19B | -15011 | -9299 | -350  | 39 |
| H19C | -13462 | -9160 | -269  | 39 |
| H20A | -10375 | -5638 | -413  | 30 |
| H20B | -10373 | -6979 | -507  | 30 |
| H20C | -9315  | -6086 | -640  | 30 |
| H2E  | -13090 | -2229 | -4304 | 35 |
| H2F  | -13158 | -4512 | -3454 | 21 |
| H3C  | -13780 | -5468 | -3996 | 20 |
| H5E  | -14745 | -5895 | -3248 | 31 |
| H5F  | -15267 | -7187 | -3327 | 31 |
| H6E  | -12587 | -6475 | -3306 | 32 |
| H6F  | -13106 | -7782 | -3370 | 32 |
| H7C  | -11970 | -6739 | -3788 | 25 |
| H9E  | -13883 | -8194 | -4323 | 31 |
| H9F  | -14130 | -6820 | -4301 | 31 |
| H10E | -11473 | -7607 | -4194 | 34 |
| H10F | -11956 | -7604 | -4512 | 34 |
| H11C | -12343 | -5541 | -4480 | 26 |
| H13E | -10368 | -3592 | -4121 | 25 |
| H13F | -11076 | -3722 | -4419 | 25 |
| H14C | -13214 | -3956 | -4180 | 20 |
| H15C | -11265 | -2216 | -3752 | 26 |
| H16G | -12448 | -1139 | -3422 | 57 |
| H16H | -13442 | -2211 | -3365 | 57 |
| H16I | -13469 | -1554 | -3660 | 57 |
| H17G | -10490 | -2424 | -3294 | 54 |
| H17H | -11476 | -3507 | -3243 | 54 |
| H17I | -10256 | -3623 | -3458 | 54 |
| H18G | -16214 | -4682 | -3605 | 35 |
| H18H | -17058 | -5858 | -3648 | 35 |
| H18I | -16410 | -5214 | -3911 | 35 |
| H19G | -13934 | -8968 | -3635 | 52 |
| H19H | -14350 | -9328 | -3946 | 52 |
| H19I | -12801 | -9167 | -3867 | 52 |
| H20G | -10082 | -5434 | -3819 | 39 |
| H20H | -9887  | -6567 | -4010 | 39 |
| H20I | -9032  | -5412 | -4072 | 39 |
| H2C  | -11892 | -6995 | -2766 | 56 |
| H2D  | -11656 | -5800 | -1889 | 23 |
| H3B  | -11084 | -4073 | -2310 | 19 |
| H5C  | -10006 | -4879 | -1583 | 24 |
| H5D  | -9459  | -3562 | -1545 | 24 |
| H6C  | -12167 | -4231 | -1574 | 24 |
| H6D  | -11620 | -2928 | -1513 | 24 |
| H7B  | -12803 | -3180 | -1989 | 21 |
| H9C  | -10991 | -949  | -2343 | 28 |
| H9D  | -10731 | -2221 | -2468 | 28 |
| H10C | -13350 | -1735 | -2258 | 30 |
| H10D | -12961 | -1219 | -2558 | 30 |
| H11B | -12590 | -3170 | -2720 | 29 |
| H13C | -14642 | -5489 | -2564 | 36 |
| H13D | -13929 | -4885 | -2826 | 36 |
| H14B | -11777 | -5237 | -2618 | 31 |
| H15B | -13811 | -7376 | -2325 | 40 |
| H16D | -12640 | -8968 | -2156 | 56 |
| H16E | -11515 | -8148 | -2021 | 56 |
| H16F | -11641 | -8247 | -2353 | 56 |
| H17D | -14340 | -7877 | -1865 | 93 |

|      |        |       |       |    |
|------|--------|-------|-------|----|
| H17E | -13190 | -7035 | -1748 | 93 |
| H17F | -14479 | -6491 | -1899 | 93 |
| H18D | -8666  | -5495 | -2031 | 27 |
| H18E | -7759  | -4378 | -1963 | 27 |
| H18F | -8418  | -4523 | -2265 | 27 |
| H19D | -10662 | -1475 | -1647 | 43 |
| H19E | -10243 | -633  | -1899 | 43 |
| H19F | -11794 | -829  | -1827 | 43 |
| H20D | -14700 | -4325 | -2096 | 35 |
| H20E | -14922 | -2971 | -2165 | 35 |
| H20F | -15827 | -3940 | -2315 | 35 |

## Experimental

Single crystals of C<sub>20</sub>H<sub>32</sub>O<sub>2</sub> [exp\_1415] were recrystallised from [solvents] mounted in inert oil and transferred to the cold gas stream of the diffractometer.

### Crystal structure determination of [exp\_1415]

Crystal Data. C<sub>20</sub>H<sub>32</sub>O<sub>2</sub>,  $M = 304.46$ , orthorhombic,  $a = 9.9686(2) \text{ \AA}$ ,  $b = 11.4498(3) \text{ \AA}$ ,  $c = 47.9528(18) \text{ \AA}$ ,  $U = 5473.2(3) \text{ \AA}^3$ ,  $T = 97.3$ , space group P2<sub>1</sub>2<sub>1</sub>2<sub>1</sub> (no. 19),  $Z = 12$ ,  $\mu(\text{Cu K}\alpha) = 0.532$ , 20784 reflections measured, 10157 unique ( $R_{\text{int}} = 0.0455$ ) which were used in all calculations. The final  $wR(F_2)$  was 0.1279 (all data).

This report has been created with Olex2, compiled on 2011.02.15 svn.r1672. Please let us know if there are any errors or if you would like to have additional features.

**Figure S34.** ORTEP depiction for X-ray crystal structure of **2**.**compound 2**

Crystal Submitted by:  
 Crystal Submitted on:  
 Data Collected on:  
 Structure Solved by:

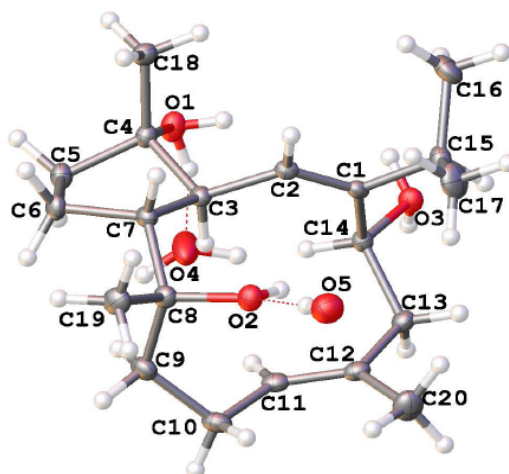

Table 1: Crystal data and structure refinement for compound 2

|                                                                         |                                                   |
|-------------------------------------------------------------------------|---------------------------------------------------|
| Identification code                                                     | exp_1423                                          |
| Empirical formula                                                       | C <sub>20</sub> H <sub>36</sub> O <sub>4</sub>    |
| Formula weight                                                          | 340.49                                            |
| Temperature/K                                                           | 98.0                                              |
| Crystal system                                                          | monoclinic                                        |
| Space group                                                             | C2                                                |
| a/Å, b/Å, c/Å                                                           | 16.6326(11), 9.5624(4), 13.5122(10)               |
| α/°, β/°, γ/°                                                           | 90.00, 115.405(7), 90.00                          |
| Volume/Å <sup>3</sup>                                                   | 1941.3(2)                                         |
| Z                                                                       | 4                                                 |
| ρ <sub>calc</sub> /mg mm <sup>-3</sup>                                  | 1.165                                             |
| μ/mm <sup>-1</sup>                                                      | 0.626                                             |
| F(000)                                                                  | 752                                               |
| Crystal size/mm <sup>3</sup>                                            | 0.40 × 0.38 × 0.32                                |
| 2θ range for data collection                                            | 7.24 to 143.6°                                    |
| Index ranges                                                            | -20 ≤ h ≤ 19, -11 ≤ k ≤ 11, -16 ≤ l ≤ 14          |
| Reflections collected                                                   | 8710                                              |
| Independent reflections                                                 | 3737 [R(int) = 0.0169 (inf-0.9Å)]                 |
| Data/restraints/parameters                                              | 3737/3/231                                        |
| Goodness-of-fit on F <sup>2</sup>                                       | 1.046                                             |
| Final R indexes [I > 2σ (I) i.e. F <sub>o</sub> > 4σ (F <sub>o</sub> )] | R <sub>1</sub> = 0.0338, wR <sub>2</sub> = 0.0898 |
| Final R indexes [all data]                                              | R <sub>1</sub> = 0.0341, wR <sub>2</sub> = 0.0901 |
| Largest diff. peak/hole/e Å <sup>-3</sup>                               | 0.267/-0.172                                      |
| Flack Parameters                                                        | 0.13(13)                                          |
| Completeness                                                            | 0.991                                             |



Table 2 Fractional Atomic Coordinates ( $\times 10^4$ ) and Equivalent Isotropic Displacement Parameters ( $\text{\AA}^2 \times 10^3$ ) for compound 2.  $U_{\text{eq}}$  is defined as 1/3 of of the trace of the orthogonalised  $U_{\text{IJ}}$  tensor.

| Atom | x          | y            | z          | U(eq)   |
|------|------------|--------------|------------|---------|
| O1   | 5040.6(6)  | -8558.2(11)  | 3339.3(7)  | 20.5(2) |
| O2   | 1460.5(6)  | -7579.9(10)  | 1250.5(7)  | 18.5(2) |
| O3   | 4336.2(6)  | -6227.8(10)  | 5356.1(7)  | 17.3(2) |
| C1   | 3387.1(8)  | -6038.8(13)  | 3431.7(10) | 12.9(2) |
| C2   | 3342.0(8)  | -6590.3(13)  | 2500.1(10) | 13.6(2) |
| C3   | 3435.5(8)  | -8100.4(13)  | 2244.9(10) | 13.8(3) |
| C4   | 4338.3(8)  | -8523.1(13)  | 2249.4(9)  | 14.8(3) |
| C5   | 4125.1(9)  | -9996.8(14)  | 1755.8(11) | 18.4(3) |
| C6   | 3189.7(9)  | -9858.9(14)  | 811.8(10)  | 18.7(3) |
| C7   | 2747.4(8)  | -8571.1(14)  | 1093(1)    | 15.2(2) |
| C8   | 1794.2(8)  | -8839.7(14)  | 977.7(10)  | 16.6(3) |
| C9   | 1737.0(9)  | -10117.9(15) | 1669.4(11) | 20.4(3) |
| C10  | 1428.2(9)  | -9798.4(15)  | 2571.1(11) | 20.3(3) |
| C11  | 2113.8(9)  | -8980.6(14)  | 3504.4(10) | 17.0(3) |
| C12  | 2024.6(8)  | -7755.5(14)  | 3921.3(10) | 16.8(3) |
| C13  | 2831.7(8)  | -7030.0(14)  | 4789.8(10) | 16.7(3) |
| C14  | 3606.9(8)  | -6895.2(13)  | 4462.8(10) | 13.7(2) |
| C15  | 3239.1(9)  | -4470.9(13)  | 3519.8(11) | 18.3(3) |
| C16  | 3980.4(11) | -3597.9(16)  | 3437.4(13) | 27.9(3) |
| C17  | 2330.1(11) | -3980.9(16)  | 2656.0(14) | 29.2(3) |
| C18  | 4642.0(9)  | -7554.5(15)  | 1577.5(11) | 19.1(3) |
| C19  | 1180.7(9)  | -9061.2(16)  | -235.6(11) | 22.3(3) |
| C20  | 1152.7(9)  | -7011.7(18)  | 3594.7(13) | 28.6(3) |
| O4   | 5000       | -10165.5(17) | 5000       | 38.9(4) |
| O5   | 0          | -5745.6(18)  | 0          | 30.4(3) |

Table 3 Anisotropic Displacement Parameters ( $\text{\AA}^2 \times 10^3$ ) for compound 2. The Anisotropic displacement factor exponent takes the form:  $-2 \pi^2 [h^2 a^2 U_{11} + \dots + 2hka \times b \times U_{12}]$

| Atom | $U_{11}$ | $U_{22}$ | $U_{33}$ | $U_{23}$ | $U_{13}$ | $U_{12}$ |
|------|----------|----------|----------|----------|----------|----------|
| O1   | 17.6(4)  | 24.2(5)  | 15.2(4)  | -1.9(4)  | 2.8(4)   | 4.7(4)   |
| O2   | 16.9(4)  | 21.1(5)  | 14.5(4)  | -1.3(4)  | 4.0(3)   | 1.3(4)   |
| O3   | 14.4(4)  | 19.8(4)  | 14.4(4)  | -1.7(3)  | 3.0(3)   | -0.1(3)  |
| C1   | 11.2(5)  | 11.7(6)  | 15.6(6)  | 0.4(4)   | 5.4(4)   | -1.2(4)  |
| C2   | 12.1(5)  | 14.4(6)  | 12.9(5)  | 2.0(5)   | 4.1(4)   | -0.7(4)  |
| C3   | 15.4(6)  | 13.8(6)  | 12.1(5)  | -0.2(4)  | 5.6(5)   | -1.0(4)  |
| C4   | 14.6(6)  | 15.8(6)  | 13.1(5)  | -0.4(5)  | 5.2(5)   | 1.5(5)   |
| C5   | 20.8(6)  | 16.3(6)  | 17.9(6)  | -1.8(5)  | 8.1(5)   | 1.8(5)   |
| C6   | 20.2(6)  | 18.7(6)  | 17.0(6)  | -6.1(5)  | 7.7(5)   | -1.0(5)  |
| C7   | 16.6(6)  | 15.7(6)  | 13.2(5)  | -1.6(5)  | 6.3(5)   | -2.5(5)  |
| C8   | 15.5(6)  | 18.3(6)  | 14.7(6)  | -2.5(5)  | 5.3(5)   | -2.4(5)  |
| C9   | 21.8(6)  | 18.8(6)  | 19.5(6)  | -3.6(5)  | 7.8(5)   | -6.7(5)  |
| C10  | 19.2(6)  | 21.9(7)  | 19.1(6)  | 0.8(5)   | 7.5(5)   | -7.2(5)  |
| C11  | 16.0(6)  | 20.5(6)  | 15.1(6)  | 3.5(5)   | 7.3(5)   | -2.2(5)  |
| C12  | 15.3(6)  | 21.2(6)  | 15.2(6)  | 2.0(5)   | 7.8(5)   | -1.9(5)  |
| C13  | 17.8(6)  | 19.1(7)  | 15.4(6)  | -0.7(5)  | 9.2(5)   | -0.7(5)  |
| C14  | 13.1(5)  | 13.3(5)  | 13.1(6)  | -0.4(4)  | 4.1(4)   | 0.5(4)   |
| C15  | 25.1(6)  | 14.2(6)  | 15.3(6)  | -0.6(5)  | 8.5(5)   | 1.2(5)   |
| C16  | 35.6(8)  | 15.3(6)  | 30.9(7)  | -1.1(6)  | 12.4(6)  | -6.4(6)  |
| C17  | 30.7(8)  | 19.2(7)  | 32.8(8)  | 2.0(6)   | 9.1(6)   | 10.6(6)  |
| C18  | 16.9(6)  | 20.6(6)  | 20.9(6)  | 0.1(5)   | 9.3(5)   | -1.0(5)  |
| C19  | 18.8(6)  | 27.6(7)  | 16.8(6)  | -5.1(5)  | 4.1(5)   | -4.2(6)  |
| C20  | 18.5(6)  | 32.6(8)  | 32.8(8)  | -4.8(6)  | 9.2(6)   | 1.2(6)   |
| O4   | 72.7(12) | 20.1(7)  | 40.6(9)  | 0        | 40.2(9)  | 0        |
| O5   | 29.0(8)  | 31.2(8)  | 31.7(8)  | 0        | 13.9(6)  | 0        |

Table 4 Bond Lengths for compound 2.

| Atom | Atom | Length/Å   | Atom | Atom | Length/Å   |
|------|------|------------|------|------|------------|
| O1   | C4   | 1.4347(14) | C8   | C19  | 1.5292(17) |
| O2   | C8   | 1.4391(16) | C9   | C10  | 1.5423(19) |
| C1   | C15  | 1.5323(17) | C11  | C10  | 1.5062(18) |
| C2   | C1   | 1.3368(18) | C12  | C11  | 1.335(2)   |
| C2   | C3   | 1.5081(17) | C12  | C13  | 1.5195(17) |
| C4   | C3   | 1.5526(17) | C12  | C20  | 1.5015(19) |
| C5   | C4   | 1.5341(17) | C14  | O3   | 1.4419(15) |
| C5   | C6   | 1.5369(18) | C14  | C1   | 1.5194(17) |
| C7   | C3   | 1.5513(16) | C14  | C13  | 1.5372(16) |
| C7   | C6   | 1.5627(17) | C16  | C15  | 1.532(2)   |
| C7   | C8   | 1.5465(16) | C17  | C15  | 1.5342(19) |
| C8   | C9   | 1.5662(18) | C18  | C4   | 1.5265(17) |

Table 5 Bond Angles for compound 2.

| Atom | Atom | Atom | Angle/°    | Atom | Atom | Atom | Angle/°    |
|------|------|------|------------|------|------|------|------------|
| C2   | C1   | C14  | 123.03(11) | O2   | C8   | C9   | 111.81(10) |
| C2   | C1   | C15  | 120.88(11) | O2   | C8   | C19  | 103.72(10) |
| C14  | C1   | C15  | 116.08(11) | C7   | C8   | C9   | 113.05(11) |
| C1   | C2   | C3   | 128.56(11) | C19  | C8   | C7   | 108.35(10) |
| C2   | C3   | C4   | 116.29(10) | C19  | C8   | C9   | 110.38(11) |
| C2   | C3   | C7   | 113.78(10) | C10  | C9   | C8   | 116.29(12) |
| C7   | C3   | C4   | 102.97(10) | C11  | C10  | C9   | 112.03(11) |
| O1   | C4   | C3   | 111.73(9)  | C12  | C11  | C10  | 128.86(13) |
| O1   | C4   | C5   | 111.06(10) | C11  | C12  | C13  | 120.34(12) |
| O1   | C4   | C18  | 107.05(10) | C11  | C12  | C20  | 124.03(12) |
| C5   | C4   | C3   | 101.22(10) | C20  | C12  | C13  | 115.63(12) |
| C18  | C4   | C3   | 113.95(10) | C12  | C13  | C14  | 112.86(10) |
| C18  | C4   | C5   | 111.88(11) | O3   | C14  | C1   | 108.31(10) |
| C4   | C5   | C6   | 104.17(10) | O3   | C14  | C13  | 107.74(10) |
| C5   | C6   | C7   | 106.28(10) | C1   | C14  | C13  | 114.03(10) |
| C3   | C7   | C6   | 104.53(10) | C1   | C15  | C17  | 112.24(11) |
| C8   | C7   | C3   | 115.63(10) | C16  | C15  | C1   | 111.49(11) |
| C8   | C7   | C6   | 114.45(10) | C16  | C15  | C17  | 109.85(12) |
| O2   | C8   | C7   | 109.06(10) |      |      |      |            |

Table 6 Torsion Angles for compound 2.

| A  | B   | C   | D   | Angle/°     |
|----|-----|-----|-----|-------------|
| O1 | C4  | C3  | C2  | 71.96(13)   |
| O1 | C4  | C3  | C7  | -162.92(10) |
| O2 | C8  | C9  | C10 | -5.46(15)   |
| O3 | C14 | C1  | C2  | 126.98(12)  |
| O3 | C14 | C1  | C15 | -51.52(13)  |
| O3 | C14 | C13 | C12 | -178.56(10) |
| C1 | C2  | C3  | C4  | -103.14(14) |
| C1 | C2  | C3  | C7  | 137.44(13)  |
| C1 | C14 | C13 | C12 | 61.19(14)   |
| C2 | C1  | C15 | C16 | -66.41(16)  |
| C2 | C1  | C15 | C17 | 57.31(16)   |
| C3 | C2  | C1  | C14 | 3.9(2)      |
| C3 | C2  | C1  | C15 | -177.68(12) |
| C3 | C7  | C6  | C5  | -4.30(13)   |
| C3 | C7  | C8  | O2  | 58.80(14)   |
| C3 | C7  | C8  | C9  | -66.25(14)  |
| C3 | C7  | C8  | C19 | 171.07(11)  |
| C4 | C5  | C6  | C7  | -23.56(13)  |

|     |     |     |     |             |
|-----|-----|-----|-----|-------------|
| C5  | C4  | C3  | C2  | -169.78(10) |
| C5  | C4  | C3  | C7  | -44.67(11)  |
| C6  | C5  | C4  | O1  | 160.79(10)  |
| C6  | C5  | C4  | C3  | 42.05(12)   |
| C6  | C5  | C4  | C18 | -79.66(13)  |
| C6  | C7  | C3  | C2  | 156.85(10)  |
| C6  | C7  | C3  | C4  | 30.12(12)   |
| C6  | C7  | C8  | O2  | -179.62(10) |
| C6  | C7  | C8  | C9  | 55.33(14)   |
| C6  | C7  | C8  | C19 | -67.34(14)  |
| C7  | C8  | C9  | C10 | 118.09(12)  |
| C8  | C7  | C3  | C2  | -76.39(14)  |
| C8  | C7  | C3  | C4  | 156.88(10)  |
| C8  | C7  | C6  | C5  | -131.79(11) |
| C8  | C9  | C10 | C11 | -69.59(15)  |
| C11 | C12 | C13 | C14 | 50.81(16)   |
| C12 | C11 | C10 | C9  | 124.28(15)  |
| C13 | C12 | C11 | C10 | -173.35(11) |
| C13 | C14 | C1  | C2  | -113.09(13) |
| C13 | C14 | C1  | C15 | 68.41(14)   |
| C14 | C1  | C15 | C16 | 112.12(12)  |
| C14 | C1  | C15 | C17 | -124.15(12) |
| C18 | C4  | C3  | C2  | -49.53(14)  |
| C18 | C4  | C3  | C7  | 75.58(13)   |
| C19 | C8  | C9  | C10 | -120.37(12) |
| C20 | C12 | C11 | C10 | 7.3(2)      |
| C20 | C12 | C13 | C14 | -129.74(13) |

Table 7 Hydrogen Atom Coordinates ( $\text{\AA} \times 10^4$ ) and Isotropic Displacement Parameters ( $\text{\AA}^2 \times 10^3$ ) for compound **2**.

| Atom | x    | y      | z    | U(eq) |
|------|------|--------|------|-------|
| H1A  | 4846 | -8852  | 3763 | 31    |
| H1B  | 5028 | -7840  | 3664 | 31    |
| H2A  | 1798 | -7333  | 1872 | 28    |
| H2B  | 3239 | -5959  | 1935 | 16    |
| H3A  | 4761 | -6153  | 5202 | 5(6)  |
| H3B  | 4508 | -6733  | 5899 | 26    |
| H3C  | 3348 | -8679  | 2789 | 17    |
| H5B  | 4553 | -10288 | 1485 | 22    |
| H5C  | 4128 | -10669 | 2295 | 22    |
| H6A  | 3227 | -9711  | 123  | 22    |
| H6B  | 2845 | -10699 | 752  | 28    |
| H7   | 2708 | -7824  | 578  | 18    |
| H9A  | 1332 | -10799 | 1172 | 24    |
| H9B  | 2320 | -10551 | 2011 | 24    |
| H10A | 878  | -9269  | 2257 | 24    |
| H10B | 1309 | -10671 | 2850 | 24    |
| H11  | 2676 | -9384  | 3836 | 20    |
| H13A | 2660 | -6104  | 4921 | 20    |
| H13B | 3032 | -7553  | 5469 | 20    |
| H14  | 3793 | -7833  | 4355 | 16    |
| H15  | 3255 | -4300  | 4243 | 22    |
| H16A | 3891 | -2628  | 3545 | 42    |
| H16B | 4546 | -3896  | 3990 | 42    |
| H16C | 3968 | -3723  | 2726 | 42    |
| H17A | 2250 | -3009  | 2768 | 44    |
| H17B | 2303 | -4109  | 1938 | 44    |
| H17C | 1868 | -4518  | 2721 | 44    |
| H18A | 4718 | -6625  | 1872 | 29    |
| H18B | 5197 | -7884  | 1608 | 29    |

|      |           |            |           |    |
|------|-----------|------------|-----------|----|
| H18C | 4202      | -7546      | 830       | 29 |
| H19A | 1201      | -8252      | -645      | 33 |
| H19B | 1374      | -9867      | -499      | 33 |
| H19C | 582       | -9203      | -325      | 33 |
| H20A | 1210      | -6061      | 3406      | 43 |
| H20B | 702       | -7474      | 2974      | 43 |
| H20C | 989       | -7025      | 4195      | 43 |
| H4A  | 4950.0(4) | -9610.0(4) | 5470.0(3) | 58 |
| H4B  | 5000      | -11065(3)  | 5000      | 58 |
| H5A  | 441       | -6277      | 407       | 46 |

## Experimental

Single crystals of  $C_{20}H_{36}O_4$  [exp\_1423] were recrystallised from [solvents] mounted in inert oil and transferred to the cold gas stream of the diffractometer.

### Crystal structure determination of [exp\_1423]

**Crystal Data.**  $C_{20}H_{36}O_4$ ,  $M=340.49$ , monoclinic,  $a = 16.6326(11) \text{ \AA}$ ,  $b = 9.5624(4) \text{ \AA}$ ,  $c = 13.5122(10) \text{ \AA}$ ,  $\beta = 115.405(7)^\circ$ ,  $U = 1941.3(2) \text{ \AA}^3$ ,  $T = 98.0$ , space group C2 (no. 5),  $Z = 4$ ,  $\mu(\text{Cu K}\alpha) = 0.626$ , 8710 reflections measured, 3737 unique ( $R_{\text{int}} = 0.0169$ ) which were used in all calculations. The final  $wR(F_2)$  was 0.0901 (all data).

This report has been created with Olex2, compiled on 2011.02.15 svn.r1672. Please let us know if there are any errors or if you would like to have additional features.
