# Supplementary material for: Sarcophyolides B–E, New Cembranoids from the Soft Coral Sarcophyton elegans
Source: MDPI journal article supplement (doi:10.3390/md11093186), 2013-08-26
Supplement: s2 [file s2]

marinedrugs-11-03186-s001.mol
  corina  12171321413D 1   1.00000     0.00000 
CORINA 3.49 0023  12.04.2013
 24 26  0  0  0  0  0  0  0  0999 V2000
   -0.1024    1.6470    0.1114 C   0  0  0  0  0  0  0  0  0  0  0  0
   -0.0459    0.1178    0.0141 C   0  0  0  0  0  0  0  0  0  0  0  0
    1.9569    0.3661    1.9876 C   0  0  0  0  0  0  0  0  0  0  0  0
    3.3787    0.5263    2.5703 C   0  0  0  0  0  0  0  0  0  0  0  0
    1.6553   -1.1443    2.3246 C   0  0  0  0  0  0  0  0  0  0  0  0
    1.8565    2.6150    1.1842 C   0  0  0  0  0  0  0  0  0  0  0  0
    1.3191    2.1744    0.1008 C   0  0  0  0  0  0  0  0  0  0  0  0
    0.1445   -1.2295    2.1564 C   0  0  0  0  0  0  0  0  0  0  0  0
   -0.5378   -0.6687    1.1837 C   0  0  0  0  0  0  0  0  0  0  0  0
    2.1074   -1.0052    3.8172 C   0  0  0  0  0  0  0  0  0  0  0  0
    1.0623    0.0656    4.2758 C   0  0  0  0  0  0  0  0  0  0  0  0
    1.0023    1.0065    3.0435 C   0  0  0  0  0  0  0  0  0  0  0  0
   -2.0524   -0.8690    1.2798 C   0  0  0  0  0  0  0  0  0  0  0  0
   -2.3740   -2.3636    1.2197 C   0  0  0  0  0  0  0  0  0  0  0  0
   -2.5603   -0.2908    2.6022 C   0  0  0  0  0  0  0  0  0  0  0  0
    2.1415   -2.2900    4.6431 C   0  0  0  0  0  0  0  0  0  0  0  0
    2.0691    2.2038   -1.2133 C   0  0  0  0  0  0  0  0  0  0  0  0
    3.6724    2.0143    2.7734 C   0  0  0  0  0  0  0  0  0  0  0  0
    3.2596    2.8962    1.5750 C   0  0  0  0  0  0  0  0  0  0  0  0
    1.8982    0.5357    0.9285 H   0  0  0  0  0  0  0  0  0  0  0  0
   -0.8554   -0.2592   -1.1162 O   0  0  0  0  0  0  0  0  0  0  0  0
    2.1901   -1.8613    1.7409 H   0  0  0  0  0  0  0  0  0  0  0  0
    3.3557   -0.2537    3.7770 O   0  0  0  0  0  0  0  0  0  0  0  0
    4.4212   -0.0615    1.6050 C   0  0  0  0  0  0  0  0  0  0  0  0
  1  2  1  0      
  3  4  1  0      
  3  5  1  0      
  6  7  2  0      
  5  8  1  0      
  8  9  2  0      
  7  1  1  0      
  9  2  1  0      
  5 10  1  0      
 10 11  1  0      
 11 12  1  0      
  9 13  1  0      
 13 14  1  0      
 13 15  1  0      
 10 16  1  0      
  7 17  1  0      
  4 18  1  0      
 18 19  1  0      
 19  6  1  0      
  3 20  1  0      
  2 21  1  0      
  5 22  1  0      
  4 23  1  0      
 10 23  1  0      
 12  3  1  0      
  4 24  1  0      
M  END
$$$$
