# Supplementary material for: Sarcophyolides B–E, New Cembranoids from the Soft Coral Sarcophyton elegans
Source: MDPI journal article supplement (doi:10.3390/md11093186), 2013-08-26
Supplement: s3 [file s3]

marinedrugs-11-03186-s001.mol
  ChemDraw11291308452D

 24 26  0  0  0  0  0  0  0  0999 V2000
   -0.7557   -1.1739    0.0000 C   0  0  0  0  0  0  0  0  0  0  0  0
    0.0693   -1.1739    0.0000 C   0  0  0  0  0  0  0  0  0  0  0  0
   -0.3432    0.9975    0.0000 C   0  0  0  0  0  0  0  0  0  0  0  0
   -1.0783    0.7294    0.0000 C   0  0  0  0  0  0  0  0  0  0  0  0
    0.3506    0.7294    0.0000 C   0  0  0  0  0  0  0  0  0  0  0  0
   -1.4570    0.1107    0.0000 C   0  0  0  0  0  0  0  0  0  0  0  0
   -1.3538   -0.6937    0.0000 C   0  0  0  0  0  0  0  0  0  0  0  0
    0.7631    0.0150    0.0000 C   0  0  0  0  0  0  0  0  0  0  0  0
    0.6468   -0.6937    0.0000 C   0  0  0  0  0  0  0  0  0  0  0  0
    0.8200    1.3065    0.0000 C   0  0  0  0  0  0  0  0  0  0  0  0
    0.4163    1.9312    0.0000 C   0  0  0  0  0  0  0  0  0  0  0  0
   -0.3432    1.7400    0.0000 C   0  0  0  0  0  0  0  0  0  0  0  0
    1.3613   -1.1062    0.0000 C   0  0  0  0  0  0  0  0  0  0  0  0
    2.0757   -0.6937    0.0000 C   0  0  0  0  0  0  0  0  0  0  0  0
    1.3613   -1.9312    0.0000 C   0  0  0  0  0  0  0  0  0  0  0  0
    1.6450    1.3065    0.0000 C   0  0  0  0  0  0  0  0  0  0  0  0
   -2.0683   -1.1062    0.0000 C   0  0  0  0  0  0  0  0  0  0  0  0
   -1.6971    1.1081    0.0000 C   0  0  0  0  0  0  0  0  0  0  0  0
   -2.0757    0.4893    0.0000 C   0  0  0  0  0  0  0  0  0  0  0  0
   -0.5567    0.2007    0.0000 H   0  0  0  0  0  0  0  0  0  0  0  0
    0.4818   -1.8884    0.0000 O   0  0  0  0  0  0  0  0  0  0  0  0
    1.1475    0.5159    0.0000 H   0  0  0  0  0  0  0  0  0  0  0  0
   -1.0783    1.5544    0.0000 O   0  0  0  0  0  0  0  0  0  0  0  0
   -1.0783   -0.0956    0.0000 C   0  0  0  0  0  0  0  0  0  0  0  0
  1  2  1  0      
  3  4  1  0      
  3  5  1  0      
  6  7  2  0      
  5  8  1  0      
  8  9  2  0      
  7  1  1  0      
  9  2  1  0      
  5 10  1  0      
 10 11  1  0      
 11 12  1  0      
  9 13  1  0      
 13 14  1  0      
 13 15  1  0      
 10 16  1  0      
  7 17  1  0      
  4 18  1  0      
 18 19  1  0      
 19  6  1  0      
  3 20  1  1      
  2 21  1  1      
  5 22  1  6      
  4 23  1  6      
 10 23  1  6      
 12  3  1  0      
  4 24  1  0      
M  END
