# Supplementary material for: Sarcophyolides B–E, New Cembranoids from the Soft Coral Sarcophyton elegans
Source: MDPI journal article supplement (doi:10.3390/md11093186), 2013-08-26
Supplement: s4 [file s4]

marinedrugs-11-03186-s002.mol
  corina  12171321433D 1   1.00000     0.00000 
CORINA 3.49 0023  12.04.2013
 25 26  0  0  0  0  0  0  0  0999 V2000
   -0.0679    1.7033    0.1614 C   0  0  0  0  0  0  0  0  0  0  0  0
   -0.0474    0.1800    0.0124 C   0  0  0  0  0  0  0  0  0  0  0  0
    3.1138   -0.6133    2.4762 C   0  0  0  0  0  0  0  0  0  0  0  0
    4.3580    0.0511    1.9158 C   0  0  0  0  0  0  0  0  0  0  0  0
    2.1421   -1.1643    1.4332 C   0  0  0  0  0  0  0  0  0  0  0  0
    2.1415    1.8989    1.1529 C   0  0  0  0  0  0  0  0  0  0  0  0
    1.3499    2.2264    0.1637 C   0  0  0  0  0  0  0  0  0  0  0  0
    0.7402   -1.0559    1.9936 C   0  0  0  0  0  0  0  0  0  0  0  0
   -0.2352   -0.4676    1.3575 C   0  0  0  0  0  0  0  0  0  0  0  0
    2.4825   -2.6548    1.2735 C   0  0  0  0  0  0  0  0  0  0  0  0
    3.2941   -3.0650    2.5067 C   0  0  0  0  0  0  0  0  0  0  0  0
    3.4600   -1.8103    3.3732 C   0  0  0  0  0  0  0  0  0  0  0  0
   -1.6087   -0.4501    1.9944 C   0  0  0  0  0  0  0  0  0  0  0  0
   -2.0893   -1.8866    2.2097 C   0  0  0  0  0  0  0  0  0  0  0  0
   -1.5369    0.2711    3.3418 C   0  0  0  0  0  0  0  0  0  0  0  0
    1.8172    3.1180   -0.9561 C   0  0  0  0  0  0  0  0  0  0  0  0
    4.3407    1.5481    2.2505 C   0  0  0  0  0  0  0  0  0  0  0  0
    3.5687    2.3663    1.2222 C   0  0  0  0  0  0  0  0  0  0  0  0
    2.5712    0.1161    3.0996 H   0  0  0  0  0  0  0  0  0  0  0  0
   -1.1189   -0.2171   -0.8514 O   0  0  0  0  0  0  0  0  0  0  0  0
    2.1882   -0.6579    0.4897 H   0  0  0  0  0  0  0  0  0  0  0  0
    5.5282   -0.5001    2.5579 O   0  0  0  0  0  0  0  0  0  0  0  0
    4.5426   -0.1544    0.4172 C   0  0  0  0  0  0  0  0  0  0  0  0
    3.2561   -2.8603    0.0920 O   0  0  0  0  0  0  0  0  0  0  0  0
    1.2009   -3.4847    1.1986 C   0  0  0  0  0  0  0  0  0  0  0  0
  1  2  1  0      
  3  4  1  0      
  3  5  1  0      
  6  7  2  0      
  5  8  1  0      
  8  9  2  0      
  7  1  1  0      
  9  2  1  0      
  5 10  1  0      
 10 11  1  0      
 11 12  1  0      
  9 13  1  0      
 13 14  1  0      
 13 15  1  0      
  7 16  1  0      
  4 17  1  0      
 17 18  1  0      
 18  6  1  0      
  3 19  1  0      
  2 20  1  0      
  5 21  1  0      
  4 22  1  0      
 12  3  1  0      
  4 23  1  0      
 10 24  1  0      
 10 25  1  0      
M  END
$$$$
