# Supplementary material for: Sarcophyolides B–E, New Cembranoids from the Soft Coral Sarcophyton elegans
Source: MDPI journal article supplement (doi:10.3390/md11093186), 2013-08-26
Supplement: s6 [file s6]

marinedrugs-11-03186-s003.mol
  corina  12171321433D 1   1.00000     0.00000 
CORINA 3.49 0023  12.04.2013
 25 27  0  0  0  0  0  0  0  0999 V2000
    0.0332    0.4743    0.0308 C   0  0  0  0  0  0  0  0  0  0  0  0
   -0.3506   -0.9758    0.3270 C   0  0  0  0  0  0  0  0  0  0  0  0
   -0.8607   -1.4256    3.8474 C   0  0  0  0  0  0  0  0  0  0  0  0
    0.5546   -0.9337    3.6705 C   0  0  0  0  0  0  0  0  0  0  0  0
   -1.2173   -2.3751    2.6955 C   0  0  0  0  0  0  0  0  0  0  0  0
    2.4625    0.7153    1.1656 C   0  0  0  0  0  0  0  0  0  0  0  0
    1.5456    0.6309   -0.0251 C   0  0  0  0  0  0  0  0  0  0  0  0
   -2.1984   -1.6925    1.7915 C   0  0  0  0  0  0  0  0  0  0  0  0
   -1.8034   -1.0624    0.7085 C   0  0  0  0  0  0  0  0  0  0  0  0
   -1.7392   -3.6752    3.3026 C   0  0  0  0  0  0  0  0  0  0  0  0
   -1.6021   -3.5655    4.8268 C   0  0  0  0  0  0  0  0  0  0  0  0
   -1.0604   -2.1711    5.1620 C   0  0  0  0  0  0  0  0  0  0  0  0
   -2.8486   -0.4212   -0.1744 C   0  0  0  0  0  0  0  0  0  0  0  0
   -3.0683   -1.2874   -1.4163 C   0  0  0  0  0  0  0  0  0  0  0  0
   -4.1626   -0.2962    0.5992 C   0  0  0  0  0  0  0  0  0  0  0  0
    2.1674    0.1150   -1.3474 C   0  0  0  0  0  0  0  0  0  0  0  0
    0.7452    0.4334    3.0624 C   0  0  0  0  0  0  0  0  0  0  0  0
    2.1581    0.7294    2.6421 C   0  0  0  0  0  0  0  0  0  0  0  0
   -1.5390   -0.5649    3.8131 H   0  0  0  0  0  0  0  0  0  0  0  0
   -0.1380   -1.7751   -0.8422 O   0  0  0  0  0  0  0  0  0  0  0  0
   -0.3018   -2.6098    2.1384 H   0  0  0  0  0  0  0  0  0  0  0  0
   -0.9288   -4.7691    2.8451 O   0  0  0  0  0  0  0  0  0  0  0  0
   -3.1950   -3.9462    2.9340 C   0  0  0  0  0  0  0  0  0  0  0  0
    1.5622   -1.6817    4.0274 C   0  0  0  0  0  0  0  0  0  0  0  0
    2.0807    1.8872    0.4238 O   0  0  0  0  0  0  0  0  0  0  0  0
  1  2  1  0      
  3  4  1  0      
  3  5  1  0      
  6  7  1  0      
  5  8  1  0      
  8  9  2  0      
  7  1  1  0      
  9  2  1  0      
  5 10  1  0      
 10 11  1  0      
 11 12  1  0      
  9 13  1  0      
 13 14  1  0      
 13 15  1  0      
  7 16  1  0      
  4 17  1  0      
 17 18  1  0      
 18  6  1  0      
  3 19  1  0      
  2 20  1  0      
  5 21  1  0      
 12  3  1  0      
 10 22  1  0      
 10 23  1  0      
  4 24  2  0      
  6 25  1  0      
  7 25  1  0      
M  END
$$$$
