# Supplementary material for: Sarcophyolides B–E, New Cembranoids from the Soft Coral Sarcophyton elegans
Source: MDPI journal article supplement (doi:10.3390/md11093186), 2013-08-26
Supplement: s7 [file s7]

marinedrugs-11-03186-s003.mol
  ChemDraw11291308442D

 25 27  0  0  0  0  0  0  0  0999 V2000
   -0.7079   -1.1739    0.0000 C   0  0  0  0  0  0  0  0  0  0  0  0
    0.1171   -1.1739    0.0000 C   0  0  0  0  0  0  0  0  0  0  0  0
   -0.2954    0.9975    0.0000 C   0  0  0  0  0  0  0  0  0  0  0  0
   -1.0305    0.7294    0.0000 C   0  0  0  0  0  0  0  0  0  0  0  0
    0.3985    0.7294    0.0000 C   0  0  0  0  0  0  0  0  0  0  0  0
   -1.4091    0.1107    0.0000 C   0  0  0  0  0  0  0  0  0  0  0  0
   -1.3060   -0.6937    0.0000 C   0  0  0  0  0  0  0  0  0  0  0  0
    0.8110    0.0150    0.0000 C   0  0  0  0  0  0  0  0  0  0  0  0
    0.6946   -0.6937    0.0000 C   0  0  0  0  0  0  0  0  0  0  0  0
    0.8679    1.3065    0.0000 C   0  0  0  0  0  0  0  0  0  0  0  0
    0.4642    1.9312    0.0000 C   0  0  0  0  0  0  0  0  0  0  0  0
   -0.2954    1.7400    0.0000 C   0  0  0  0  0  0  0  0  0  0  0  0
    1.4091   -1.1062    0.0000 C   0  0  0  0  0  0  0  0  0  0  0  0
    2.1236   -0.6937    0.0000 C   0  0  0  0  0  0  0  0  0  0  0  0
    1.4091   -1.9312    0.0000 C   0  0  0  0  0  0  0  0  0  0  0  0
   -2.0205   -1.1062    0.0000 C   0  0  0  0  0  0  0  0  0  0  0  0
   -1.6492    1.1081    0.0000 C   0  0  0  0  0  0  0  0  0  0  0  0
   -2.0279    0.4893    0.0000 C   0  0  0  0  0  0  0  0  0  0  0  0
   -0.5089    0.2007    0.0000 H   0  0  0  0  0  0  0  0  0  0  0  0
    0.5296   -1.8884    0.0000 O   0  0  0  0  0  0  0  0  0  0  0  0
    1.1954    0.5159    0.0000 H   0  0  0  0  0  0  0  0  0  0  0  0
    1.4513    1.8898    0.0000 O   0  0  0  0  0  0  0  0  0  0  0  0
    1.6929    1.3065    0.0000 C   0  0  0  0  0  0  0  0  0  0  0  0
   -1.0305    1.5544    0.0000 C   0  0  0  0  0  0  0  0  0  0  0  0
   -2.1236   -0.3018    0.0000 O   0  0  0  0  0  0  0  0  0  0  0  0
  1  2  1  0      
  3  4  1  0      
  3  5  1  0      
  6  7  1  0      
  5  8  1  0      
  8  9  2  0      
  7  1  1  0      
  9  2  1  0      
  5 10  1  0      
 10 11  1  0      
 11 12  1  0      
  9 13  1  0      
 13 14  1  0      
 13 15  1  0      
  7 16  1  0      
  4 17  1  0      
 17 18  1  0      
 18  6  1  0      
  3 19  1  1      
  2 20  1  1      
  5 21  1  6      
 12  3  1  0      
 10 22  1  6      
 10 23  1  1      
  4 24  2  0      
  6 25  1  6      
  7 25  1  1      
M  END
