# Supplementary material for: Sarcophyolides B–E, New Cembranoids from the Soft Coral Sarcophyton elegans
Source: MDPI journal article supplement (doi:10.3390/md11093186), 2013-08-26
Supplement: s8 [file s8]

marinedrugs-11-03186-s004.mol
  corina  12171321443D 1   1.00000     0.00000 
CORINA 3.49 0023  12.04.2013
 26 28  0  0  0  0  0  0  0  0999 V2000
    0.2653    2.2839   -0.2443 C   0  0  0  0  0  0  0  0  0  0  0  0
    0.5776    0.7907   -0.1281 C   0  0  0  0  0  0  0  0  0  0  0  0
   -0.7278    0.0036    0.0003 C   0  0  0  0  0  0  0  0  0  0  0  0
   -1.6411    0.3296   -1.1831 C   0  0  0  0  0  0  0  0  0  0  0  0
   -1.8633    1.8417   -1.2532 C   0  0  0  0  0  0  0  0  0  0  0  0
    1.5723    5.6183   -2.4094 C   0  0  0  0  0  0  0  0  0  0  0  0
    0.7166    5.2640   -1.2235 C   0  0  0  0  0  0  0  0  0  0  0  0
    1.3515    4.5273   -0.0622 C   0  0  0  0  0  0  0  0  0  0  0  0
    1.5655    3.0636   -0.4510 C   0  0  0  0  0  0  0  0  0  0  0  0
   -1.7583    4.1091   -3.7351 C   0  0  0  0  0  0  0  0  0  0  0  0
   -1.3440    5.5408   -3.5177 C   0  0  0  0  0  0  0  0  0  0  0  0
   -1.3247    6.2901   -2.2067 C   0  0  0  0  0  0  0  0  0  0  0  0
   -0.5500    5.5655   -1.1511 C   0  0  0  0  0  0  0  0  0  0  0  0
   -2.7189    2.1768   -2.4766 C   0  0  0  0  0  0  0  0  0  0  0  0
   -2.7683    3.6951   -2.6634 C   0  0  0  0  0  0  0  0  0  0  0  0
   -0.9417    6.3968   -4.4571 C   0  0  0  0  0  0  0  0  0  0  0  0
   -0.6017    7.6792   -3.8335 C   0  0  0  0  0  0  0  0  0  0  0  0
   -0.7654    7.5996   -2.4977 O   0  0  0  0  0  0  0  0  0  0  0  0
    1.3870    0.5620    1.0271 O   0  0  0  0  0  0  0  0  0  0  0  0
    1.3306    0.3287   -1.3773 C   0  0  0  0  0  0  0  0  0  0  0  0
   -0.6017    2.5041   -1.3589 O   0  0  0  0  0  0  0  0  0  0  0  0
   -2.1063    1.5295   -3.7203 C   0  0  0  0  0  0  0  0  0  0  0  0
   -4.0436    1.6772   -2.2829 O   0  0  0  0  0  0  0  0  0  0  0  0
   -0.8500    6.0932   -5.9303 C   0  0  0  0  0  0  0  0  0  0  0  0
   -2.3635    6.4227   -1.8634 H   0  0  0  0  0  0  0  0  0  0  0  0
   -0.2265    8.6680   -4.4324 O   0  0  0  0  0  0  0  0  0  0  0  0
  1  2  1  0      
  2  3  1  0      
  3  4  1  0      
  4  5  1  0      
  6  7  1  0      
  7  8  1  0      
  8  9  1  0      
  9  1  1  0      
 10 11  1  0      
 11 12  1  0      
 12 13  1  0      
 13  7  2  0      
  5 14  1  0      
 14 15  1  0      
 15 10  1  0      
 11 16  2  0      
 16 17  1  0      
 17 18  1  0      
 18 12  1  0      
  2 19  1  0      
  2 20  1  0      
  1 21  1  0      
  5 21  1  0      
 14 22  1  0      
 14 23  1  0      
 16 24  1  0      
 12 25  1  0      
 17 26  2  0      
M  END
$$$$
