# Supplementary material for: Sarcophyolides B–E, New Cembranoids from the Soft Coral Sarcophyton elegans
Source: MDPI journal article supplement (doi:10.3390/md11093186), 2013-08-26
Supplement: s9 [file s9]

marinedrugs-11-03186-s004.mol
  ChemDraw11291308442D

 26 28  0  0  0  0  0  0  0  0999 V2000
   -1.4649    1.0715    0.0000 C   0  0  0  0  0  0  0  0  0  0  0  0
   -2.2899    1.0723    0.0000 C   0  0  0  0  0  0  0  0  0  0  0  0
   -2.7030    0.3582    0.0000 C   0  0  0  0  0  0  0  0  0  0  0  0
   -2.2912   -0.3567    0.0000 C   0  0  0  0  0  0  0  0  0  0  0  0
   -1.4662   -0.3574    0.0000 C   0  0  0  0  0  0  0  0  0  0  0  0
   -0.2280    0.3567    0.0000 C   0  0  0  0  0  0  0  0  0  0  0  0
    0.1851    1.0715    0.0000 C   0  0  0  0  0  0  0  0  0  0  0  0
   -0.2280    1.7864    0.0000 C   0  0  0  0  0  0  0  0  0  0  0  0
   -1.0530    1.7864    0.0000 C   0  0  0  0  0  0  0  0  0  0  0  0
    0.1851   -0.3586    0.0000 C   0  0  0  0  0  0  0  0  0  0  0  0
    1.0108   -0.3586    0.0000 C   0  0  0  0  0  0  0  0  0  0  0  0
    1.4239    0.3567    0.0000 C   0  0  0  0  0  0  0  0  0  0  0  0
    1.0108    1.0715    0.0000 C   0  0  0  0  0  0  0  0  0  0  0  0
   -1.0530   -1.0723    0.0000 C   0  0  0  0  0  0  0  0  0  0  0  0
   -0.2280   -1.0723    0.0000 C   0  0  0  0  0  0  0  0  0  0  0  0
    1.6076   -0.9626    0.0000 C   0  0  0  0  0  0  0  0  0  0  0  0
    2.3180   -0.6367    0.0000 C   0  0  0  0  0  0  0  0  0  0  0  0
    2.2318    0.1848    0.0000 O   0  0  0  0  0  0  0  0  0  0  0  0
   -3.1149    1.0723    0.0000 O   0  0  0  0  0  0  0  0  0  0  0  0
   -2.5034    1.8692    0.0000 C   0  0  0  0  0  0  0  0  0  0  0  0
   -1.0524    0.3570    0.0000 O   0  0  0  0  0  0  0  0  0  0  0  0
   -1.6364   -1.6556    0.0000 C   0  0  0  0  0  0  0  0  0  0  0  0
   -0.8395   -1.8692    0.0000 O   0  0  0  0  0  0  0  0  0  0  0  0
    1.6076   -1.7876    0.0000 C   0  0  0  0  0  0  0  0  0  0  0  0
    1.8364    1.0711    0.0000 H   0  0  0  0  0  0  0  0  0  0  0  0
    3.1149   -0.8503    0.0000 O   0  0  0  0  0  0  0  0  0  0  0  0
  1  2  1  0      
  2  3  1  0      
  3  4  1  0      
  4  5  1  0      
  6  7  1  0      
  7  8  1  0      
  8  9  1  0      
  9  1  1  0      
 10 11  1  0      
 11 12  1  0      
 12 13  1  0      
 13  7  2  0      
  5 14  1  0      
 14 15  1  0      
 15 10  1  0      
 11 16  2  0      
 16 17  1  0      
 17 18  1  0      
 18 12  1  0      
  2 19  1  6      
  2 20  1  1      
  1 21  1  1      
  5 21  1  1      
 14 22  1  1      
 14 23  1  6      
 16 24  1  0      
 12 25  1  6      
 17 26  2  0      
M  END
